# Supplementary material for: New Hydrazinothiazole Derivatives of Usnic Acid as Potent Tdp1 Inhibitors
Source: PubMed Central journal article supplement (PMC6832265; doi:10.3390/molecules24203711), 2019-10-15
Supplement: molecules-24-03711-s001.pdf [file molecules-24-03711-s001.pdf]

## Supplementary Material

# New Hydrazinothiazole Derivatives of Usnic Acid as Potent Tdp1 Inhibitors

Aleksander S. Filimonov <sup>1,3</sup>, Arina A. Chepanova <sup>2</sup>, Olga A. Luzina <sup>1</sup>, Alexandra L. Zakharenko <sup>2</sup>, Olga D. Zakharova <sup>2</sup>, Ekaterina S. Ilina <sup>2</sup>, Nadezhda S. Dyrkheeva <sup>2</sup>, Maxim S. Kuprushkin <sup>2</sup>, Anton V. Kolotaev <sup>4</sup>, Derenik S. Khachatryan <sup>4</sup>, Jinal Patel <sup>5</sup>, Ivanhoe K.H. Leung <sup>5</sup>, Raina Chand <sup>5</sup>, Daniel M. Ayine-Tora <sup>5</sup>, Johannes Reynisson <sup>6</sup>, Konstantin P. Volcho <sup>1,3,\*</sup>, Nariman F. Salakhutdinov <sup>1,3</sup> and Olga I. Lavrik <sup>1,3</sup>

- <sup>1</sup> N. N. Vorozhtsov Novosibirsk Institute of Organic Chemistry, Siberian Branch of the Russian Academy of Sciences, 9, Akademika Lavrentieva Ave., Novosibirsk 630090, Russian Federation
  - <sup>2</sup> Novosibirsk Institute of Chemical Biology and Fundamental Medicine, Siberian Branch of the Russian Academy of Sciences, 8, Akademika Lavrentieva Ave., Novosibirsk 630090, Russian Federation
  - <sup>3</sup> Novosibirsk State University, Pirogova str. 1, Novosibirsk 630090, Russian Federation
  - <sup>4</sup> The Federal State Unitary Enterprise, Institute of Chemical Reagents and High Purity Chemical Substances of National Research Centre, Kurchatov Institute, Moscow 107076, Russia
  - <sup>5</sup> School of Chemical Sciences, The University of Auckland, New Zealand
  - <sup>6</sup> School of Pharmacy and Bioengineering, Keele University, Hornbeam Building, Staffordshire ST5 5BG, UK
- \* Correspondence: volcho@nioch.nsc.ru (V.K.P.), lavrik@niboch.nsc.ru (O.I.L.); Tel.: +7-383-3308870 (V.K.P.); +7-383-3635195 (O.I.L.)

## **Content**

1. Tables S1-S16
2. NMR spectra of the products
3. Changes in intrinsic fluorescence intensity of Tdp1 (10  $\mu\text{M}$ ) upon the addition of compounds
4. Tables S17-S21

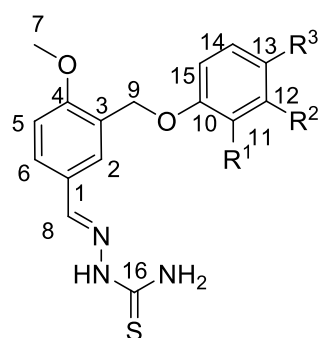

**12a** R<sup>1</sup>=H R<sup>2</sup>=H R<sup>3</sup>=F  
**12b** R<sup>1</sup>=H R<sup>2</sup>=F R<sup>3</sup>=H  
**12c** R<sup>1</sup>=F R<sup>2</sup>=H R<sup>3</sup>=H  
**12d** R<sup>1</sup>=H R<sup>2</sup>=Cl R<sup>3</sup>=F  
**12e** R<sup>1</sup>=F R<sup>2</sup>=H R<sup>3</sup>=F  
**12f** R<sup>1</sup>=Cl R<sup>2</sup>=H R<sup>3</sup>=F

**Table S1:** Spectra NMR<sup>1</sup>H of **12a-12f** (DMSO-d<sub>6</sub>, δ):

| Nº              | 12a         | 12b         | 12c                  | 12d                  | 12e                  | 12f                  |
|-----------------|-------------|-------------|----------------------|----------------------|----------------------|----------------------|
| H-2             | s 8.00      | s 8.01      | s 8.01               | s 8.00               | s 8.01               | s 8.01               |
| H-5             | m 7.00-7.15 | m 7.08-7.30 | d 7.09<br>(J=8.7 Hz) | d 7.07<br>(J=8.6 Hz) | d 7.01<br>(J=8.6 Hz) | d 7.01<br>(J=8.6 Hz) |
| H-6             | m 7.72      | m 7.75      | m 7.77               | m 7.72               | m 7.75               | m 7.77               |
| H-7             | s 3.86      | s 3.86      | s 3.85               | s 3.85               | s 3.86               | s 3.86               |
| H-8             | s 8.12      | s 8.13      | s 8.16               | s 8.14               | s 8.13               | s 8.15               |
| H-9             | s 5.00      | s 5.09      | s 5.09               | s 5.02               | s 5.04               | s 5.09               |
| H-11            | m 7.00-7.15 | m 7.08-7.30 |                      | t 7.35<br>(J=9.1 Hz) |                      |                      |
| H-12            | m 7.00-7.15 |             | m 7.21               |                      | m 6.77               | m 7.42               |
| H-13            |             | m 7.08-7.30 | m 7.28               |                      |                      |                      |
| H-14            | m 7.00-7.15 | m 7.08-7.30 | t 7.11<br>(J=7.7 Hz) | m 7.27               | m 6.77               | m 7.28               |
| H-15            | m 7.00-7.15 | m 6.95      | m 6.95               | m 7.02               | m 6.77               | m 7.17               |
| NH              | s 11.32     | s 11.33     | s 11.35              | s 11.34              | s 11.33              | s 11.33              |
| NH <sub>2</sub> | m 7.90      | m 7.89      | m 7.90               | m 7.92               | m 7.93               | m 7.87               |

**Table S2:** Spectra NMR  $^{13}\text{C}$  of **12a-12f** (DMSO- $d_6$ ,  $\delta$ ):

| <b>№</b> | <b>12a</b>                | <b>12b</b>               | <b>12c</b>               | <b>12d</b>             | <b>12e</b>             | <b>5f</b>              |
|----------|---------------------------|--------------------------|--------------------------|------------------------|------------------------|------------------------|
| C-1      | 125.39                    | 124.99                   | 124.57                   | 124.94                 | 124.53                 | 124.93                 |
| C-2      | 129.11                    | 129.54                   | 129.12                   | 129.27                 | 129.57                 | 129.20                 |
| C-3      | 126.95                    | 126.97                   | 126.56                   | 126.99                 | 127.01                 | 126.98                 |
| C-4      | 159.03                    | 159.18                   | 158.78                   | 159.07                 | 159.17                 | 159.10                 |
| C-5      | 111.60                    | 111.74                   | 111.32                   | 111.65                 | 111.68                 | 111.78                 |
| C-6      | 129.85                    | 129.99                   | 129.57                   | 130.08                 | 130.30                 | 129.83                 |
| C-7      | 56.23                     | 56.27                    | 55.86                    | 56.25                  | 56.26                  | 56.29                  |
| C-8      | 142.52                    | 142.41                   | 141.99                   | 142.42                 | 142.33                 | 142.44                 |
| C-9      | 65.62                     | 66.17                    | 65.75                    | 66.03                  | 66.12                  | 66.78                  |
| C-10     | 155.33                    | d 146.83<br>(J=10 Hz)    | d 146.42<br>(J=11 Hz)    | d 155.62<br>(J=2.4 Hz) | t 161.17<br>(J=14 Hz)  | d 151.14<br>(J=2.4 Hz) |
| C-11     | d<br>116.37(J=4<br>Hz)    | 115.69                   | d 150.60<br>(J=248 Hz)   | d 115.53<br>(J=7 Hz)   | d 162.40<br>(J=244 Hz) | d 122.50<br>(J= 10Hz)  |
| C-12     | d<br>116.19(J=1<br>1 Hz)  | d151<br>(J=244 Hz)       | d<br>115.96(J=1<br>8 Hz) | d 120.08<br>(J=17 Hz)  | t 96.65<br>(J=27 Hz)   | d 117.51<br>(J=28 Hz)  |
| C-13     | d<br>155.83(J=2<br>40 Hz) | d<br>116.38(J=1<br>8 Hz) | d 121.21<br>(J=7 Hz)     | d 151.12<br>(J=247 Hz) | d 162.25<br>(J=244 Hz) | d 155.08<br>(J=247 Hz) |
| C-14     | d<br>116.19(J=1<br>1 Hz)  | d 125.30<br>(J=3 Hz)     | d 124.88<br>(J=3 Hz)     | d 117.56<br>(J=22 Hz)  | m 99.15                | d 115.01<br>(J=21 Hz)  |
| C-15     | d<br>116.37(J=4<br>Hz)    | d 121.63<br>(J=7 Hz)     | 115.27                   | 116.63                 | m 99.43                | d 115.54<br>(J=9.4 Hz) |
| C-16     | 178.04                    | 178.06                   | 177.64                   | 178.06                 | 178.07                 | 178.09                 |

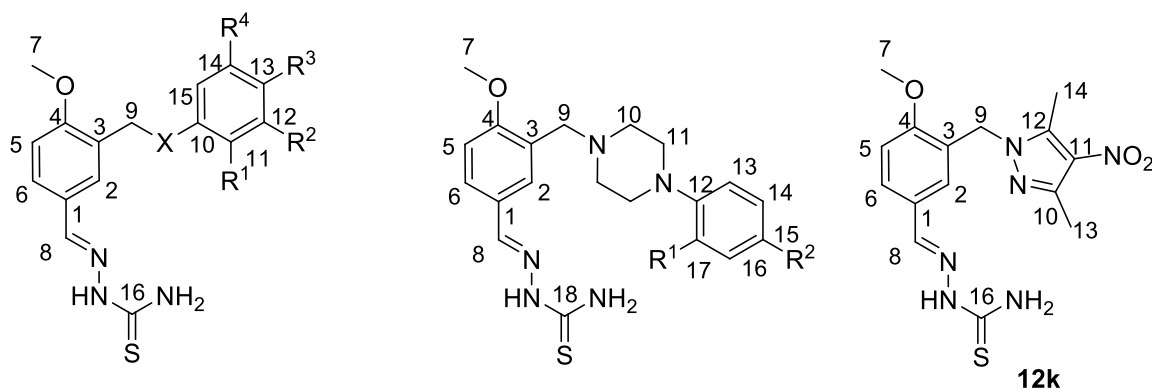

**Table S3:** Spectra NMR<sup>1</sup>H of **12f-12k** (DMSO-d<sub>6</sub>, δ):

| №               | <b>12g</b>           | <b>12h</b>           | <b>12i</b>           | <b>12j</b>             | <b>12k</b>           |
|-----------------|----------------------|----------------------|----------------------|------------------------|----------------------|
| H-2             | s 7.91               | s 7.99               | s 8.00               | s 8.00                 | s 7.89               |
| H-5             | d 7.00<br>(J=9.3 Hz) | m 7.04               | m 7.02               | d 7.05<br>(J=8.5 Hz)   | d 7.03<br>(J=8.5 Hz) |
| H-6             | m 7.62               | m 7.72               | m 7.69               | bs 7.75                | m 7.63               |
| H-7             | s 3.80               | s 3.85               | s 3.83               | s 3.83                 | s 3.81               |
| H-8             | s 8.14               | s 8.14               | s 8.11               | s 8.15                 | s 7.97               |
| H-9             | s 4.09               | s 5.00               | s 3.55               | s 3.68                 | s 5.21               |
| H-10            |                      |                      | bs 2.57              | bs 2.69                |                      |
| H-11            | s 1.19 (t-Bu)        |                      | bs 3.07              | bs 2.93                |                      |
| H-12            | s 7.09               | s 2.28 (Me)          |                      |                        |                      |
| H-13            | s 7.18               | m 7.06               | m 6.90               | m 6.87-6.94            | 2.34                 |
| H-14            | s 2.21 (Me)          | m 7.28               | m 7.02               | m 6.87-6.94            | 2.67                 |
| H-15            | s 7.09               | m 6.86               |                      | m 6.87-6.94            |                      |
| H-16            |                      |                      | m 7.02               | m 6.87-6.94            |                      |
| H-17            |                      |                      | m 6.90               | s 3.74<br>(OMe)        |                      |
| NH              | s 11.32              | s 11.33              | s 11.29              | s 11.34                | s 11.33              |
| NH <sub>2</sub> | s 7.62 and<br>s 7.80 | s 7.89 and<br>s 7.93 | m 7.69 and<br>s 7.85 | bs 7.72 and<br>bs 7.90 | s 7.75 and<br>s 7.78 |

**Table S4: Spectra NMR  $^{13}\text{C}$  of 12f-12k (DMSO- $d_6$ ,  $\delta$ ):**

| <b>№</b> | <b>12g</b>                   | <b>12h</b>                   | <b>12i</b>             | <b>12j</b> | <b>12k</b> |
|----------|------------------------------|------------------------------|------------------------|------------|------------|
| C-1      | 125.87                       | 124.88                       | 127.95                 | 126.36     | 123.74     |
| C-2      | 129.13                       | 129.36                       | 126.19                 | 128.64     | 129.05     |
| C-3      | 126.31                       | 126.52                       | 127.95                 | 126.36     | 126.59     |
| C-4      | 158.47                       | 158.57                       | 159.03                 | 159.28     | 158.26     |
| C-5      | 111.11                       | 111.19                       | 111.16                 | 111.38     | 111.30     |
| C-6      | 129.59                       | 129.50                       | 129.64                 | 130.46     | 129.37     |
| C-7      | 55.77                        | 55.80                        | 55.67                  | 55.89      | 55.83      |
| C-8      | 142.02                       | 142.12                       | 142.24                 | 142.42     | 141.87     |
| C-9      | 31.52                        | 64.84                        | 48.73                  | 49.30      | 48.10      |
| C-10     | 134.24                       | 157.29                       | 55.06                  | 55.05      | 145.04     |
|          | 148.8 (C, Ar)                |                              |                        |            |            |
| C-11     | 30.88 (Me t-Bu)              | 117.36                       | 52.36                  | 52.55      | 130.02     |
|          | 34.14 (C, t-Bu)              |                              |                        |            |            |
| C-12     | 128.25                       | 128.60 (C, Ar)<br>19.79 (Me) | 147.75                 | 152.02     | 141.38     |
| C-13     | 125.88                       | 136.52                       | 117.02<br>(J=7 Hz)     | 111.92     | 11.39      |
| C-14     | 134.58 (C, Ar)<br>19.32 (Me) | 124.70                       | 115.06<br>(J=22 Hz)    | 118.13     | 13.90      |
| C-15     | 123.05                       | 113.82                       | d 155.00<br>(J=232 Hz) | 122.77     |            |
| C-16     | 177.58                       | 177.66                       | 115.06<br>(J=22 Hz)    | 120.92     | 177.67     |
| C-17     |                              |                              | 117.02<br>(J=7 Hz)     | 140.08     |            |
| C-18     |                              |                              | 177.60                 | 177.64     |            |

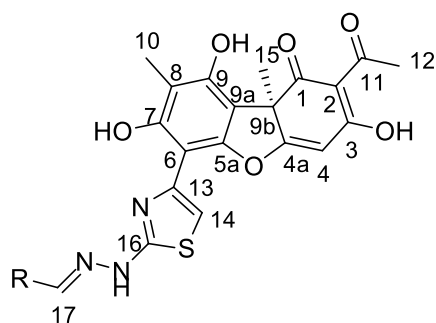

Spectra NMR  $^1\text{H}$  ( $\text{CDCl}_3$ ,  $\delta$ ): 1.67 (3H, s, H-15), 2.13 (3H, s, H-10), 2.61 (3H, s, H-12), 5.88 (1H, s, H-4). Spectra NMR  $^{13}\text{C}$  ( $\text{CDCl}_3$ ,  $\delta$ ): 8.3 (C-10), 27.6 (C-12), 32.0 (C-15), 59.3 (C-9b), 97.2 (C-4), 97.3 (C-9a), 103.3 (C-6), 104.4 (C-14), 105.0 (C-2), 108.8 (C-8), 143.4 (C-13), 151.3 (C-7), 151.4 (C-9), 156.3 (C-5a), 166.4 (C-16), 180.4 (C-4a), 191.5 (C-3), 197.9 (C-1), 201.2 (C-11).

Spectra NMR  $^1\text{H}$  ( $\text{DMSO-d}_6$ ,  $\delta$ ): 1.70 (3H, s, H-15), 2.03 (3H, s, H-10), 2.60 (3H, s, H-12), 6.20 (1H, s, H-4). Spectra NMR  $^{13}\text{C}$  ( $\text{DMSO-d}_6$ ,  $\delta$ ): 8.3 (C-10), 27.6 (C-12), 32.0 (C-15), 59.0 (C-9b), 96.9 (C-9a), 97.3 (C-4), 103.3 (C-6), 105.1 (C-2), 105.6 (C-14), 107.3 (C-8), 143.0 (C-13), 151.3 (C-7), 151.4 (C-9), 156.3 (C-5a), 166.4 (C-16), 180.4 (C-4a), 191.5 (C-3), 197.9 (C-1), 201.2 (C-11).

**Table S5:** Spectra NMR<sup>1</sup>H of **16a-16e** (DMSO-d<sub>6</sub>, δ):

| №                | <b>16a</b>                                                                        | <b>16b</b>                                                                        | <b>16c</b>                                                                         | <b>16d</b>                                                                          | <b>16e</b>                                                                          |
|------------------|-----------------------------------------------------------------------------------|-----------------------------------------------------------------------------------|------------------------------------------------------------------------------------|-------------------------------------------------------------------------------------|-------------------------------------------------------------------------------------|
| <b>Structure</b> | 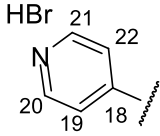 |  |  |  |  |
| <b>H-14</b>      | s 7.39                                                                            | s 7.39                                                                            | s 7.38                                                                             | s 7.27                                                                              | s 7.23                                                                              |
| <b>H-17</b>      | s 8.16                                                                            | s 8.15                                                                            | s 8.22                                                                             | s 8.08                                                                              | s 8.16                                                                              |
| <b>H-19</b>      | d 8.10<br>(J=5.5 Hz)                                                              | d 8.07<br>(J=8.0 Hz)                                                              | s 9.13                                                                             | d 7.34<br>(J=4.5 Hz)                                                                | d 7.19<br>(J=4.9 Hz)                                                                |
| <b>H-20</b>      | d 8.84<br>(J=5.5 Hz)                                                              | t 7.66<br>(J=5.9 Hz)                                                              | d 8.85<br>(J=5.1 Hz)                                                               | d 7.98<br>(J=4.5 Hz)                                                                | m 6.79                                                                              |
| <b>H-21</b>      | d 8.84<br>(J=5.5 Hz)                                                              | t 8.21<br>(J=5.1 Hz)                                                              | m 8.21                                                                             |                                                                                     |                                                                                     |
| <b>H-22</b>      | d 8.10<br>(J=5.5 Hz)                                                              | d 8.71<br>(J=5.1 Hz)                                                              | d 8.70<br>(J=5.1 Hz)                                                               |                                                                                     | s 2.46                                                                              |
| <b>NH</b>        | bs 12.37                                                                          | bs 12.45                                                                          | ---                                                                                | s 12.78                                                                             | ---                                                                                 |
| <b>OH-3</b>      | ---                                                                               | bs 18.82                                                                          | bs 18.76                                                                           | bs 18.78                                                                            | bs 18.82                                                                            |
| <b>OH-7</b>      | s 13.28                                                                           | s 13.05                                                                           | s 12.96                                                                            | s 12.49                                                                             | s 12.27                                                                             |
| <b>OH-9</b>      | ---                                                                               | bs 10.30                                                                          | bs 10.30                                                                           | s 10.23                                                                             | s 10.27                                                                             |

**Table S6:** Spectra NMR<sup>13</sup>C of **16a-16e** (DMSO-d<sub>6</sub>, δ):

| №                | <b>16a</b>                                                                          | <b>16b</b>                                                                          | <b>16c</b>                                                                           | <b>16d</b>                                                                            | <b>16e</b>                                                                            |
|------------------|-------------------------------------------------------------------------------------|-------------------------------------------------------------------------------------|--------------------------------------------------------------------------------------|---------------------------------------------------------------------------------------|---------------------------------------------------------------------------------------|
| <b>Structure</b> | 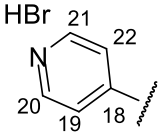 |  |  |  |  |
| <b>C-17</b>      | 137.15                                                                              | 146.33                                                                              | 137.05                                                                               | 135.56                                                                                | 138.62                                                                                |
| <b>C-18</b>      | 148.81                                                                              | 150.12                                                                              | 133.07                                                                               | 146.60                                                                                | 136.51                                                                                |
| <b>C-19</b>      | 122.41                                                                              | 124.82                                                                              | 141.66                                                                               | 130.58                                                                                | 130.36                                                                                |
| <b>C-20</b>      | 143.16                                                                              | 138.72                                                                              | 143.08                                                                               | 128.13                                                                                | 126.38                                                                                |
| <b>C-21</b>      | 143.16                                                                              | 121.21                                                                              | 126.76                                                                               | 149.84                                                                                | 142.34                                                                                |
| <b>C-22</b>      | 122.41                                                                              | 140.70                                                                              | 139.95                                                                               |                                                                                       | 15.35                                                                                 |



**Table S7:** Spectra NMR <sup>1</sup>H of **16f-16j** (CDCl<sub>3</sub>, δ):

| N <sup>o</sup>   | <b>16f</b>                                                                        | <b>16g</b>                                                                        | <b>16h</b>                                                                        | <b>16i</b>                                                                          | <b>16j</b>                                                                          |
|------------------|-----------------------------------------------------------------------------------|-----------------------------------------------------------------------------------|-----------------------------------------------------------------------------------|-------------------------------------------------------------------------------------|-------------------------------------------------------------------------------------|
| <b>Structure</b> | 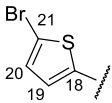 |  |  |  |  |
| <b>H-14</b>      | s 7.11                                                                            | s 7.08                                                                            | s 7.04                                                                            | s 7.09                                                                              | s 7.12                                                                              |
| <b>H-17</b>      | s 7.58                                                                            | s 7.81                                                                            | bs 8.12                                                                           | s 7.73                                                                              | s 7.78                                                                              |
| <b>H-19</b>      | d 6.77<br>(J=3.8 Hz)                                                              | d 7.08<br>(J=3.4 Hz)                                                              | s 7.04                                                                            |                                                                                     | s 7.43                                                                              |
| <b>H-20</b>      | d 6.86<br>(J=3.8 Hz)                                                              | m 6.94                                                                            |                                                                                   | d 6.72<br>(J=5.3 Hz)                                                                | d 7.46<br>(J=4.9 Hz)                                                                |
| <b>H-21</b>      |                                                                                   | d 7.27<br>(J=5.0 Hz)                                                              | s 7.19                                                                            | d 7.14<br>(J=4.9 Hz)                                                                | m 7.31                                                                              |
| <b>H-22</b>      |                                                                                   |                                                                                   |                                                                                   | s 2.23                                                                              |                                                                                     |
| <b>NH</b>        | bs 9.06                                                                           | bs 9.48                                                                           | ---                                                                               | bs 9.11                                                                             | bs 8.99                                                                             |
| <b>OH-3</b>      | s 18.79                                                                           | s 18.78                                                                           | s 18.79                                                                           | s 18.78                                                                             | s 18.79                                                                             |
| <b>OH-7</b>      | ---                                                                               | ---                                                                               | ---                                                                               | ---                                                                                 | ---                                                                                 |
| <b>OH-9</b>      | s 10.29                                                                           | s 10.27                                                                           | s 10.40                                                                           | s 10.26                                                                             | s 10.28                                                                             |

**Table S8:** Spectra NMR <sup>13</sup>C of **16f-16j** (CDCl<sub>3</sub>, δ):

| N <sup>o</sup>   | <b>16f</b>                                                                          | <b>16g</b>                                                                          | <b>16h</b>                                                                          | <b>16i</b>                                                                            | <b>16j</b>                                                                            |
|------------------|-------------------------------------------------------------------------------------|-------------------------------------------------------------------------------------|-------------------------------------------------------------------------------------|---------------------------------------------------------------------------------------|---------------------------------------------------------------------------------------|
| <b>Structure</b> | 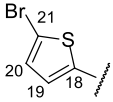 |  |  |  |  |
| <b>C-17</b>      | 135.97                                                                              | 142.67                                                                              | 138.68                                                                              | 136.47                                                                                | 137.90                                                                                |
| <b>C-18</b>      | 139.39                                                                              | 138.12                                                                              | 138.72                                                                              | 131.71                                                                                | 136.51                                                                                |
| <b>C-19</b>      | 128.64                                                                              | 137.70                                                                              | 131.84                                                                              | 138.95                                                                                | 124.77                                                                                |
| <b>C-20</b>      | 129.92                                                                              | 127.87                                                                              | 110.30                                                                              | 126.73                                                                                | 126.09                                                                                |
| <b>C-21</b>      | 115.29                                                                              | 129.21                                                                              | 125.35                                                                              | 130.60                                                                                | 126.59                                                                                |
| <b>C-22</b>      |                                                                                     |                                                                                     |                                                                                     | 13.95                                                                                 |                                                                                       |

**Table S9:** Spectra NMR<sup>1</sup>H of **16k-16o** (CDCl<sub>3</sub> for 16k,l,n and DMSO-d<sub>6</sub> for 16m,o; δ):

| N <sub>2</sub>       | 16k                                                                               | 16l                                                                               | 16m                                                                               | 16n                                                                                 | 16o                                                                                 |
|----------------------|-----------------------------------------------------------------------------------|-----------------------------------------------------------------------------------|-----------------------------------------------------------------------------------|-------------------------------------------------------------------------------------|-------------------------------------------------------------------------------------|
| <b>Structure</b>     | 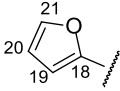 |  |  |  |  |
| <b>H-14</b>          | s 7.15                                                                            | s 7.11                                                                            | s 7.24                                                                            | s 7.09                                                                              | s 7.37                                                                              |
| <b>H-17</b>          | s 7.60                                                                            | s 7.63                                                                            | s 7.94                                                                            | s 7.68                                                                              | s 8.09                                                                              |
| <b>H-19</b>          | d 6.65<br>(J=2.5 Hz)                                                              | s 7.59                                                                            | s 6.46                                                                            | m 6.39                                                                              | s 8.00                                                                              |
| <b>H-20</b>          | m 6.45                                                                            | s 7.39                                                                            | s 6.14                                                                            | m 6.11                                                                              | s 9.17                                                                              |
| <b>H-21</b>          | d 7.49<br>(J=2.2 Hz)                                                              | m 6.75                                                                            | s 6.92                                                                            | s 6.72                                                                              |                                                                                     |
| <b>H-22</b>          |                                                                                   |                                                                                   |                                                                                   | s 3.91                                                                              |                                                                                     |
| <b>NH</b>            | s 8.88                                                                            | bs 8.93                                                                           | ---                                                                               | bs 8.68                                                                             | ---                                                                                 |
| <b>NH</b><br>(HetAr) |                                                                                   |                                                                                   | s 11.30                                                                           |                                                                                     | s 12.60                                                                             |
| <b>OH-3</b>          | s 18.77                                                                           | s 18.79                                                                           | bs 18.77                                                                          | s 18.79                                                                             | ---                                                                                 |
| <b>OH-7</b>          | bs 12.40                                                                          | ---                                                                               | s 12.05                                                                           | ---                                                                                 | s 12.71                                                                             |
| <b>OH-9</b>          | s 10.26                                                                           | s 10.95                                                                           | s 10.28                                                                           | s 10.28                                                                             | s 10.31                                                                             |

**Table S10:** Spectra NMR<sup>13</sup>C of **16k-16o** (CDCl<sub>3</sub> for 16k,l,n and DMSO-d<sub>6</sub> for 16m,o; δ):

| N <sub>2</sub>   | 16k                                                                                 | 16l                                                                                 | 16m                                                                                  | 16n                                                                                   | 16o                                                                                   |
|------------------|-------------------------------------------------------------------------------------|-------------------------------------------------------------------------------------|--------------------------------------------------------------------------------------|---------------------------------------------------------------------------------------|---------------------------------------------------------------------------------------|
| <b>Structure</b> | 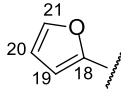 |  |  |  |  |
| <b>C-17</b>      | 132.37                                                                              | 135.09                                                                              | 136.59                                                                               | 136.37                                                                                | 130.90                                                                                |
| <b>C-18</b>      | 148.62                                                                              | 121.97                                                                              | 126.80                                                                               | 126.39                                                                                | 128.58                                                                                |
| <b>C-19</b>      | 112.28                                                                              | 143.42                                                                              | 109.33                                                                               | 115.74                                                                                | 119.55                                                                                |
| <b>C-20</b>      | 111.72                                                                              | 144.00                                                                              | 112.13                                                                               | 108.03                                                                                | 132.36                                                                                |
| <b>C-21</b>      | 144.26                                                                              | 107.19                                                                              | 122.14                                                                               | 128.01                                                                                |                                                                                       |
| <b>C-22</b>      |                                                                                     |                                                                                     |                                                                                      | 37.09                                                                                 |                                                                                       |

**Table S11:** Spectra NMR <sup>1</sup>H of **16p-16r** (CDCl<sub>3</sub> for 16o and DMSO-d<sub>6</sub> for 16p,q; δ):

| N <sup>o</sup>    | <b>16p</b>                                                                        | <b>16q</b>                                                                         | <b>16r</b>                                                                          |
|-------------------|-----------------------------------------------------------------------------------|------------------------------------------------------------------------------------|-------------------------------------------------------------------------------------|
| <b>Structure</b>  | 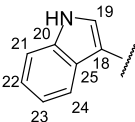 |  |  |
| <b>H-14</b>       | s 7.24                                                                            | s 7.22                                                                             | s 7.12                                                                              |
| <b>H-17</b>       | s 8.30                                                                            | s 8.33                                                                             | s 7.68                                                                              |
| <b>H-19</b>       | m 8.21                                                                            |                                                                                    | d 6.69 (J=3.3 Hz, AB-system)                                                        |
| <b>H-20</b>       |                                                                                   |                                                                                    | d 6.66 (J=3.3 Hz, AB-system)                                                        |
| <b>H-21</b>       | s 7.45                                                                            | m 7.34                                                                             |                                                                                     |
| <b>H-22</b>       | m 7.21                                                                            | m 7.13                                                                             |                                                                                     |
| <b>H-23</b>       | m 7.21                                                                            | m 7.13                                                                             | s 7.62                                                                              |
| <b>H-24</b>       | d 7.83 (J=2.7 Hz)                                                                 | m 8.10                                                                             |                                                                                     |
| <b>H-25</b>       |                                                                                   |                                                                                    | d 7.52 (J=7.5 Hz)                                                                   |
| <b>H-26</b>       |                                                                                   | s 2.51                                                                             | m 7.21-7.30                                                                         |
| <b>H-27</b>       |                                                                                   |                                                                                    | m 7.21-7.30                                                                         |
| <b>NH</b>         | s 12.08                                                                           | s 12.00                                                                            | ---                                                                                 |
| <b>NH (HetAr)</b> | s 11.59                                                                           | s 11.51                                                                            |                                                                                     |
| <b>OH-3</b>       | bs 18.82                                                                          | bs 18.82                                                                           | s 18.76                                                                             |
| <b>OH-7</b>       | s 13.03                                                                           | bs 13.05                                                                           | ---                                                                                 |
| <b>OH-9</b>       | s 10.30                                                                           | s 10.31                                                                            | s 10.26                                                                             |

**Table S12:** Spectra NMR <sup>13</sup>C of **16p-16r** (CDCl<sub>3</sub> for 16o and DMSO-d<sub>6</sub> for 16p,q; δ):

| N <sup>o</sup>   | <b>16n</b>                                                                          | <b>16o</b>                                                                          | <b>16r</b>                                                                            |
|------------------|-------------------------------------------------------------------------------------|-------------------------------------------------------------------------------------|---------------------------------------------------------------------------------------|
| <b>Structure</b> | 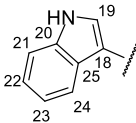 |  |  |
| <b>C-17</b>      | 140.39                                                                              | 140.29                                                                              | 132.95                                                                                |
| <b>C-18</b>      | 111.35                                                                              | 107.42                                                                              | 148.80                                                                                |
| <b>C-19</b>      | 130.13                                                                              | 135.76                                                                              | 108.17                                                                                |
| <b>C-20</b>      | 137.11                                                                              | 139.52                                                                              | 114.29                                                                                |
| <b>C-21</b>      | 111.95                                                                              | 110.99                                                                              | 153.82                                                                                |
| <b>C-22</b>      | 121.59                                                                              | 120.63                                                                              | 131.35                                                                                |
| <b>C-23</b>      | 120.59                                                                              | 120.46                                                                              | 123.92                                                                                |
| <b>C-24</b>      | 122.64                                                                              | 121.83                                                                              | 134.78                                                                                |
| <b>C-25</b>      | 124.02                                                                              | 124.02                                                                              | 127.90                                                                                |
| <b>C-26</b>      |                                                                                     | 11.53                                                                               | 129.91                                                                                |
| <b>C-27</b>      |                                                                                     |                                                                                     | 122.03                                                                                |

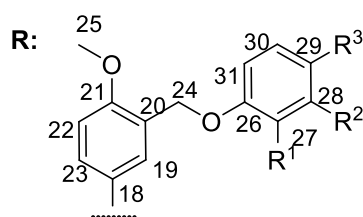

**17a** R<sup>1</sup>=H R<sup>2</sup>=H R<sup>3</sup>=F

**17b** R<sup>1</sup>=H R<sup>2</sup>=F R<sup>3</sup>=H

**17c** R<sup>1</sup>=F R<sup>2</sup>=H R<sup>3</sup>=H

**17d** R<sup>1</sup>=H R<sup>2</sup>=Cl R<sup>3</sup>=F

**17e** R<sup>1</sup>=F R<sup>2</sup>=H R<sup>3</sup>=F

**17f** R<sup>1</sup>=Cl R<sup>2</sup>=H R<sup>3</sup>=F

**Table S13:** Spectra NMR<sup>1</sup>H of **17a-17f** (CDCl<sub>3</sub>, δ):

| №    | <b>17a</b>      | <b>17b</b>           | <b>17c</b>           | <b>17d</b>           | <b>17e</b>           | <b>17f</b>           |
|------|-----------------|----------------------|----------------------|----------------------|----------------------|----------------------|
| H-14 | s 7.09          | s 7.02               | m 7.05               | s 7.06               | s 7.09               | s 7.07               |
| H-17 | m 7.45-<br>7.65 | s 7.81               | s 7.68               | s 7.64               | s 7.60               | s 7.85               |
| H-19 | m 7.45-<br>7.65 | s 7.71               | s 7.62               | s 7.61               | s 7.56               | s 7.71               |
| H-22 | m 6.82-<br>6.97 | d 6.77<br>(J=8.6 Hz) | d 6.78<br>(J=7.0 Hz) | m 6.82               | d 6.51<br>(J=7.9 Hz) | m 6.90               |
| H-23 | m 7.45-<br>7.65 | d 7.44<br>(J=8.6 Hz) | d 7.44<br>(J=7.0 Hz) | d 7.48<br>(J=7.3 Hz) | d 7.48<br>(J=8.3 Hz) | d 7.41<br>(J=8.1 Hz) |
| H-24 | s 5.00          | s 5.07               | s 5.09               | s 4.97               | s 5.00               | s 5.04               |
| H-25 | s 3.83          | s 3.79               | s 3.79               | s 3.82               | s 3.84               | s 3.83               |
| H-27 | m 6.82-<br>6.97 | m 6.90-7.10          | s 6.91               | m 7.01               |                      | d 8.47<br>(J=8.5 Hz) |
| H-28 | m 6.82-<br>6.97 | m 6.90-7.10          | m 7.05               |                      | d 6.82<br>(J=7.9 Hz) | m 6.90               |
| H-29 |                 | m 6.90-7.10          | m 7.05               |                      |                      |                      |
| H-30 | m 6.82-<br>6.97 |                      | m 7.05               | m 7.01               | t 6.41<br>(J=8.4 Hz) | m 7.12               |
| H-31 | m 6.82-<br>6.97 | m 6.90-7.10          |                      | m 6.82               |                      |                      |
| NH   | bs 8.92         | ---                  | bs 9.45              | bs 9.45              | bs 8.93              | bs 9.60              |
| OH-3 | s 18.78         | s 18.77              | s 18.76              | s 18.77              | s 18.78              | s 18.75              |
| OH-7 | ---             | ---                  | ---                  | ---                  | bs 12.21             | ---                  |
| OH-9 | s 10.24         | s 10.29              | s 10.23              | s 10.24              | s 10.23              | s 10.22              |

**Table S14:** Spectra NMR  $^{13}\text{C}$  of **17a-17f** ( $\text{CDCl}_3$ ,  $\delta$ ):

| <b>№</b> | <b>17a</b>             | <b>17b</b>             | <b>17c</b>             | <b>17d</b>             | <b>17e</b>              | <b>17f</b>             |
|----------|------------------------|------------------------|------------------------|------------------------|-------------------------|------------------------|
| C-17     | 142.43                 | 143.82                 | 143.09                 | 142.48                 | 142.30                  | 142.35                 |
| C-18     | 125.64                 | 125.43                 | 125.30                 | 125.01                 | 124.84                  | 125.12                 |
| C-19     | 127.14                 | 127.14                 | 127.13                 | 127.07                 | 127.11                  | 127.14                 |
| C-20     | 126.07                 | 125.93                 | 126.00                 | 126.04                 | 126.20                  | 126.28                 |
| C-21     | 158.06                 | 158.19                 | 158.08                 | 158.03                 | 158.10                  | 158.05                 |
| C-22     | 110.26                 | 110.21                 | 110.14                 | 110.25                 | 110.41                  | 110.34                 |
| C-23     | 127.69                 | 128.96                 | 127.93                 | 127.96                 | 128.06                  | 128.65                 |
| C-24     | 65.26                  | 65.91                  | 65.88                  | 65.32                  | 65.16                   | 65.22                  |
| C-25     | 55.47                  | 55.46                  | 55.36                  | 55.46                  | 55.53                   | 55.78                  |
| C-26     | d 154.74<br>(J=2.2 Hz) | d 146.61<br>(J=10 Hz)  | d 146.61<br>(J=11 Hz)  | d 154.81<br>(J=2.4 Hz) | t 160.57<br>(J=13.4 Hz) | d 150.14<br>(J=2.4 Hz) |
| C-27     | d 115.56<br>(J=12 Hz)  | 115.50                 | d 151.42<br>(J=247 Hz) | 116.44                 | d 162.68<br>(J=244 Hz)  | d 121.50<br>(J= 10Hz)  |
| C-28     | d 115.83<br>(J=3.2 Hz) | d 151.84<br>(J=249 Hz) | d 116<br>(J=16 Hz)     | 120.83<br>(J=19 Hz)    | t 96.47<br>(J=29 Hz)    | d 118.51<br>(J=28 Hz)  |
| C-29     | d 155.68<br>(J=239 Hz) | d 116.00<br>(J=19 Hz)  | d 121.24<br>(J=7 Hz)   | d 151.54<br>(J=247 Hz) | d 162.55<br>(J=244 Hz)  | d 156.08<br>(J=247 Hz) |
| C-30     | d 115.83<br>(J=3.2 Hz) | d 124.08<br>(J=3.5 Hz) | d 124.10<br>(J=3.4 Hz) | d 116.51<br>(J=22 Hz)  | m 98.50                 | d 114.06<br>(J=21 Hz)  |
| C-31     | d 115.56<br>(J=12 Hz)  | d 121.25<br>(J=8 Hz)   | 115.41                 | d 114.30<br>(J=6.7 Hz) | m 98.50                 | d 114.67<br>(J=9.4 Hz) |

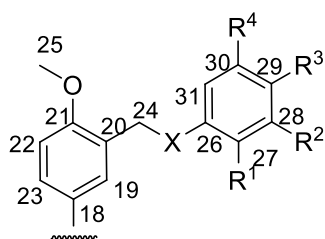

**17g** R<sup>1</sup>=t-Bu R<sup>2</sup>=H R<sup>3</sup>=H R<sup>4</sup>=Me X=S

**17h** R<sup>1</sup>=H R<sup>2</sup>=Me R<sup>3</sup>=Cl R<sup>4</sup>=H X=O

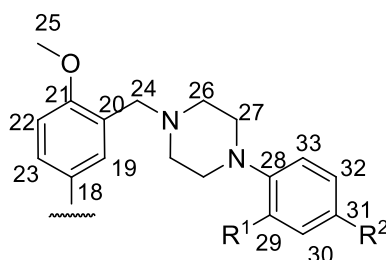

**17i** R<sup>1</sup>=H R<sup>2</sup>=F

**17j** R<sup>1</sup>=OMe R<sup>2</sup>=H

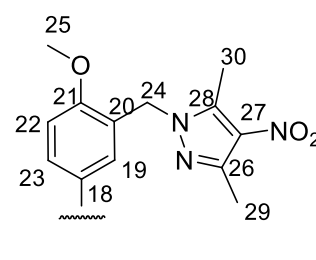

**17k**

**Table S15:** Spectra NMR<sup>1</sup>H of **17g-17k**(CDCl<sub>3</sub> for **g-j** and DMSO-d<sub>6</sub> for **k**, δ):

| №    | <b>17g</b>           | <b>17h</b>           | <b>17i</b>           | <b>17j</b>           | <b>17k</b>           |
|------|----------------------|----------------------|----------------------|----------------------|----------------------|
| H-14 | s 7.08               | s 7.07               | s 7.00               | s 6.98               | s 7.23               |
| H-17 | s 7.49               | s 7.69               | bs 7.98              | s 8.13               | s 7.26               |
| H-19 | s 7.32               | s 7.64               | bs 7.98              | s 8.05               | s 7.67               |
| H-22 | d 6.76<br>(J=8.5 Hz) | m 6.76               | d 6.56<br>(J=8.0 Hz) | d 6.46<br>(J=8.1 Hz) | d 7.08<br>(J=8.4 Hz) |
| H-23 | m 7.40               | d 7.51<br>(J=8.3 Hz) | m 7.34               | m 6.84-7.03          | d 7.50<br>(J=8.4 Hz) |
| H-24 | s 4.04               | s 4.99               | s 4.11               | s 4.19               | s 5.27               |
| H-25 | s 3.77               | s 3.84               | s 3.61               | bs 3.51              | s 3.85               |
| H-26 |                      |                      | s 3.29               | bs 3.51              |                      |
| H-27 | s 1.22 (t-Bu)        | d 6.88<br>(J=2.4 Hz) | s 3.48               | m 3.85               |                      |
| H-28 | m 7.23               | s 2.34 (Me)          |                      |                      |                      |
| H-29 | m 7.08               |                      | m 6.83-6.94          | m 6.84-7.03          | s 2.40               |
| H-30 | s 2.33 (Me)          | d 7.21<br>(J=8.6 Hz) | m 6.83-6.94          | m 3.85 (OMe)         | s 2.59               |
| H-31 | m 7.32               | d 6.83<br>(J=8.5 Hz) |                      | m 6.84-7.03          |                      |
| H-32 |                      |                      | m 6.83-6.94          | m 6.84-7.03          |                      |
| H-33 |                      |                      | m 6.83-6.94          | m 6.84-7.03          |                      |
| NH   | bs 9.09              | bs 9.56              | bs 11.22             | bs 11.22             | bs 12.28             |
| OH-3 | s 18.79              | s 18.79              | bs 18.7              | bs 18.76             | bs 18.80             |
| OH-7 | ---                  | ---                  | bs 12.64             | bs 12.63             | bs 12.77             |
| OH-9 | s 10.26              | s 10.27              | s 10.24              | s 10.23              | s 10.30              |

**Table S16:** Spectra NMR  $^{13}\text{C}$  of **17g-17k**( $\text{CDCl}_3$  for **g-j** and  $\text{DMSO-d}_6$  for **k**,  $\delta$ ):

| <b>N<sup>o</sup></b> | <b>17g</b>                                        | <b>17h</b>           | <b>17i</b>              | <b>17j</b>                                       | <b>17k</b> |
|----------------------|---------------------------------------------------|----------------------|-------------------------|--------------------------------------------------|------------|
| C-17                 | 142.74                                            | 143.61               | 141.77                  | 141.03                                           | 142.40     |
| C-18                 | 125.70                                            | 125.47               | 127.27                  | 127.72                                           | 123.52     |
| C-19                 | 127.77                                            | 127.19               | 129.01                  | 129.77                                           | 126.09     |
| C-20                 | 126.47                                            | 125.90               | 127.27                  | 127.72                                           | 126.99     |
| C-21                 | 158.61                                            | 158.08               | 158.70                  | 158.36                                           | 157.16     |
| C-22                 | 110.38                                            | 110.21               | 110.52                  | 110.89                                           | 110.26     |
| C-23                 | 128.79                                            | 129.46               | 131.17                  | 131.96                                           | 128.05     |
| C-24                 | 32.56                                             | 64.74                | 48.25                   | 47.48                                            | 47.97      |
| C-25                 | 55.50                                             | 55.45                | 55.35                   | 55.26                                            | 55.41      |
| C-26                 | 134.44                                            | 157.12               | 54.52                   | 54.64                                            | 140.77     |
| C-27                 | 149.06 ( $\text{C}_{\text{Ar}}$ )<br>31.09 (t-Bu) | 113.28               | 51.98                   | 52.05                                            | 145.97     |
| C-28                 | 129.57                                            | 127.92<br>20.25 (Me) | 146.65                  | 151.77                                           | 130.90     |
| C-29                 | 128.79                                            | 136.97               | d 115.45<br>(J=22 Hz)   | 139.11 ( $\text{C}_{\text{Ar}}$ )<br>54.96(O-Me) | 11.32      |
| C-30                 | 135.72 ( $\text{C}_{\text{Ar}}$ )<br>19.73 (Me)   | 126.01               | d 118.53<br>(J=7.43 Hz) | 110.89                                           | 14.07      |
| C-31                 | 123.63                                            | 117.22               | d 156.02<br>(J=240 Hz)  | 118.75                                           |            |
| C-32                 |                                                   |                      | d 118.53<br>(J=7.43 Hz) | 124.02                                           |            |
| C-33                 |                                                   |                      | d 115.45<br>(J=22 Hz)   | 121.04                                           |            |

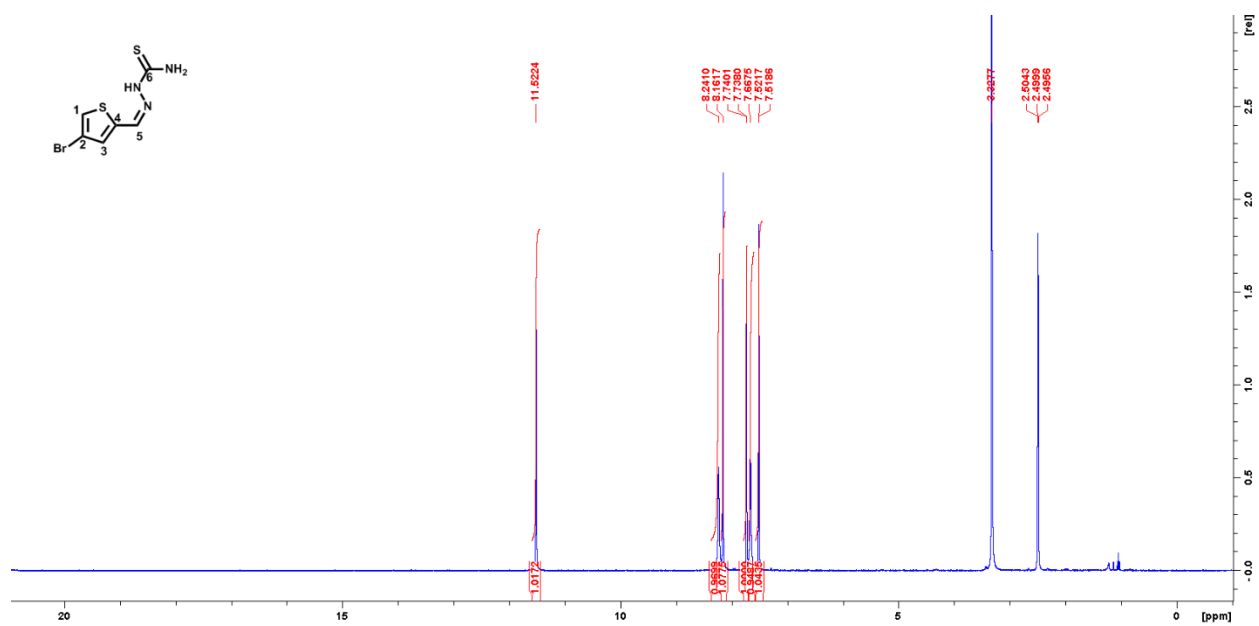

Figure S1: NMR <sup>1</sup>H spectra of 11h

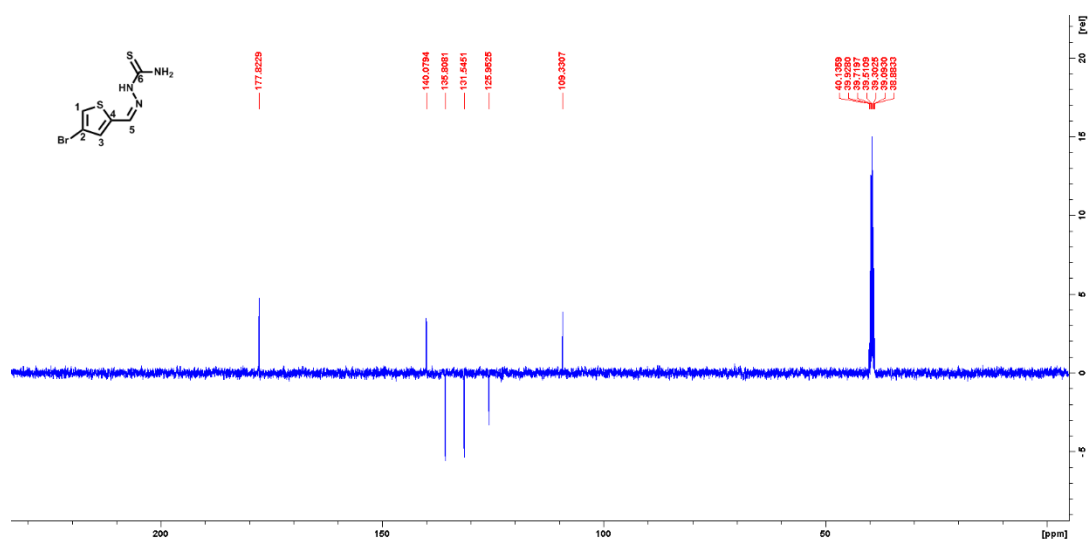

Figure S2: NMR <sup>13</sup>C (J-MOD) spectra of 11h





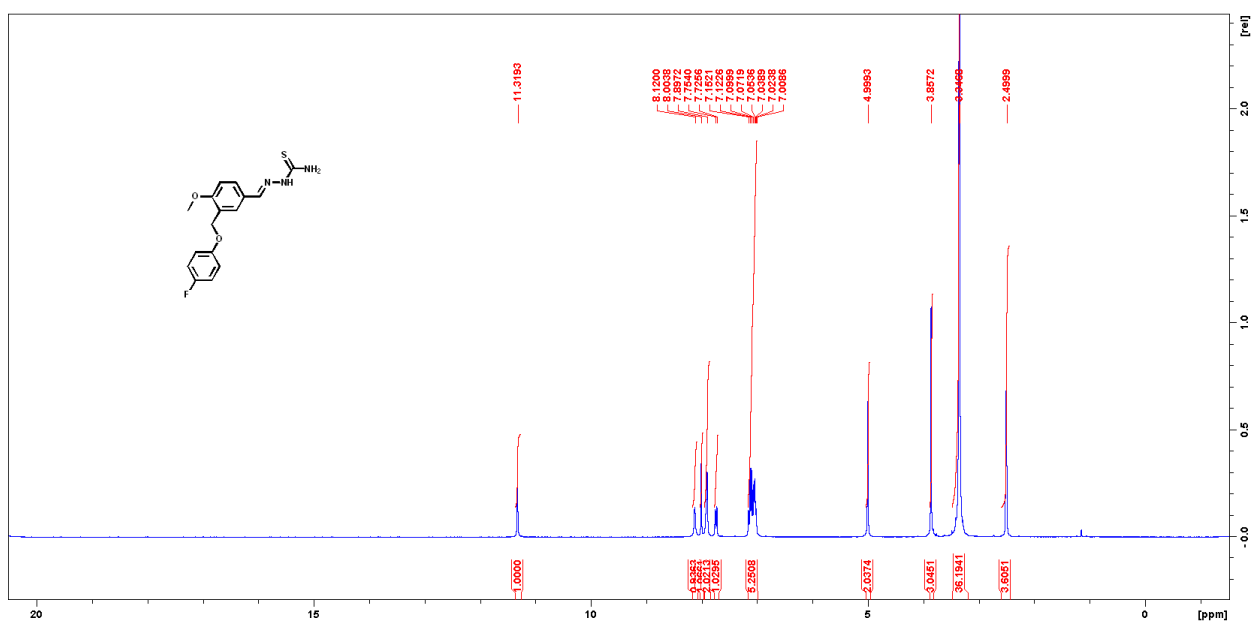

Figure S5: NMR  $^1\text{H}$  spectra of **12a**

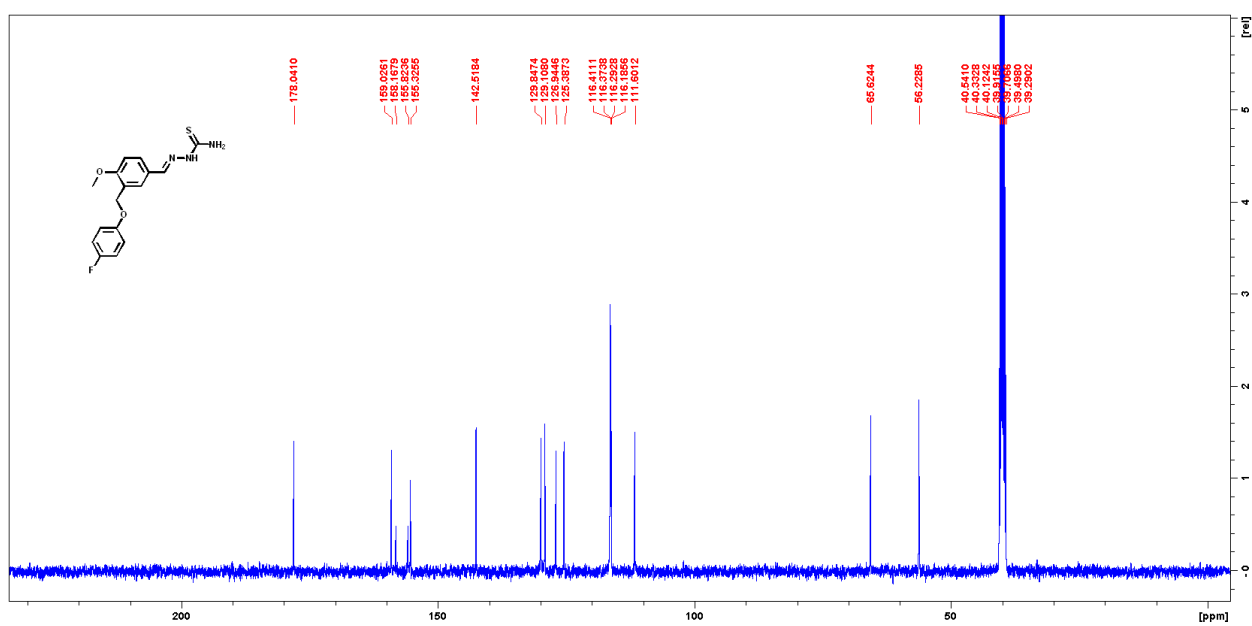

Figure S6: NMR  $^{13}\text{C}$  spectra of **12a**

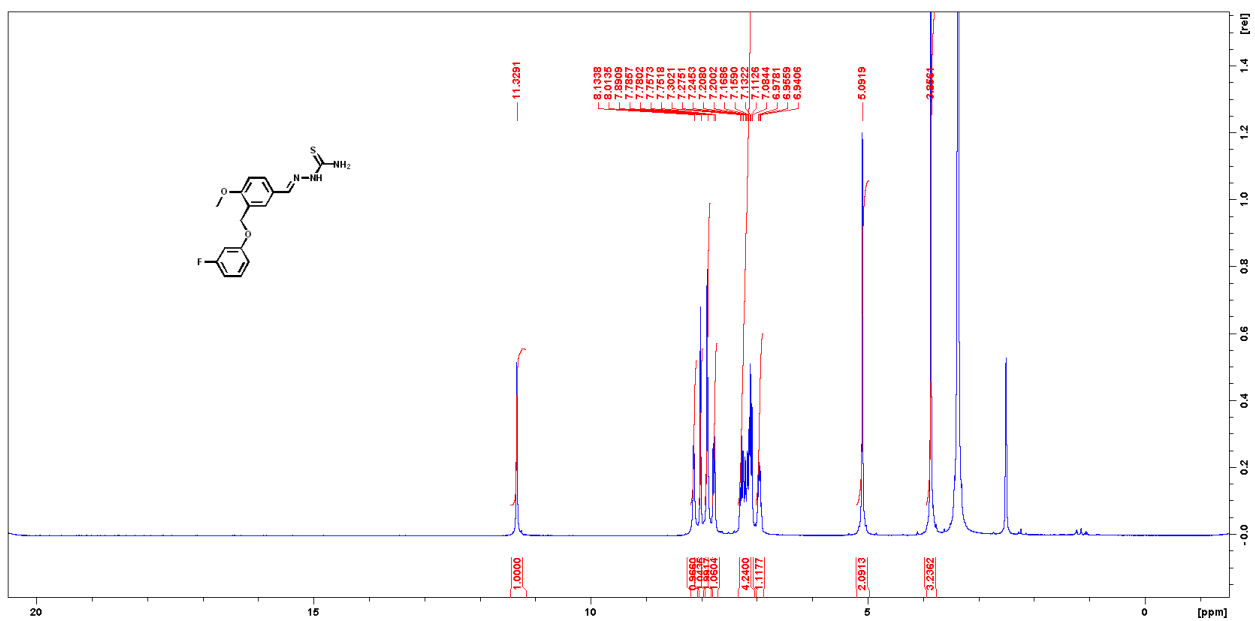

Figure S7: NMR  $^1\text{H}$  spectra of **12b**

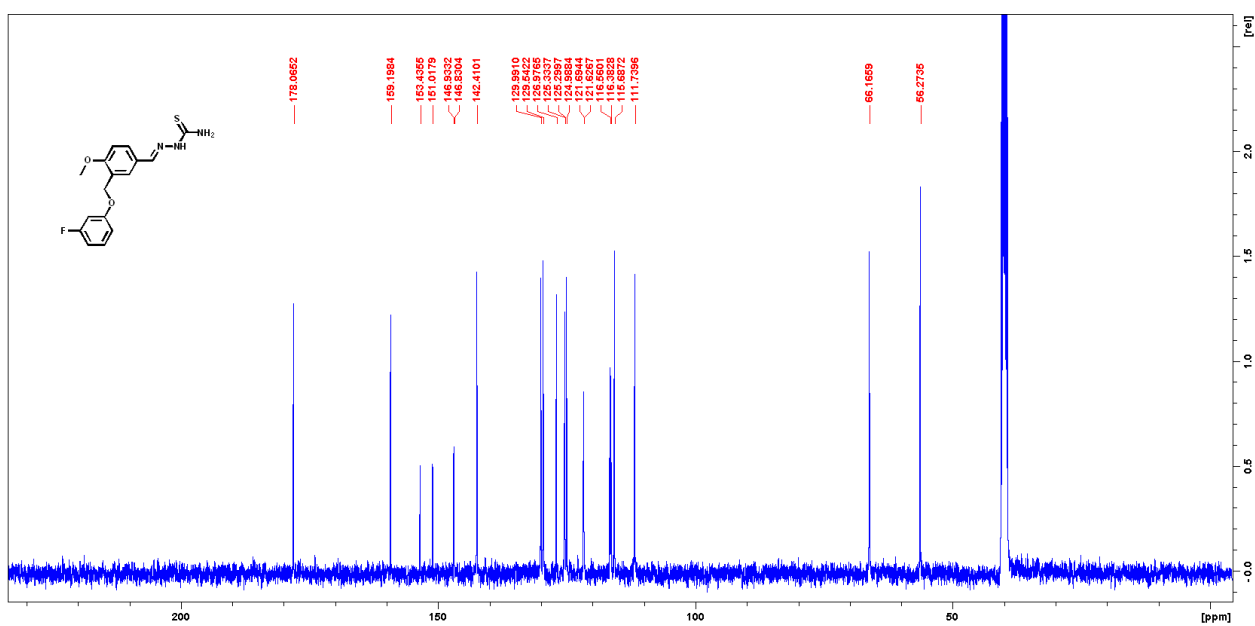

Figure S 8: NMR  $^{13}\text{C}$  spectra of **12b**

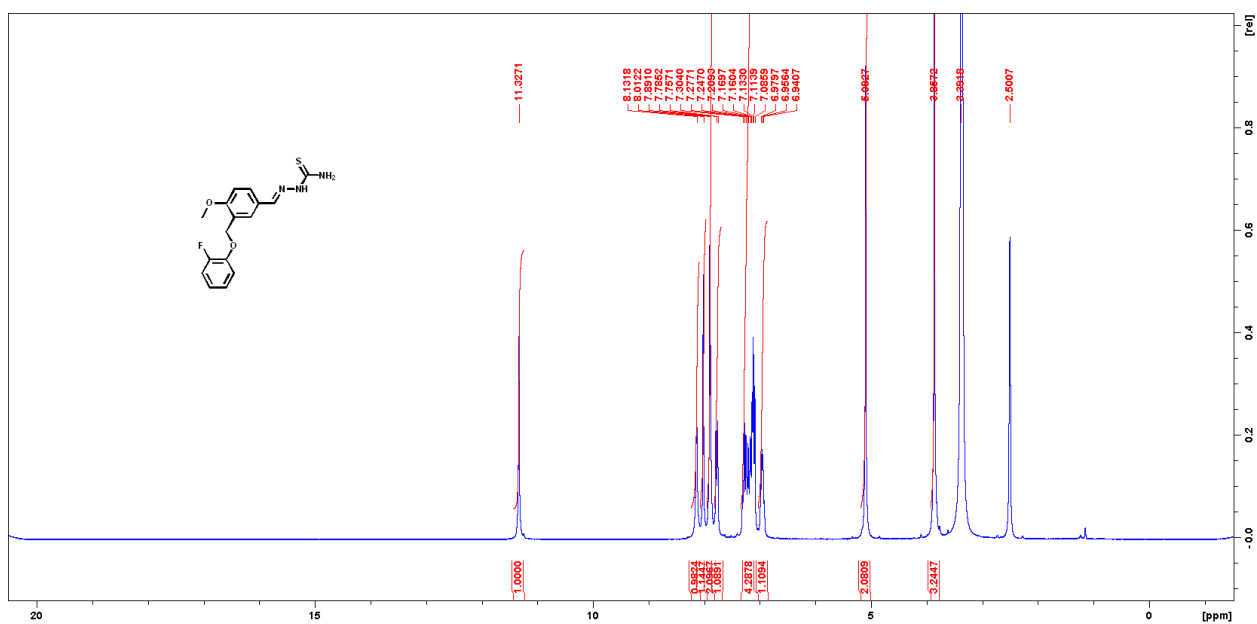

Figure S9: NMR  $^1\text{H}$  spectra of **12c**

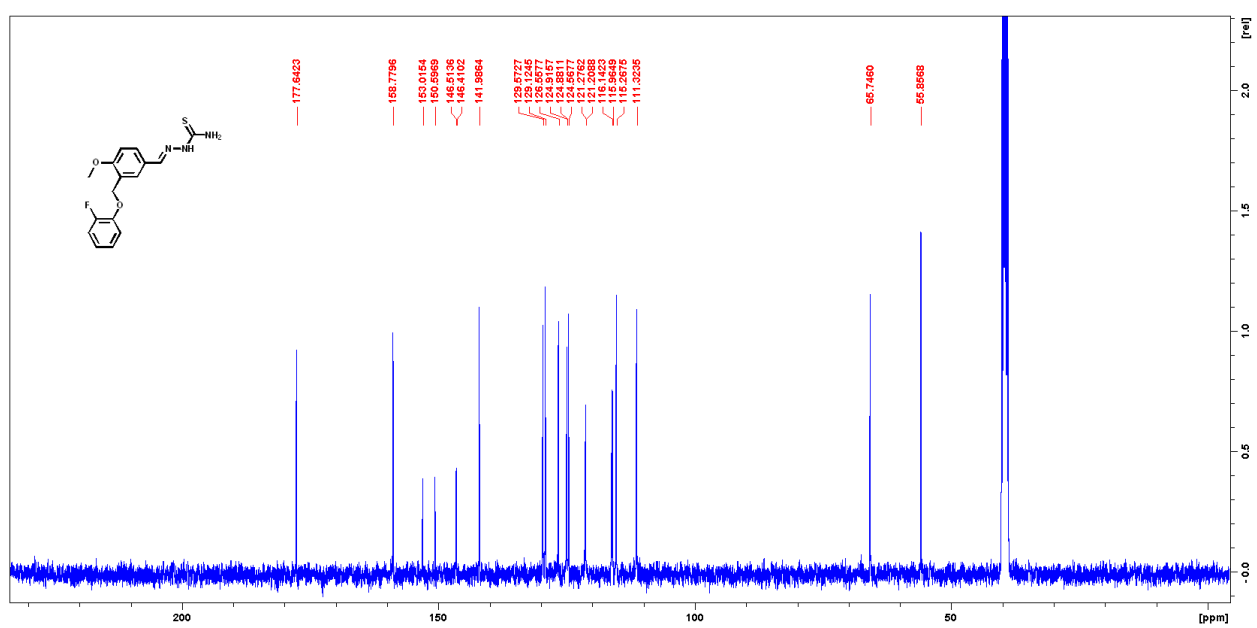

Figure S10: NMR  $^{13}\text{C}$  spectra of **12c**

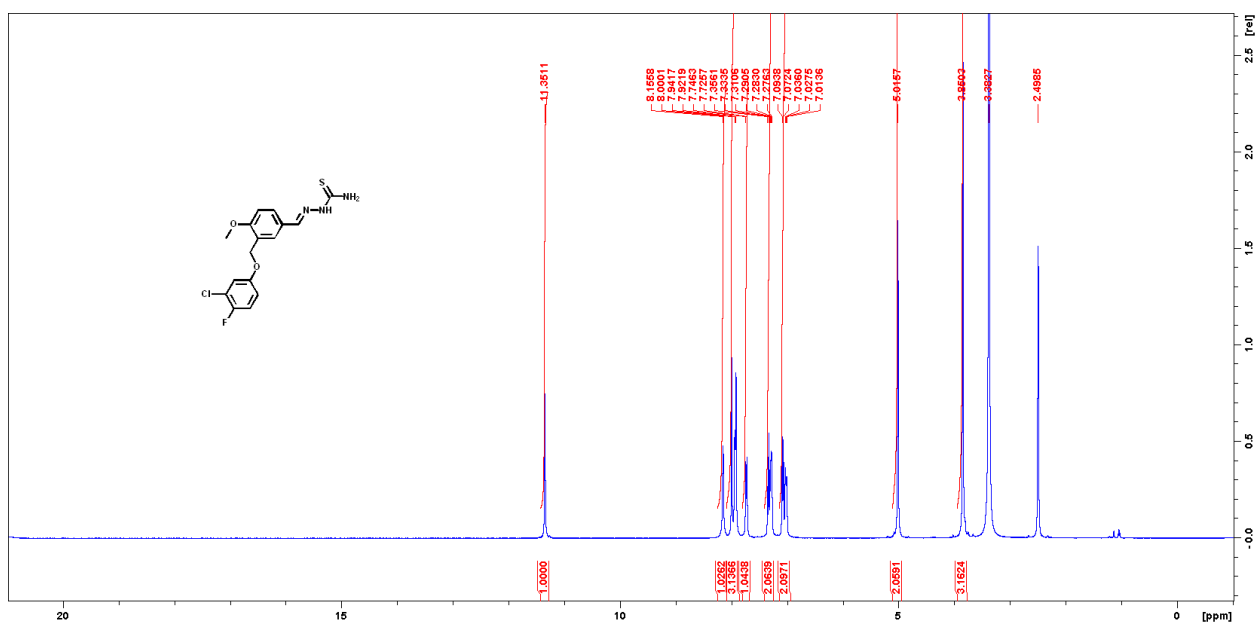

Figure S11: NMR <sup>1</sup>H spectra of 12d

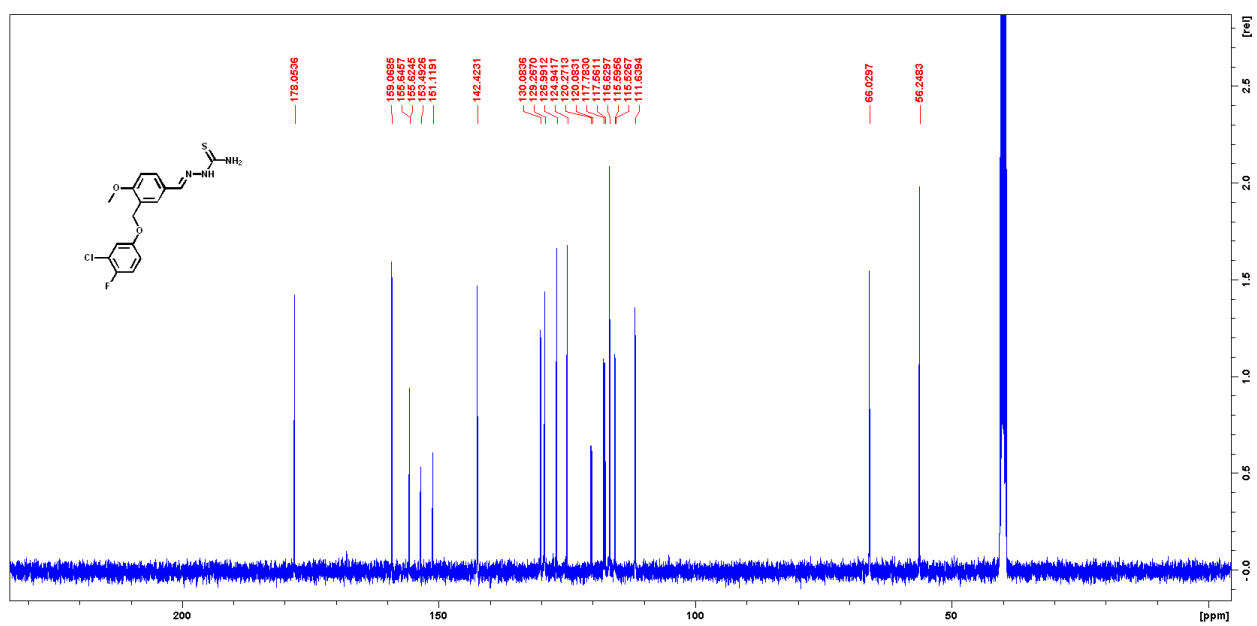

Figure S12: NMR <sup>13</sup>C spectra of 12d

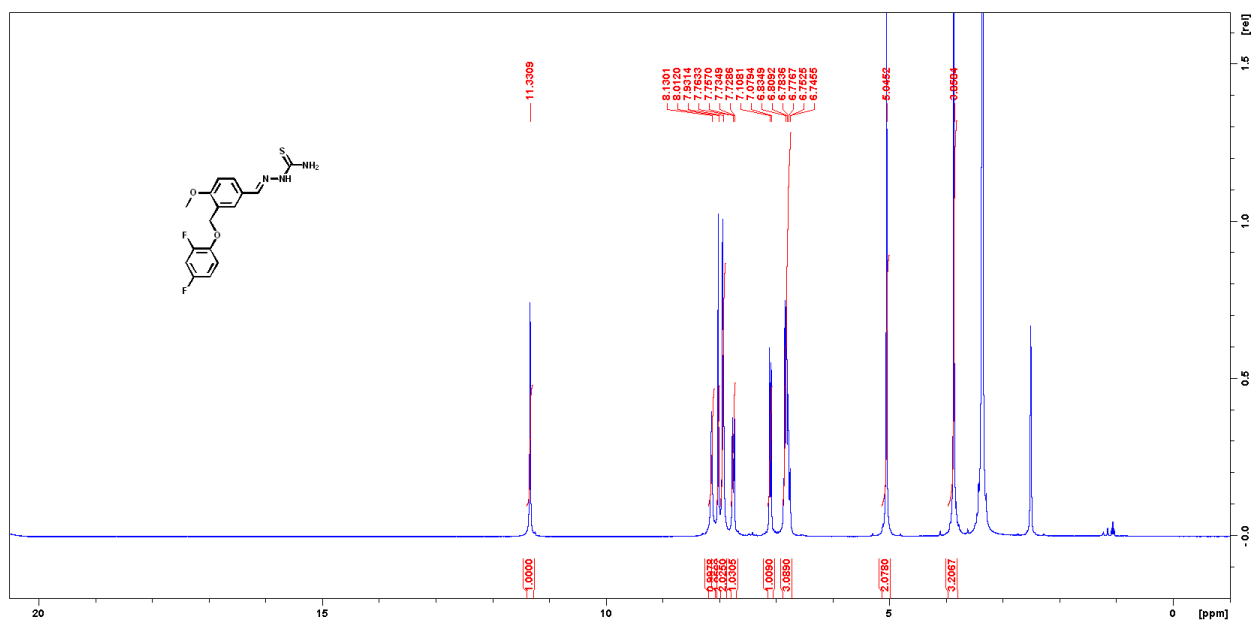

Figure S13: NMR  $^1\text{H}$  spectra of 12e

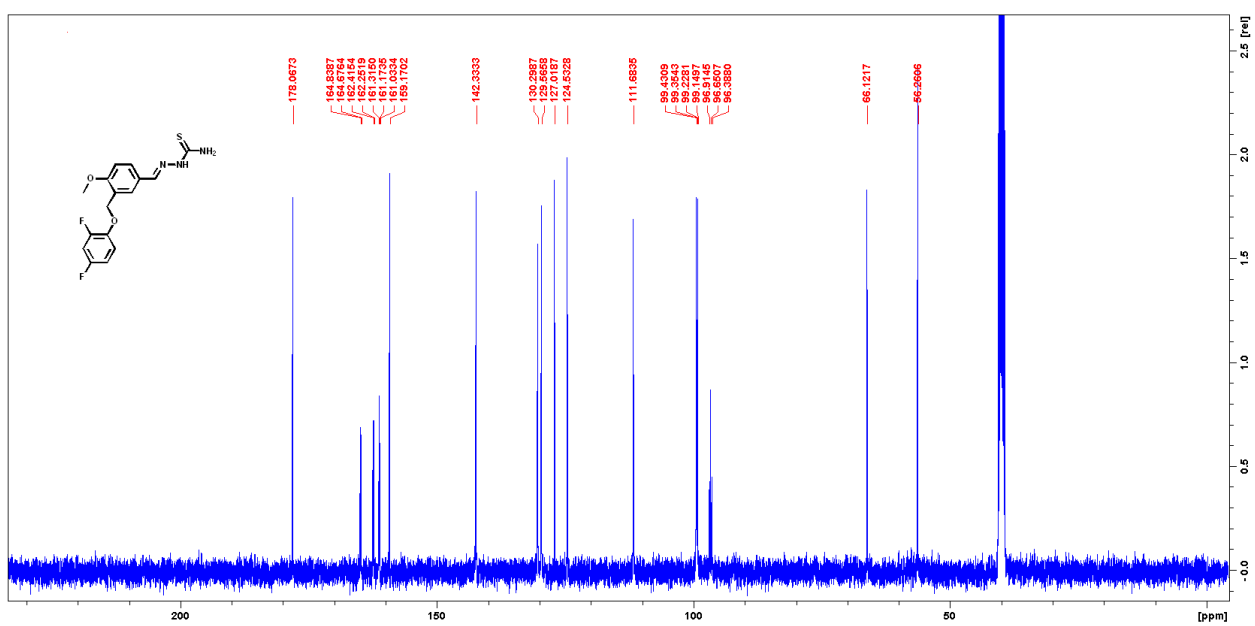

Figure S14: NMR  $^{13}\text{C}$  spectra of 12e

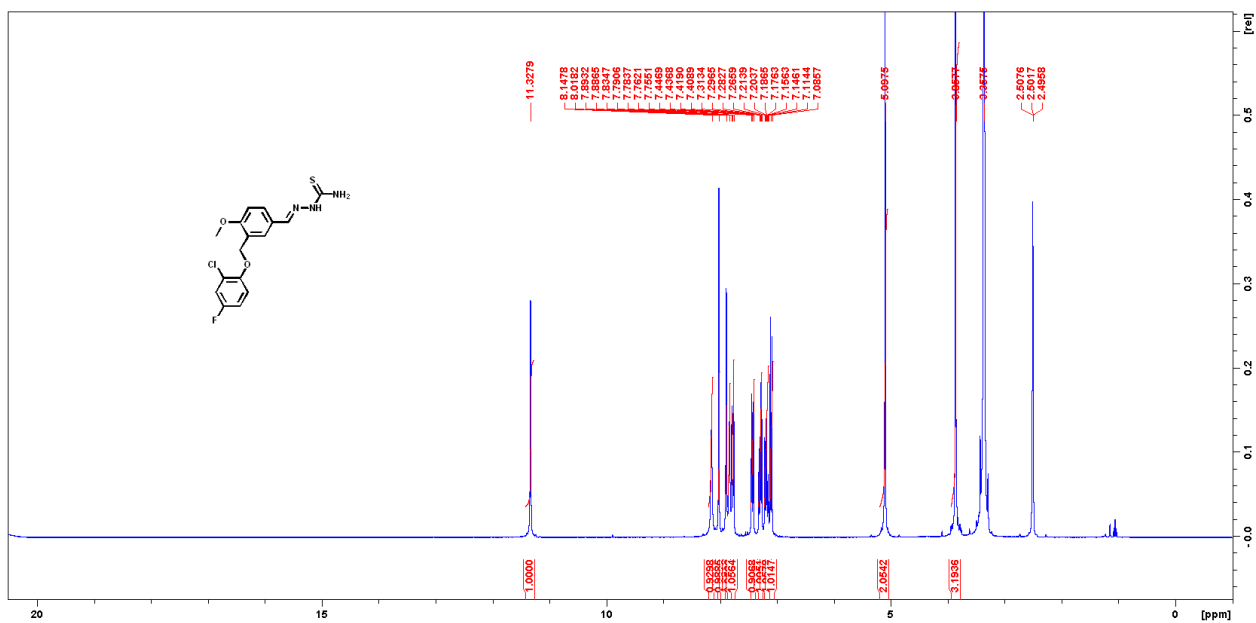

Figure S15: NMR  $^1\text{H}$  spectra of **12f**

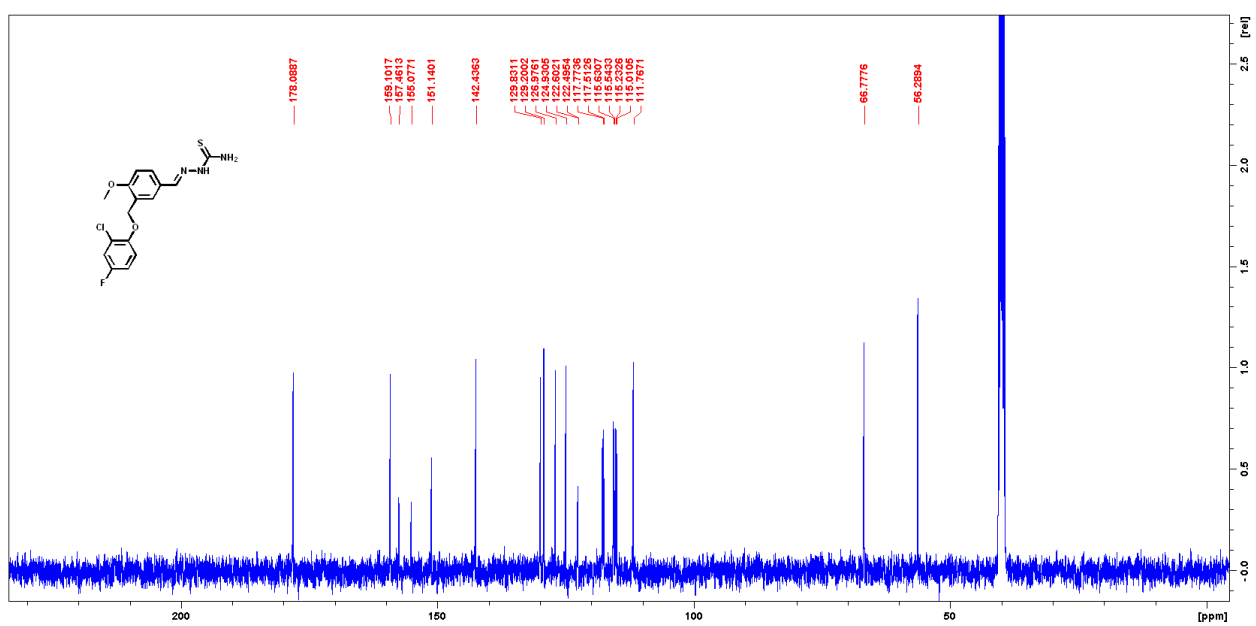

Figure S16: NMR  $^{13}\text{C}$  spectra of **12f**

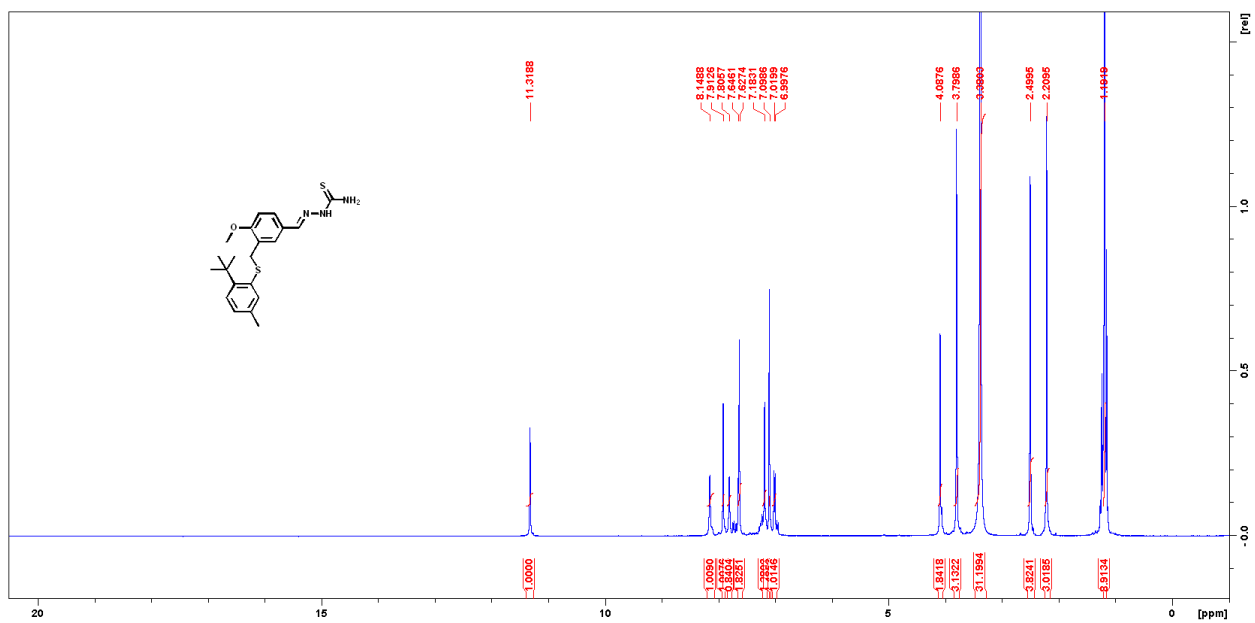

Figure S17: NMR  $^1\text{H}$  spectra of **12g**

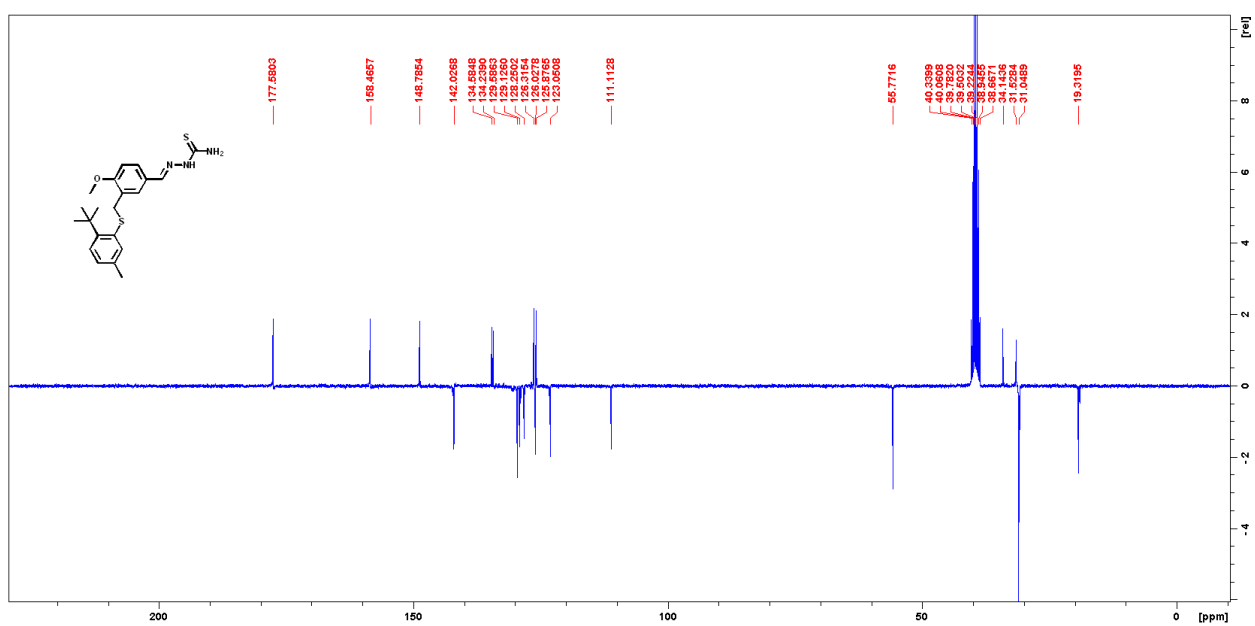

Figure S18: NMR  $^{13}\text{C}$  (J-MOD) spectra of **12g**



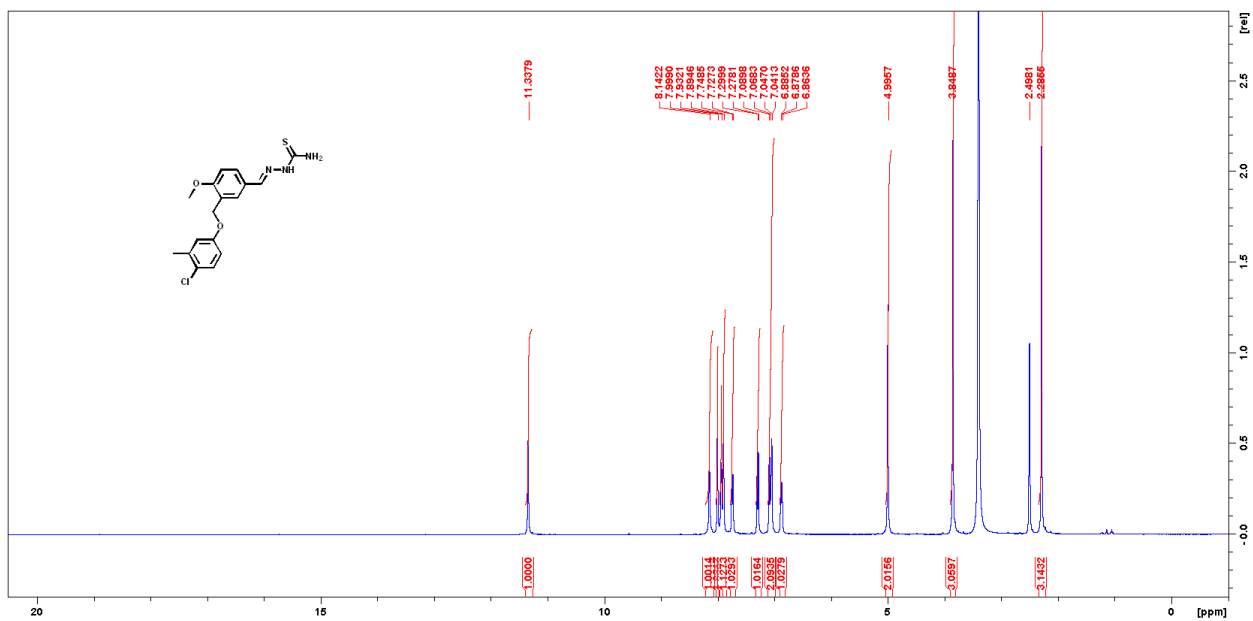

Figure S19: NMR  $^1\text{H}$  spectra of 12h

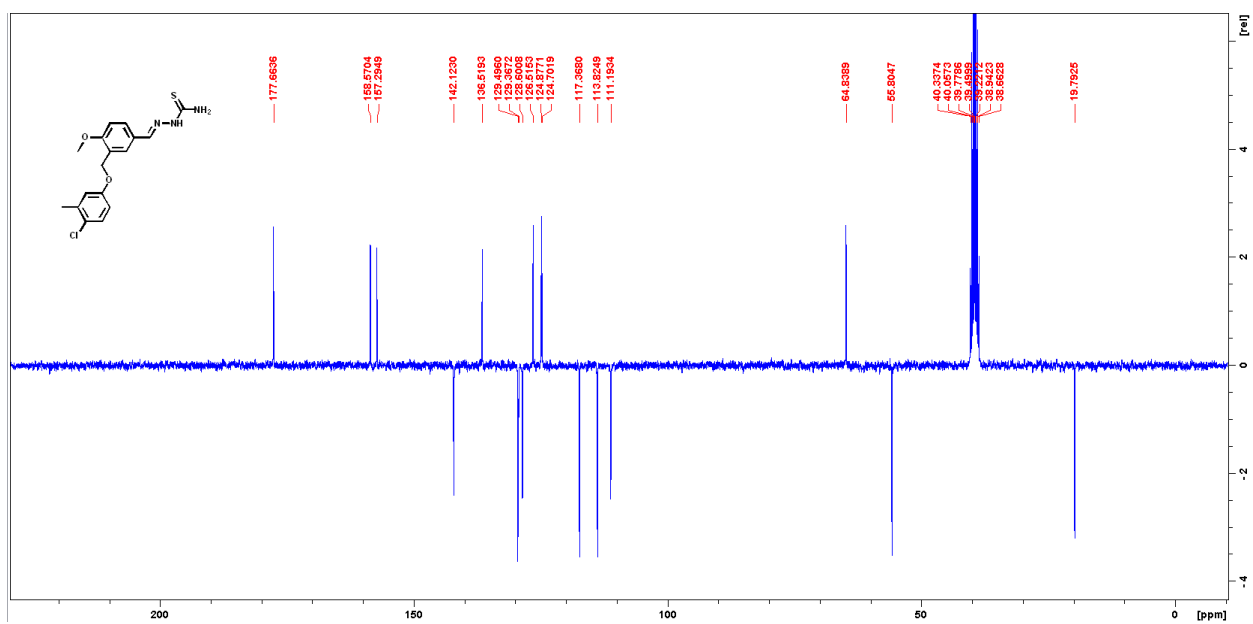

Figure S20: NMR  $^{13}\text{C}$  (J-MOD) spectra of 12h

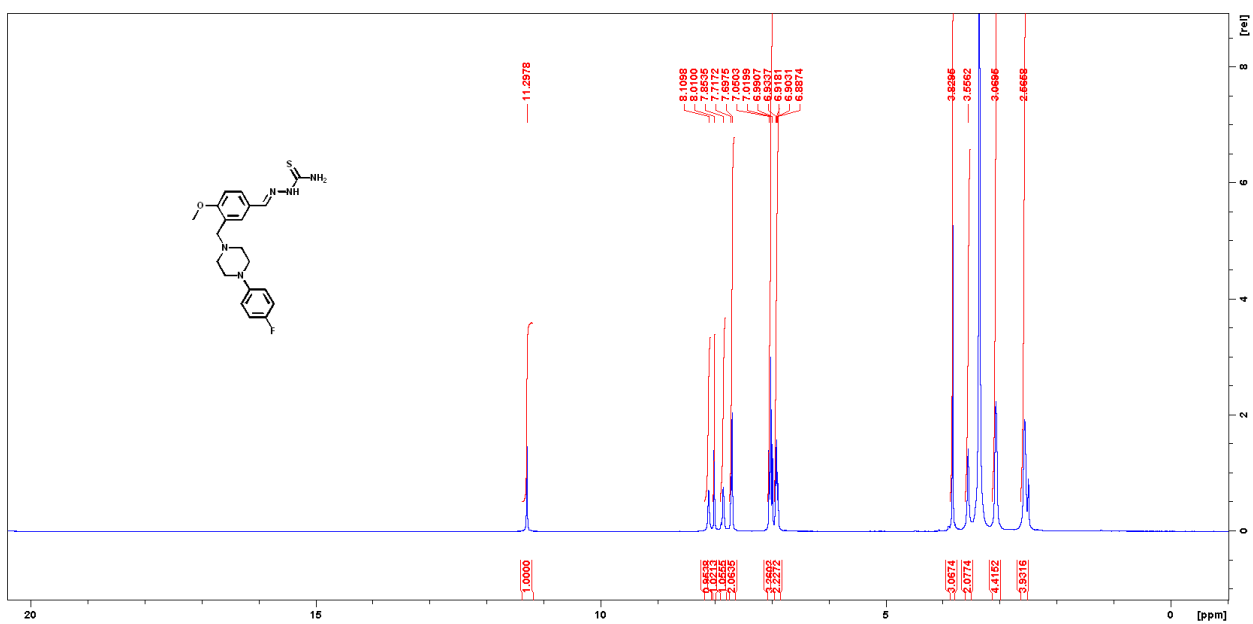

Figure S21: NMR  $^1\text{H}$  spectra of **12i**

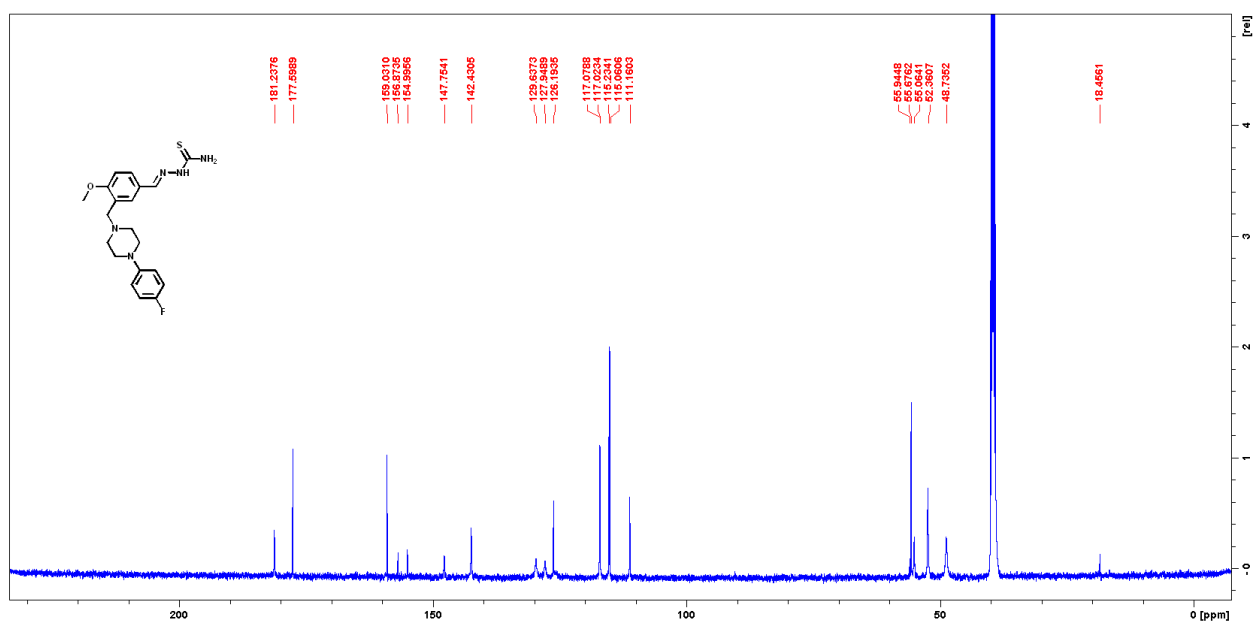

Figure S22: NMR  $^{13}\text{C}$  spectra of **12i**

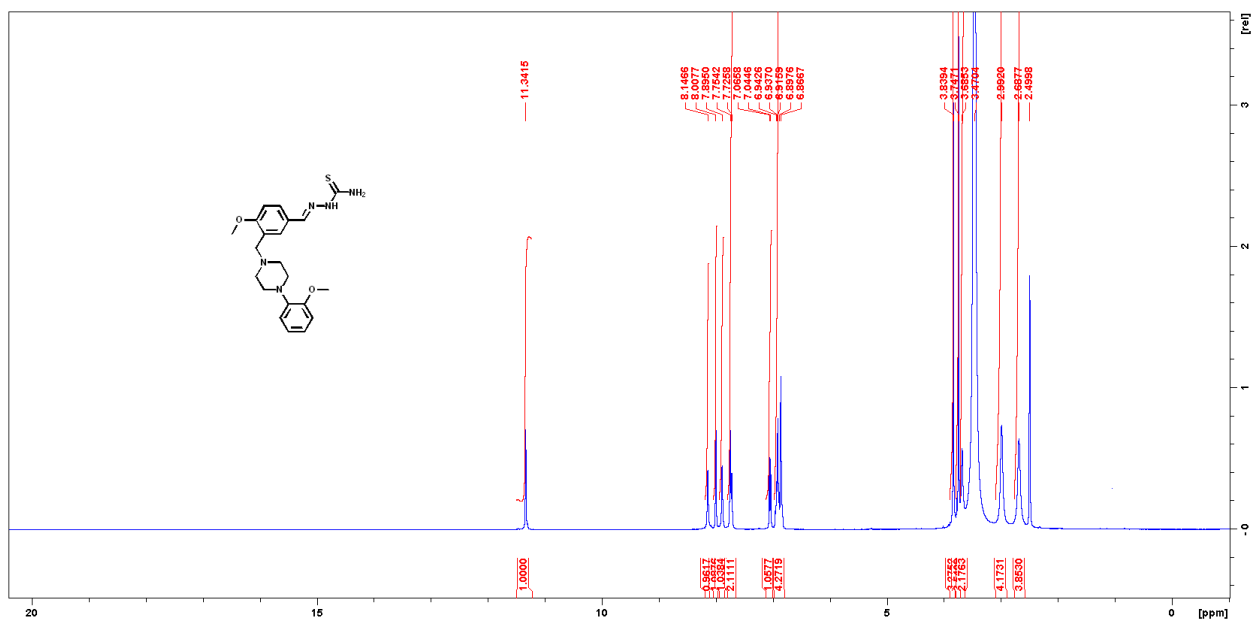

Figure S23: NMR  $^1\text{H}$  spectra of **12j**

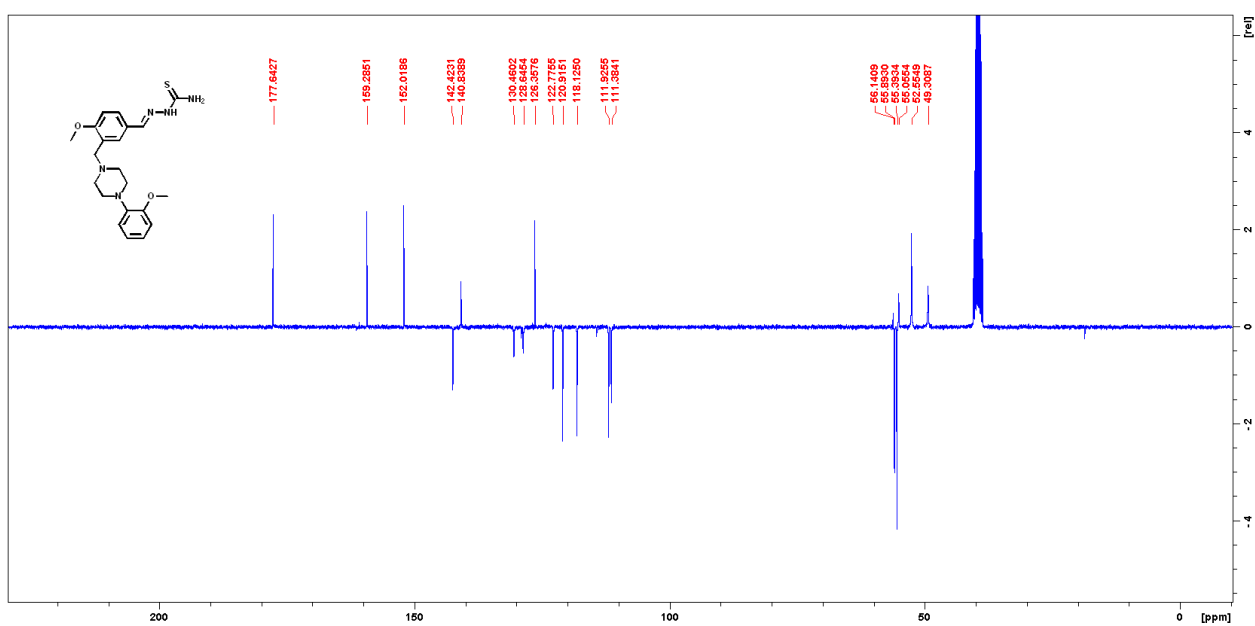

Figure S24: NMR  $^{13}\text{C}$  (J-MOD) spectra of **12j**



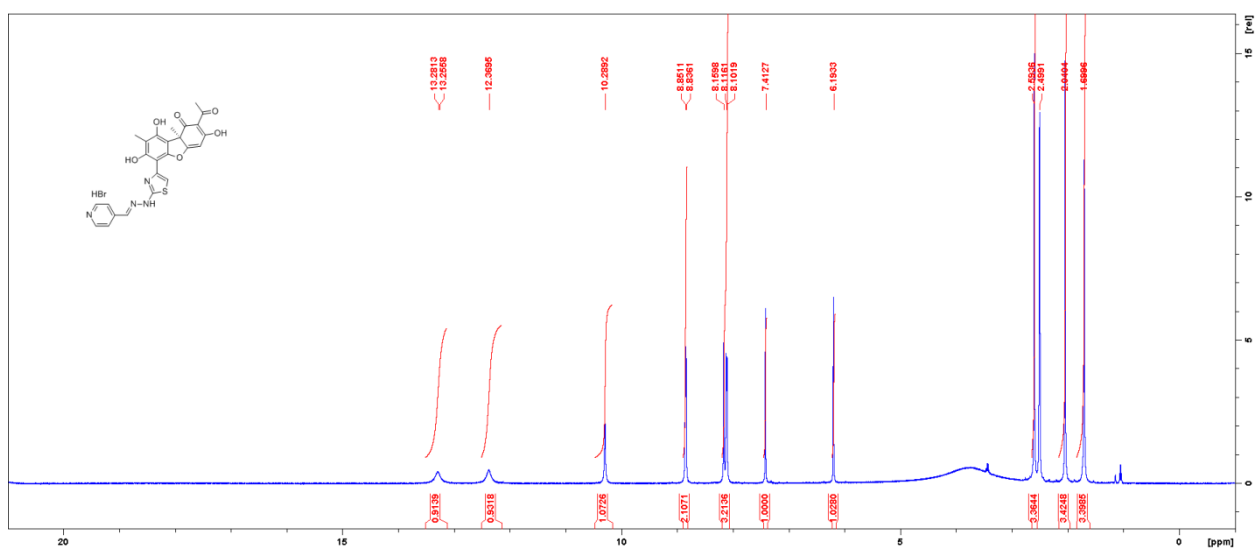

Figure S27: NMR  $^1\text{H}$  spectra of **16a**

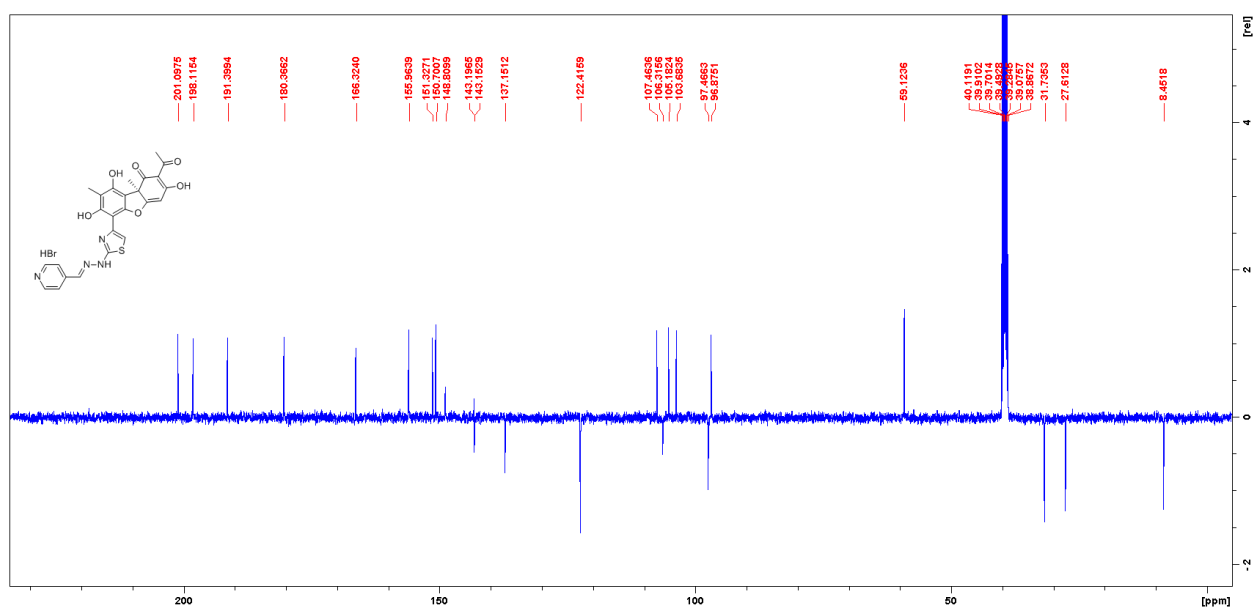

Figure S28: NMR  $^{13}\text{C}$  (J-MOD) spectra of **16a**

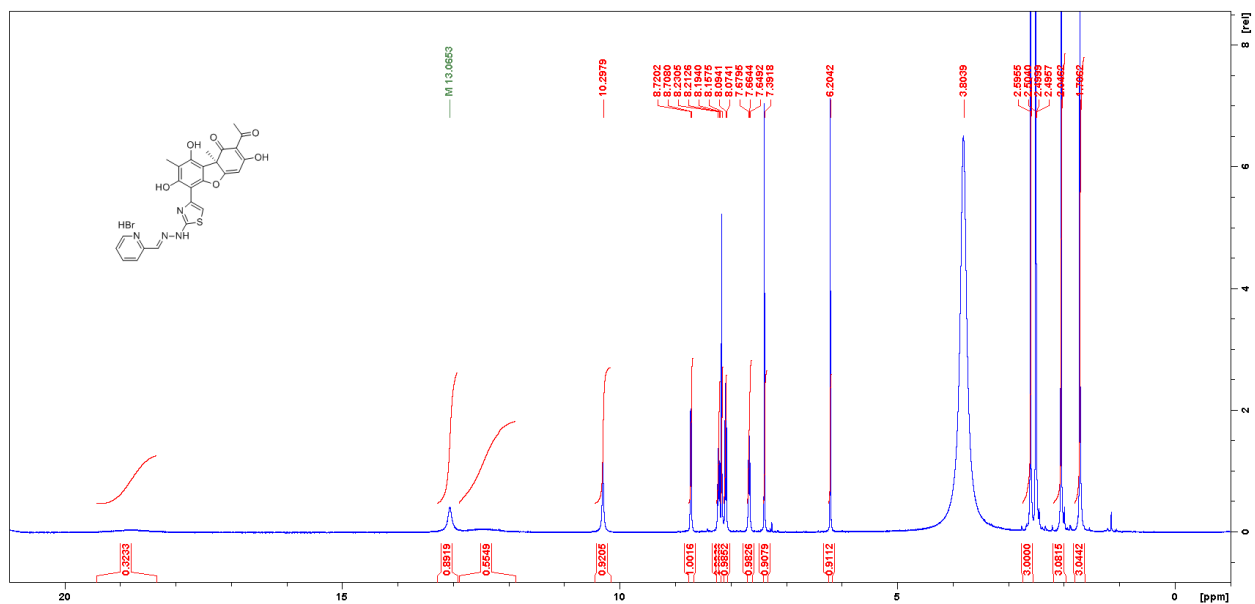

Figure S29: NMR  $^1\text{H}$  spectra of **16b**

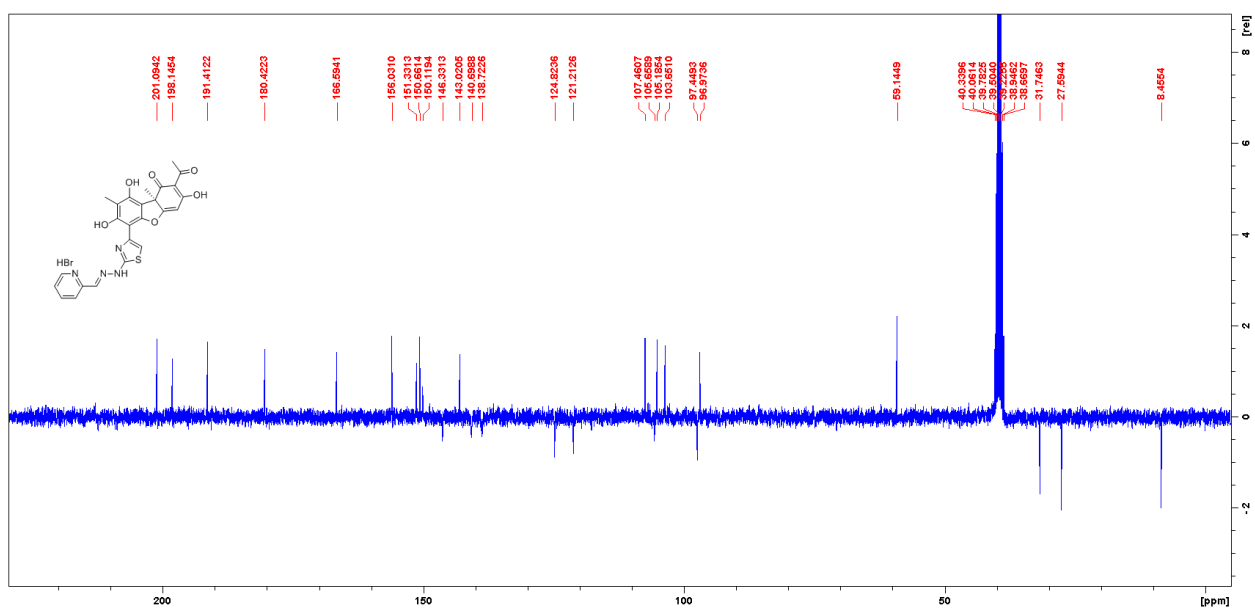

Figure S30: NMR  $^{13}\text{C}$  (J-MOD) spectra of **16b**

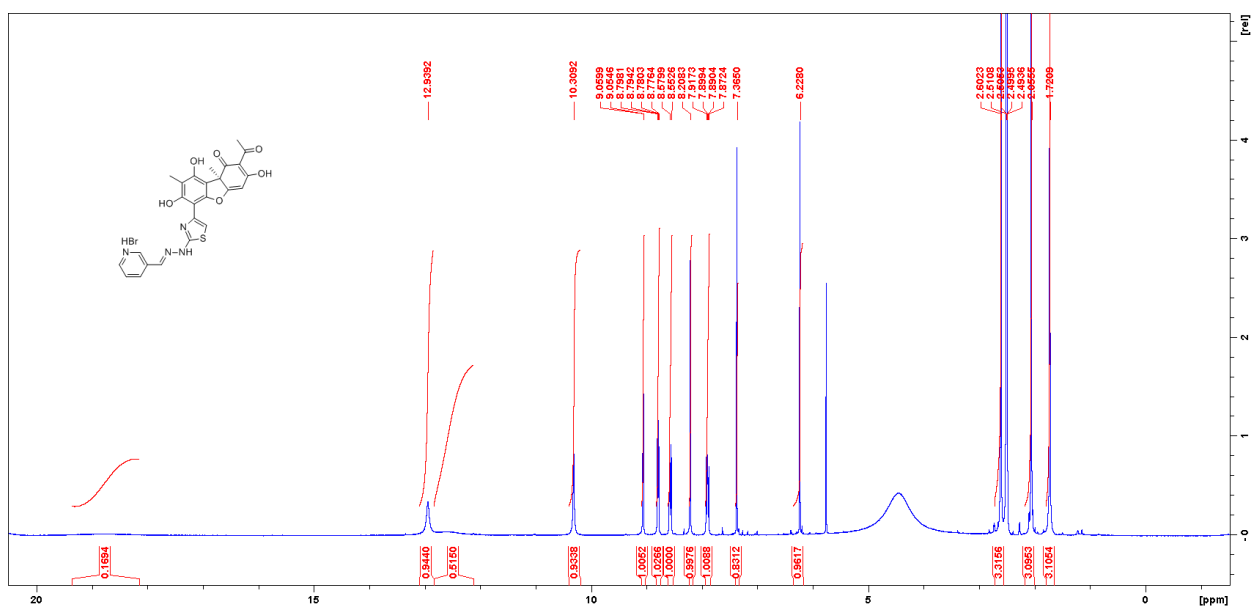

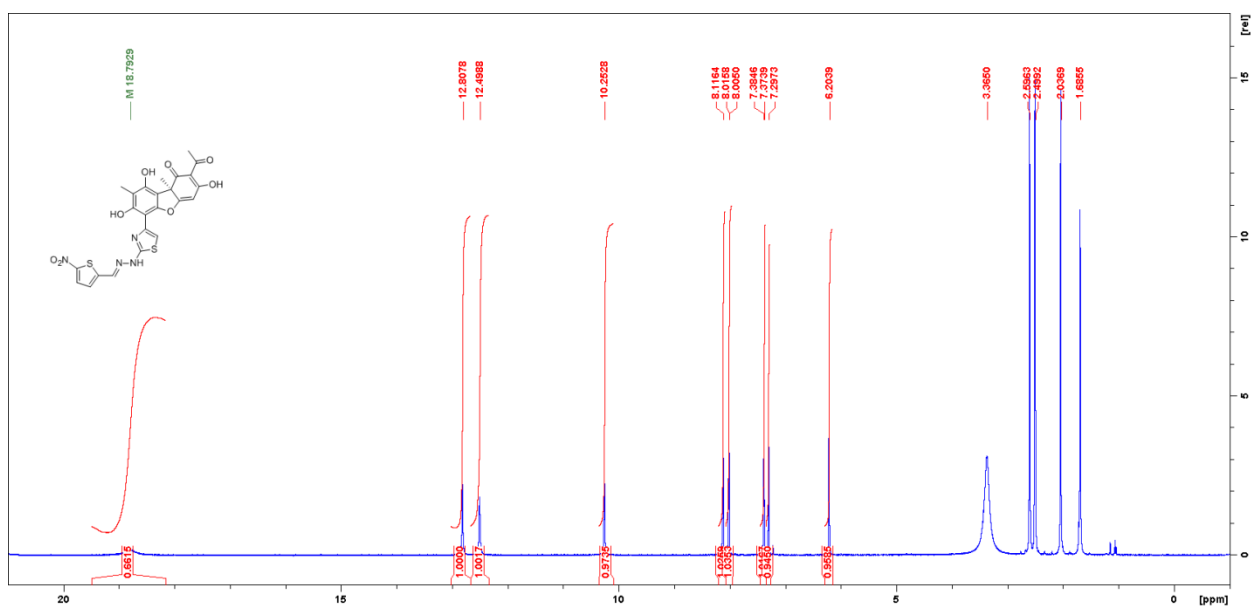

Figure S33: NMR  $^1\text{H}$  spectra of **16d**

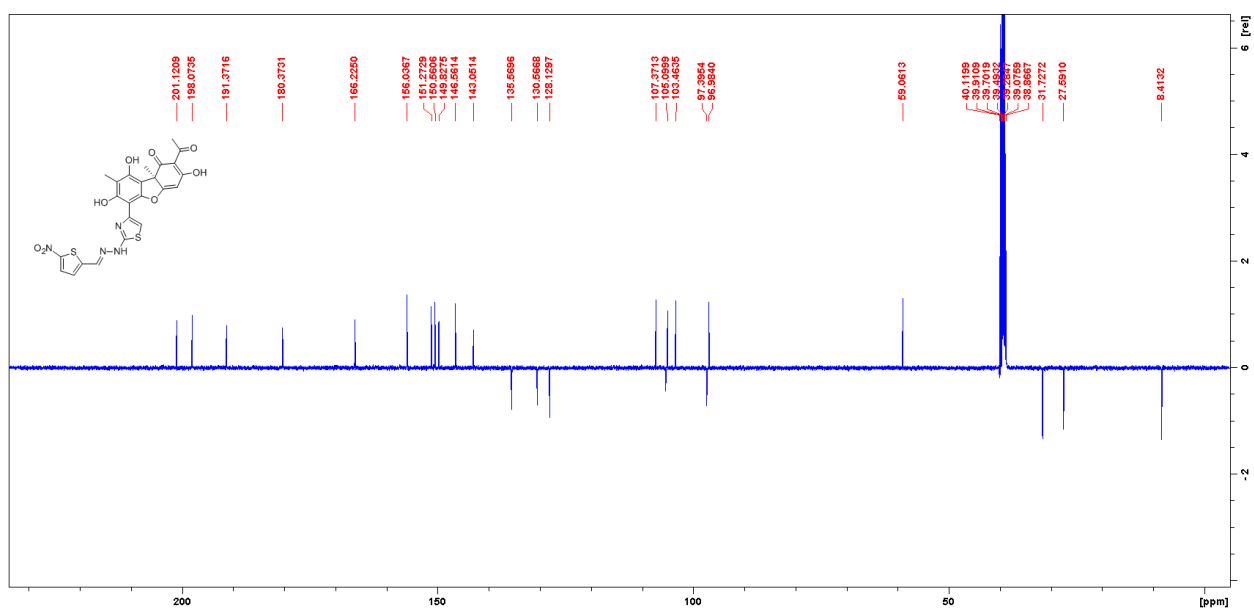

Figure S34: NMR  $^{13}\text{C}$  (J-MOD) spectra of **16d**





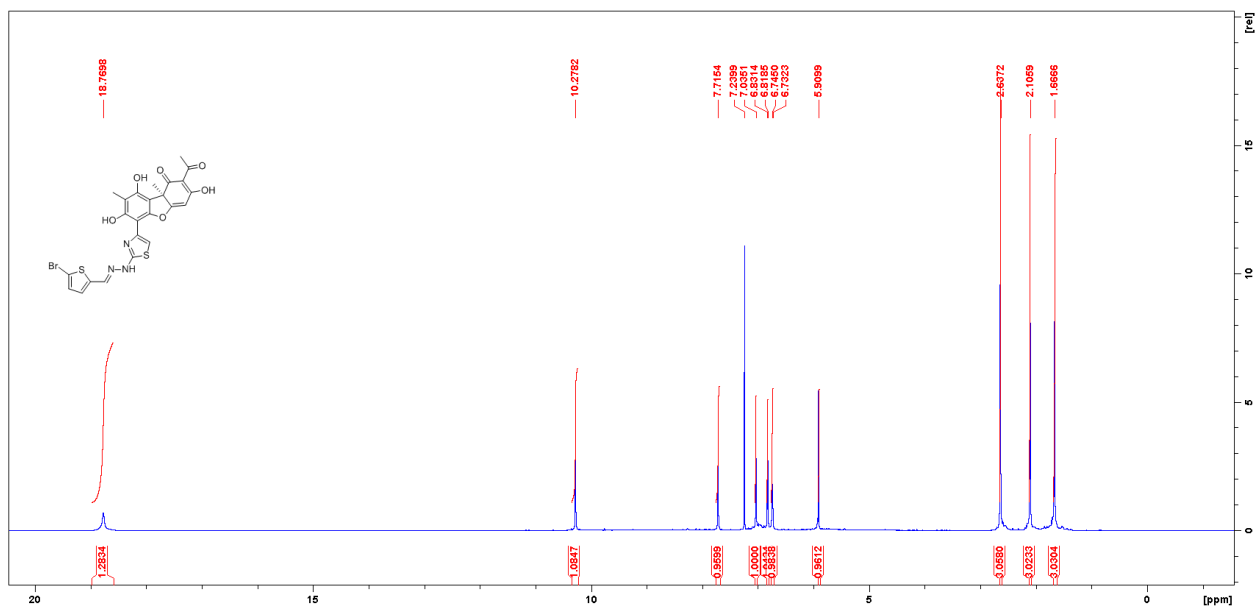

Figure S37: NMR  $^1\text{H}$  spectra of **16f**

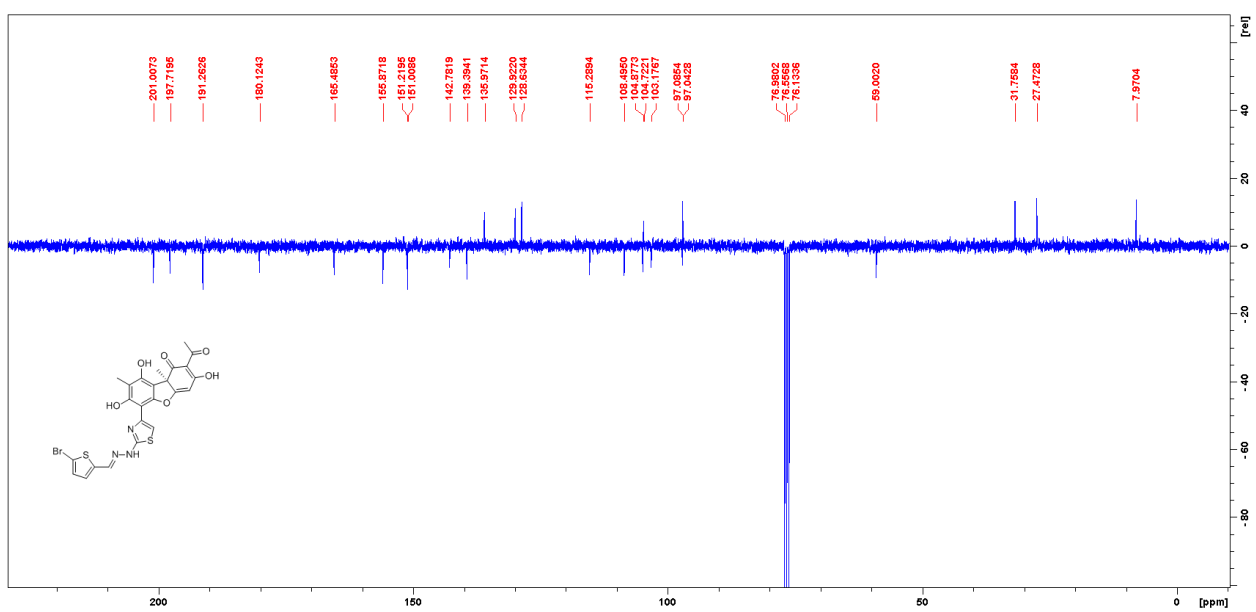

Figure S38: NMR  $^{13}\text{C}$  (J-MOD) spectra of **16f**

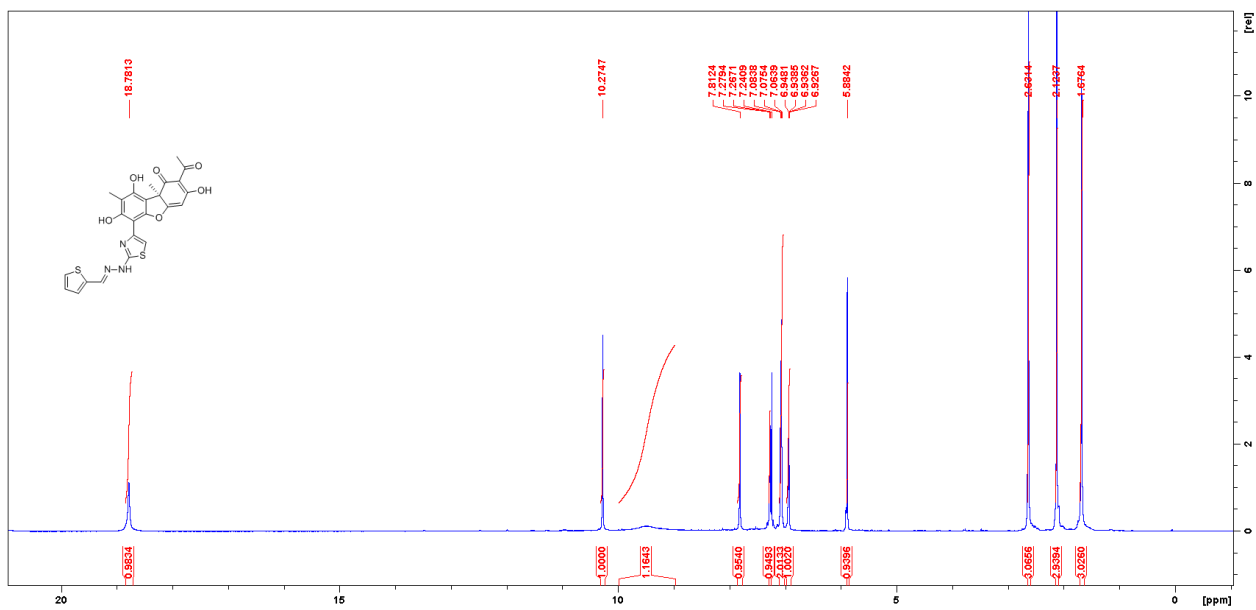

Figure S39: NMR  $^1\text{H}$  spectra of 16g

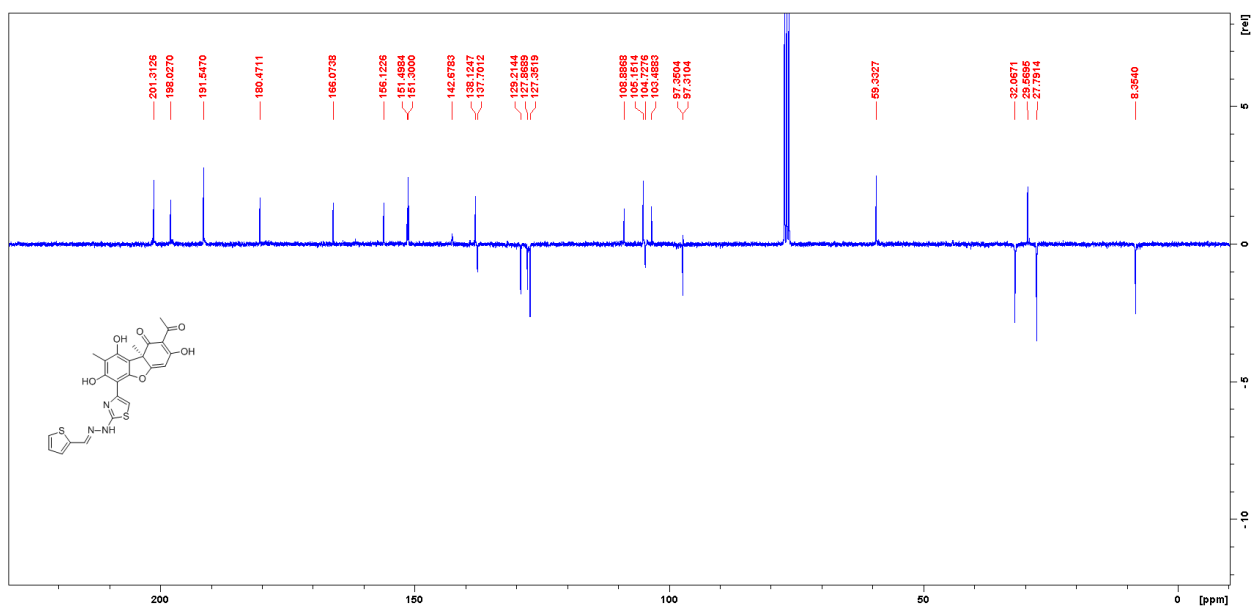

Figure S40: NMR  $^{13}\text{C}$  (J-MOD) spectra of 16g

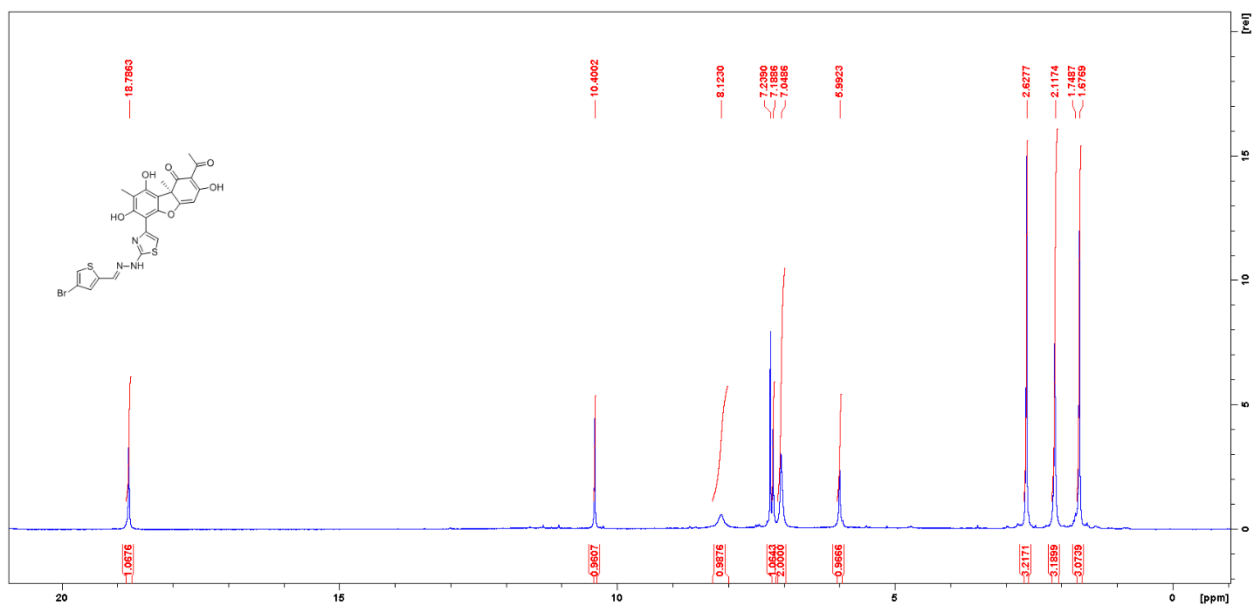

Figure S41: NMR  $^1\text{H}$  spectra of 16h

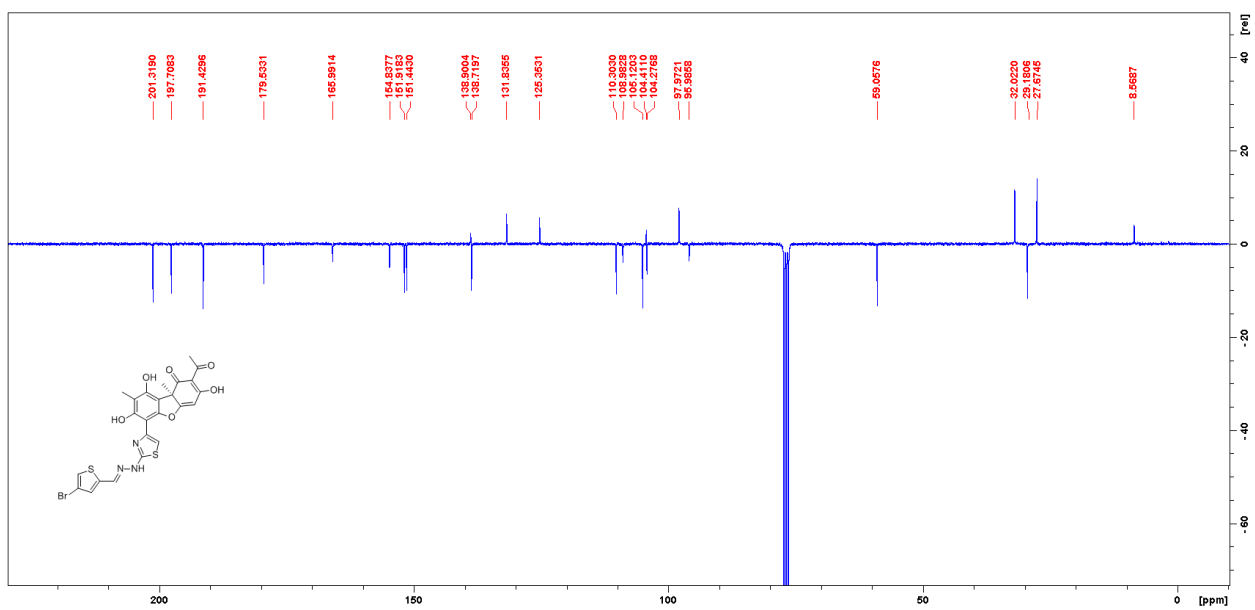

Figure S42: NMR  $^{13}\text{C}$  (J-MOD) spectra of 16h

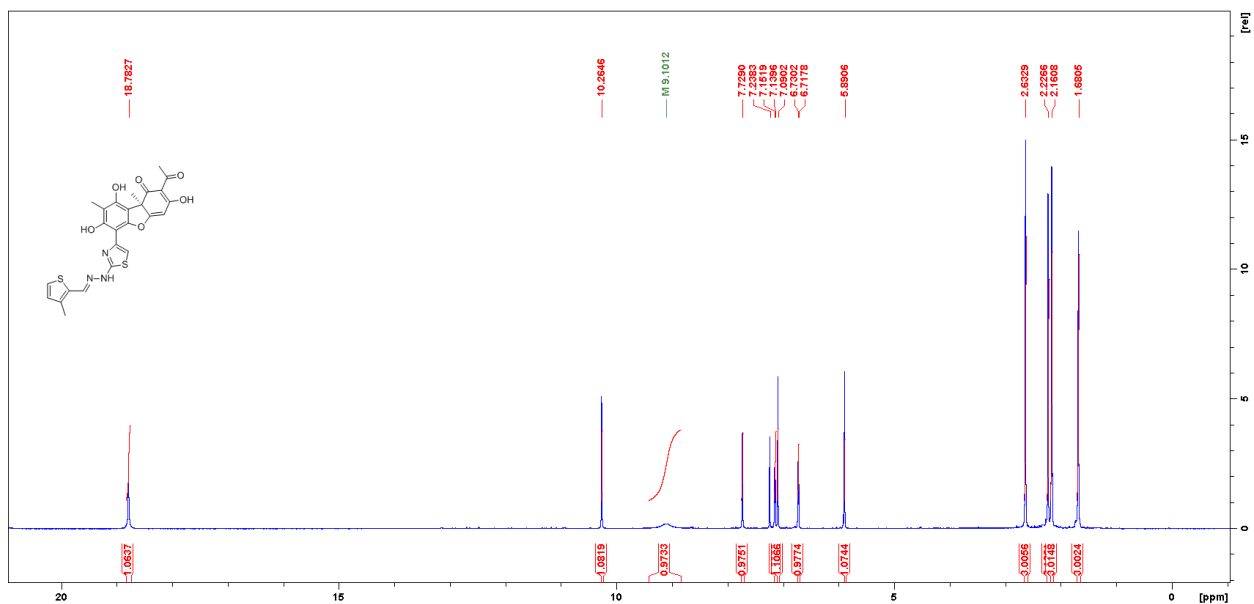

Figure S43: NMR  $^1\text{H}$  spectra of **16i**

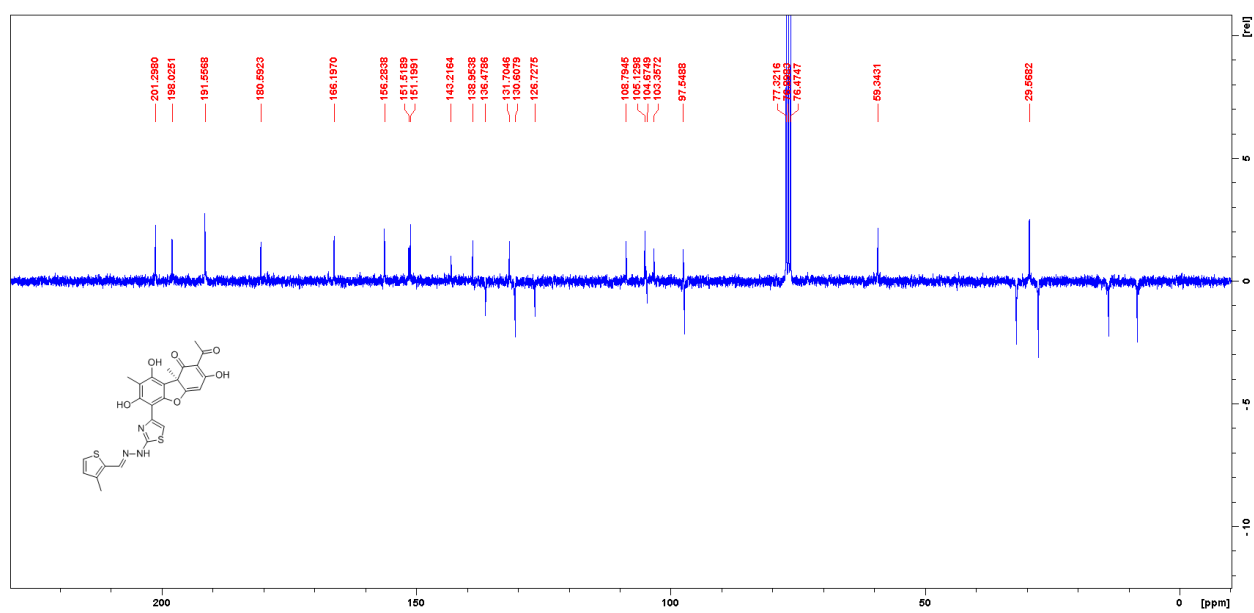

Figure S44: NMR  $^{13}\text{C}$  (J-MOD) spectra of **16i**

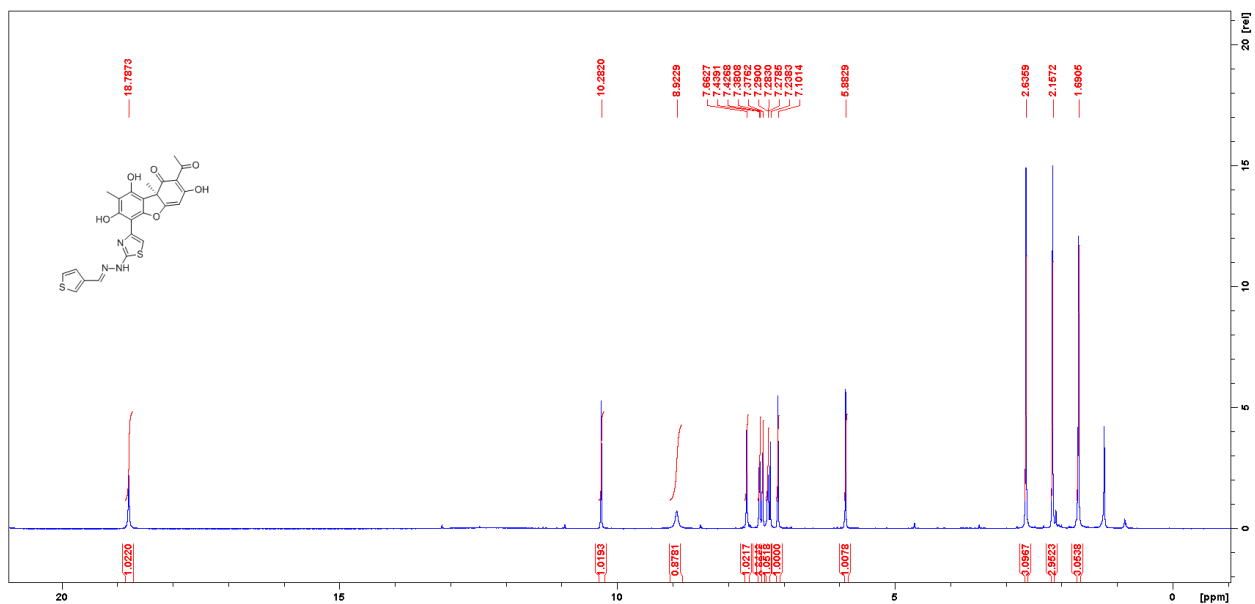

Figure S45: NMR  $^1\text{H}$  spectra of **16j**

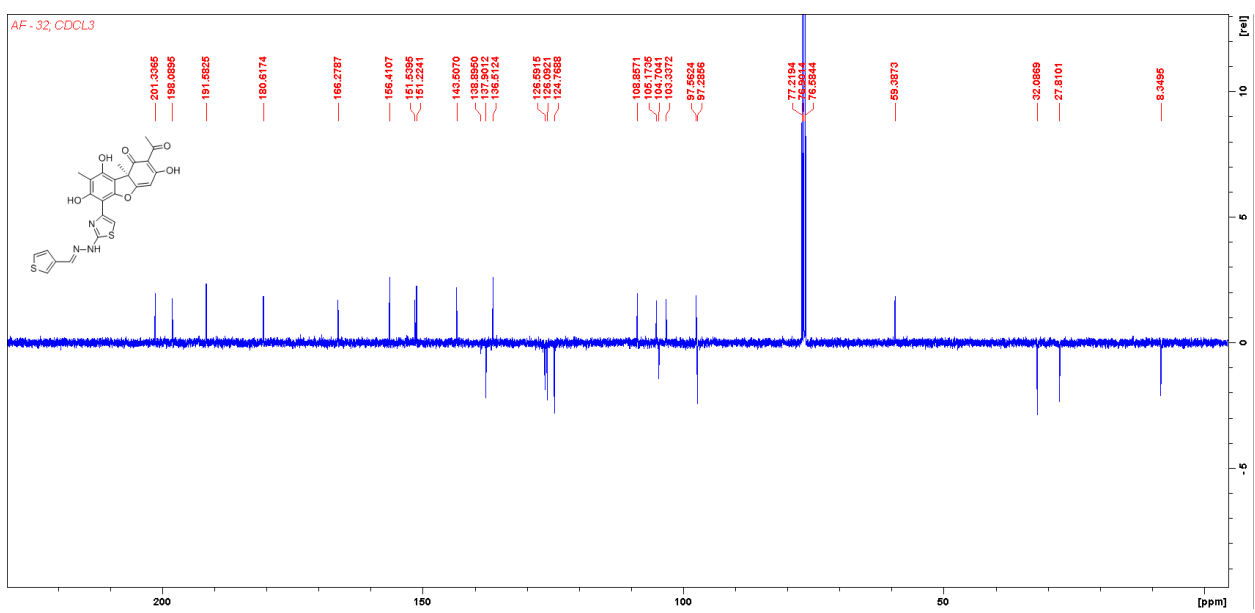

Figure S46: NMR  $^{13}\text{C}$  (J-MOD) spectra of **16j**

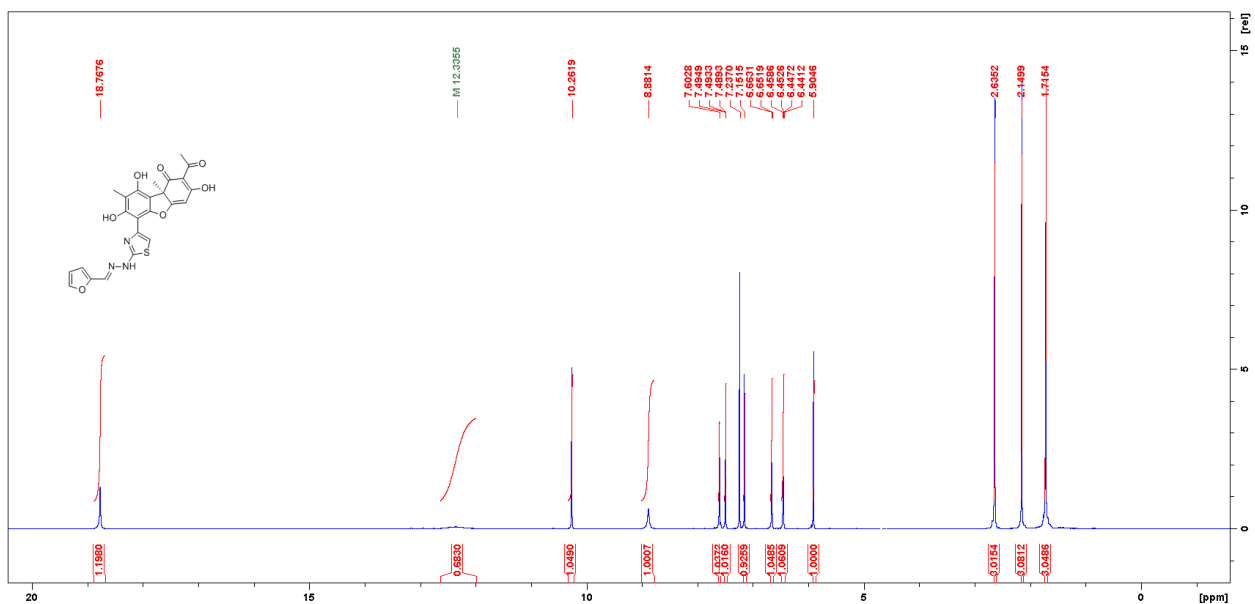

Figure S47: NMR  $^1\text{H}$  spectra of 16k

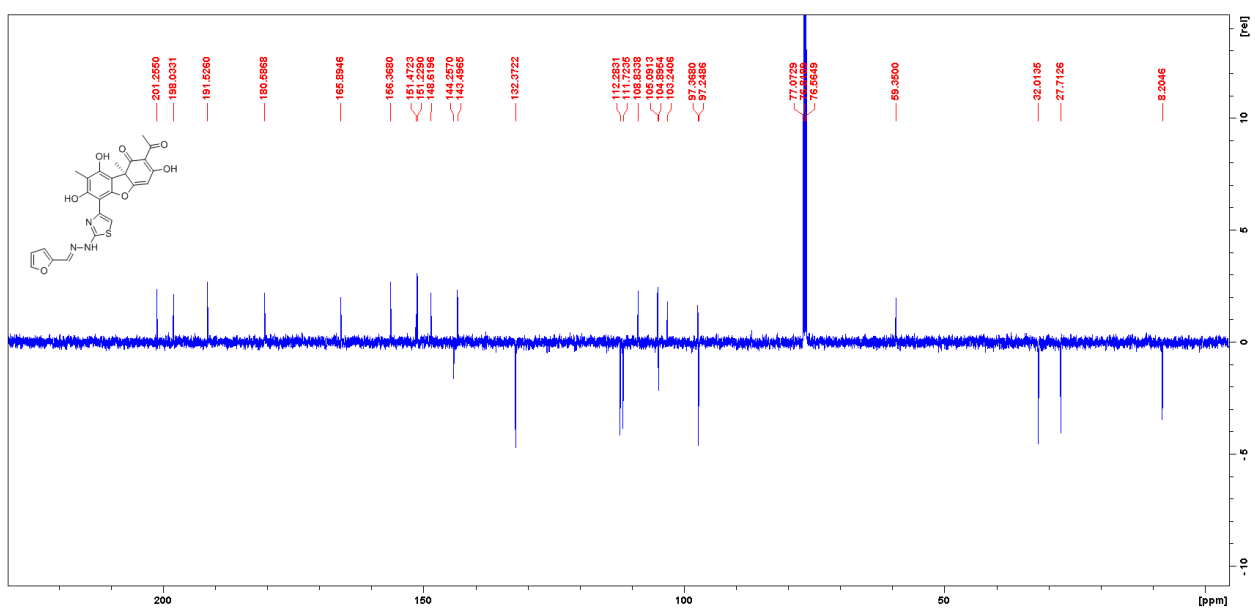

Figure S48: NMR  $^{13}\text{C}$  (J-MOD) spectra of 16k

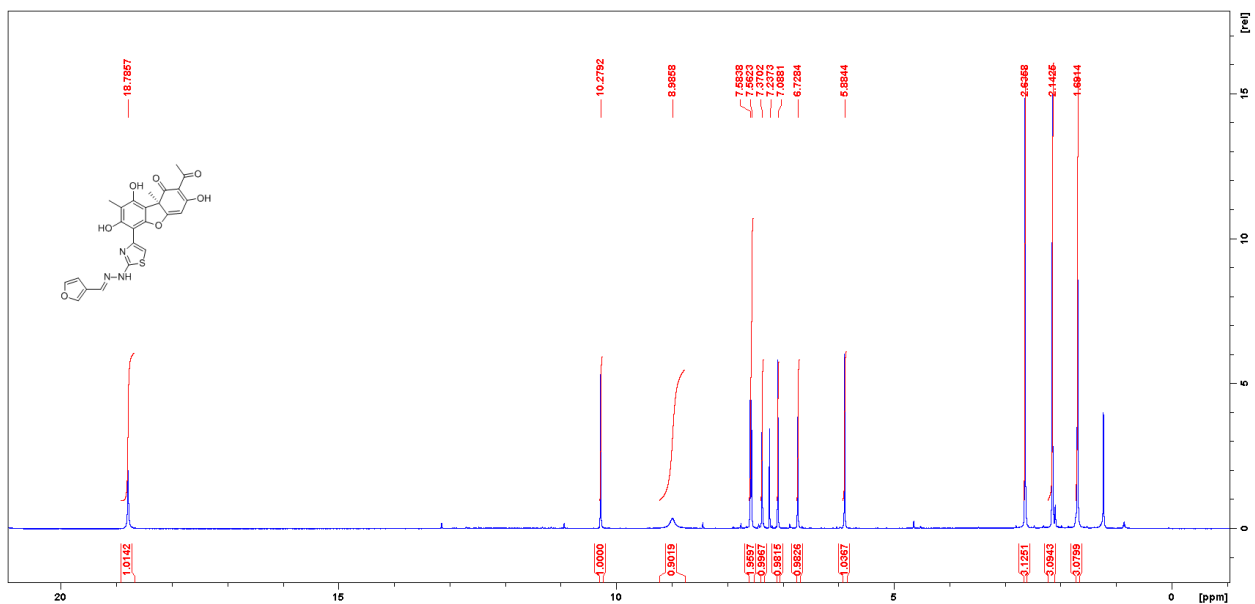

Figure S49: NMR  $^1\text{H}$  spectra of **16l**

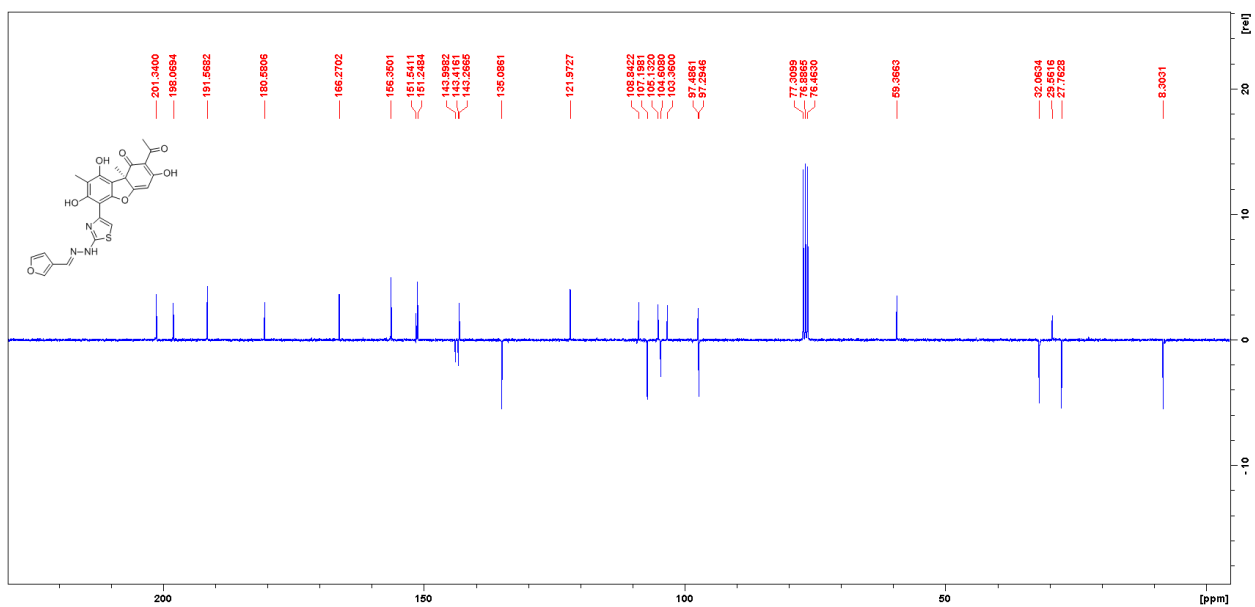

Figure S50: NMR  $^{13}\text{C}$  (J-MOD) spectra of **16l**



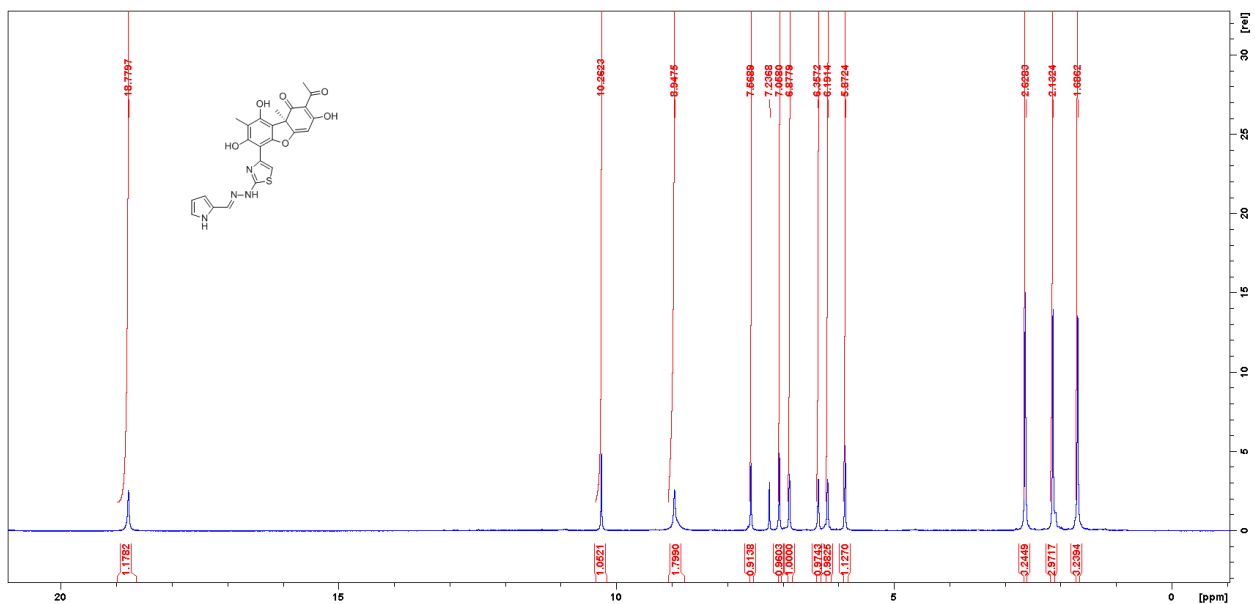

Figure S51: NMR  $^1\text{H}$  spectra of 16m

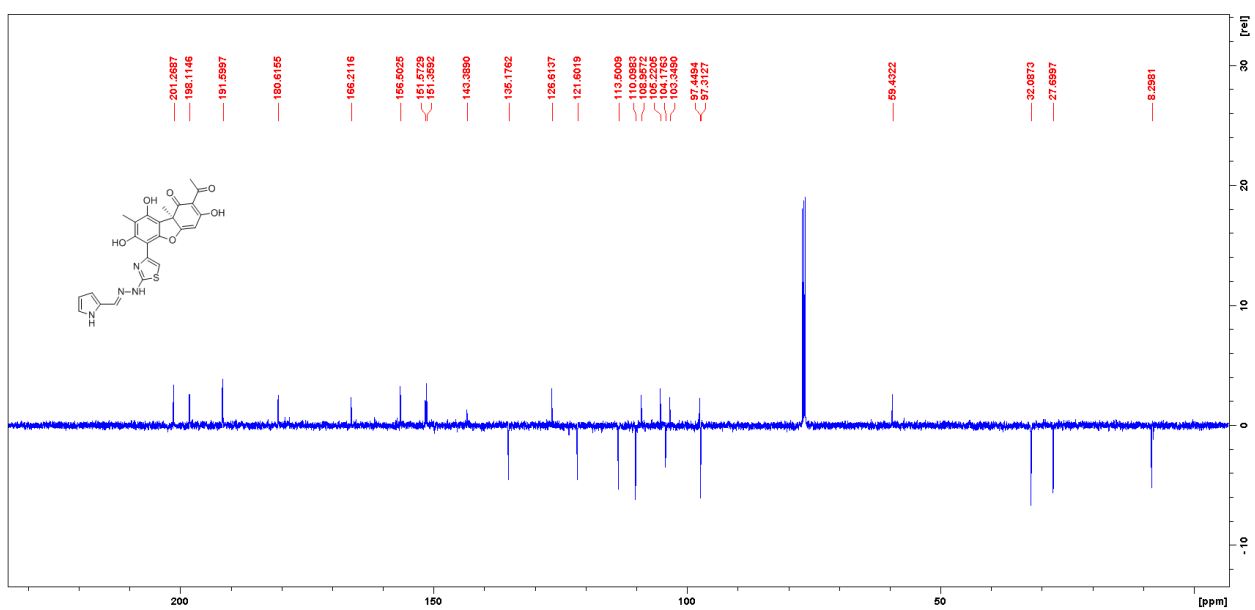

Figure S52: NMR  $^{13}\text{C}$  (J-MOD) spectra of 16m

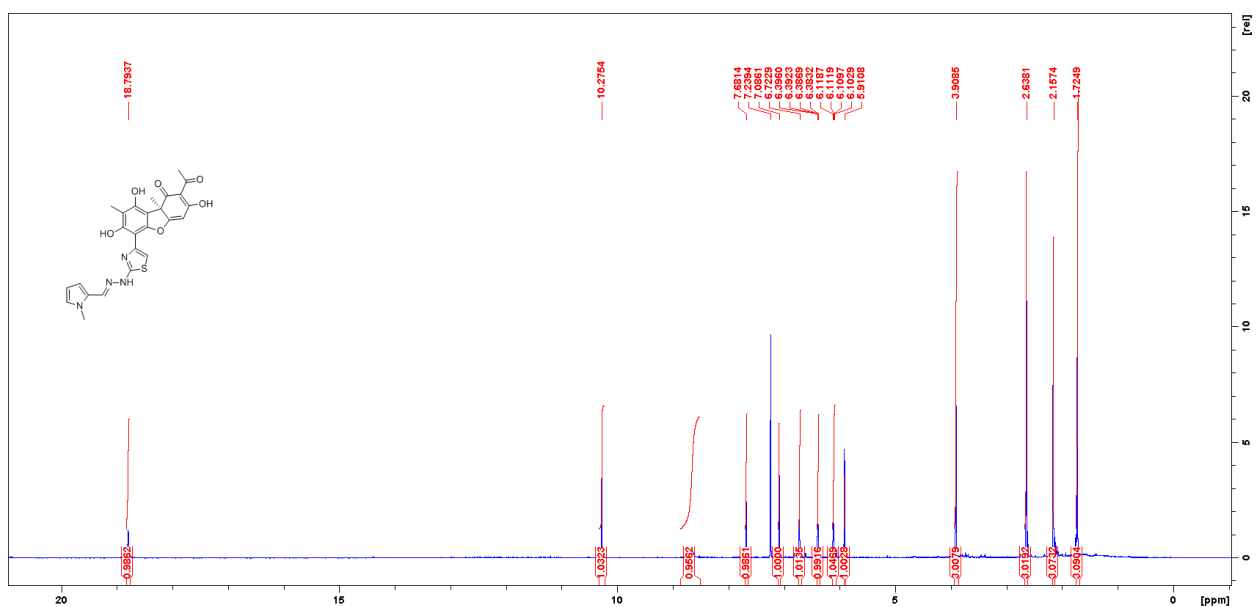

Figure S53: NMR  $^1\text{H}$  spectra of 16n

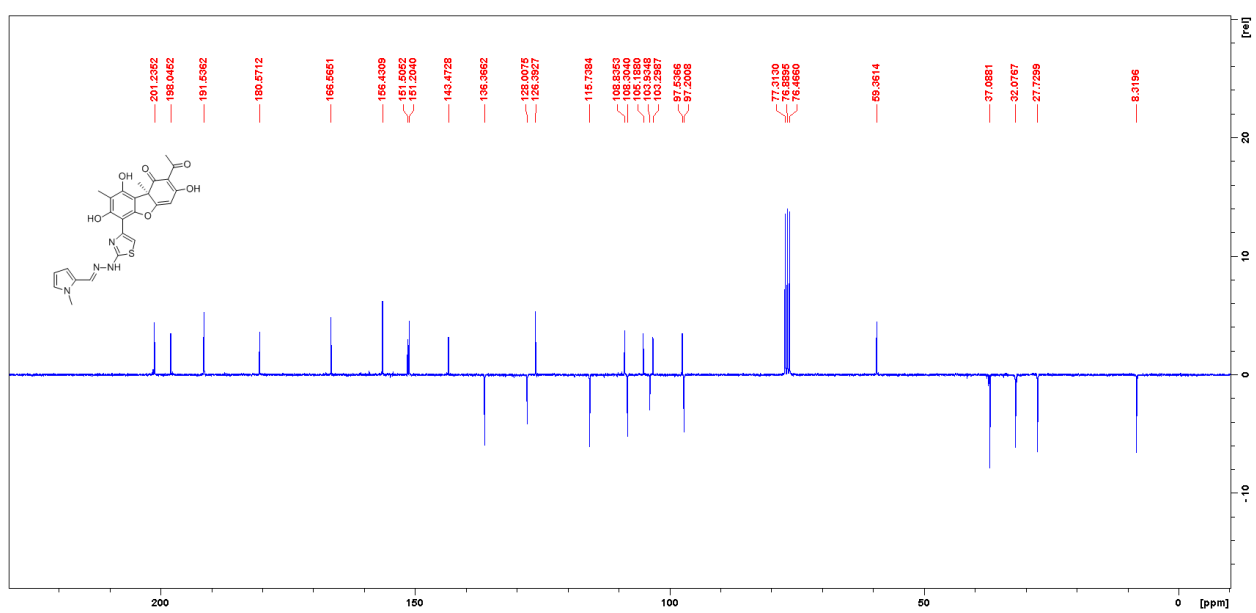

Figure S54: NMR  $^{13}\text{C}$  (J-MOD) spectra of 16n



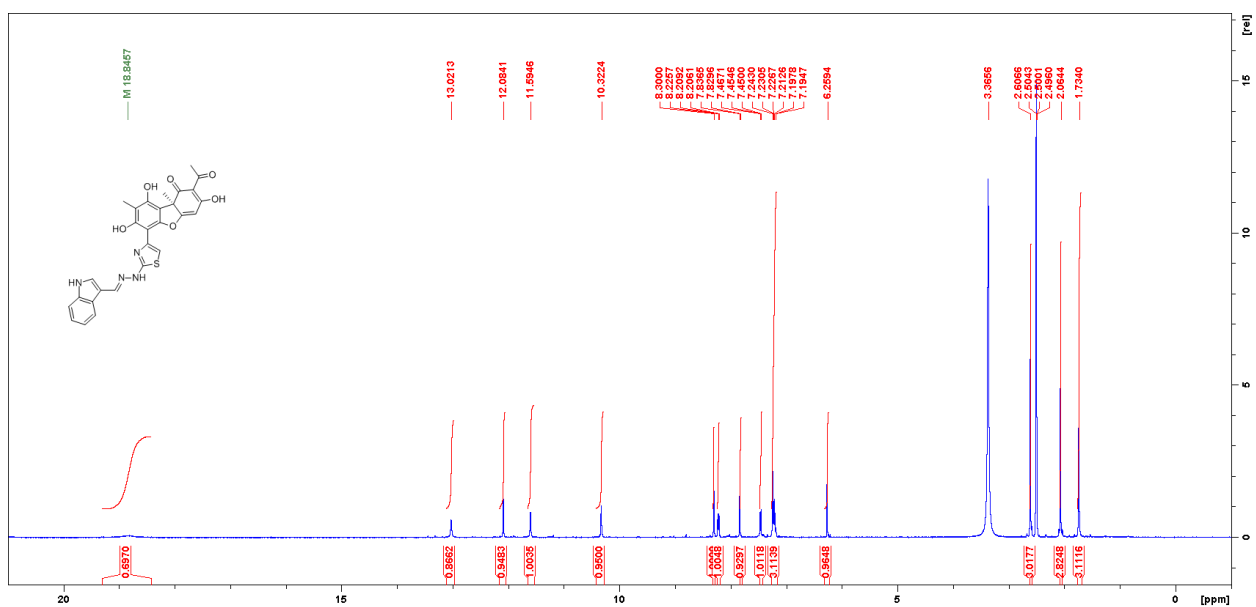

Figure S57: NMR  $^1\text{H}$  spectra of **16p**

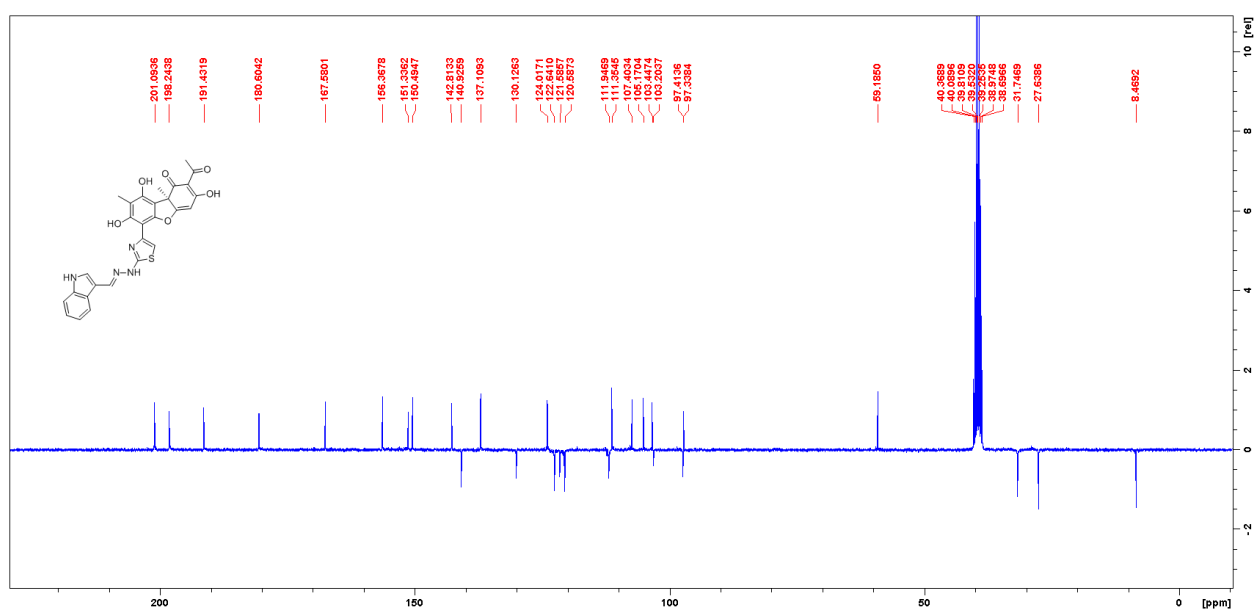

Figure S58: NMR  $^{13}\text{C}$  (J-MOD) spectra of **16p**

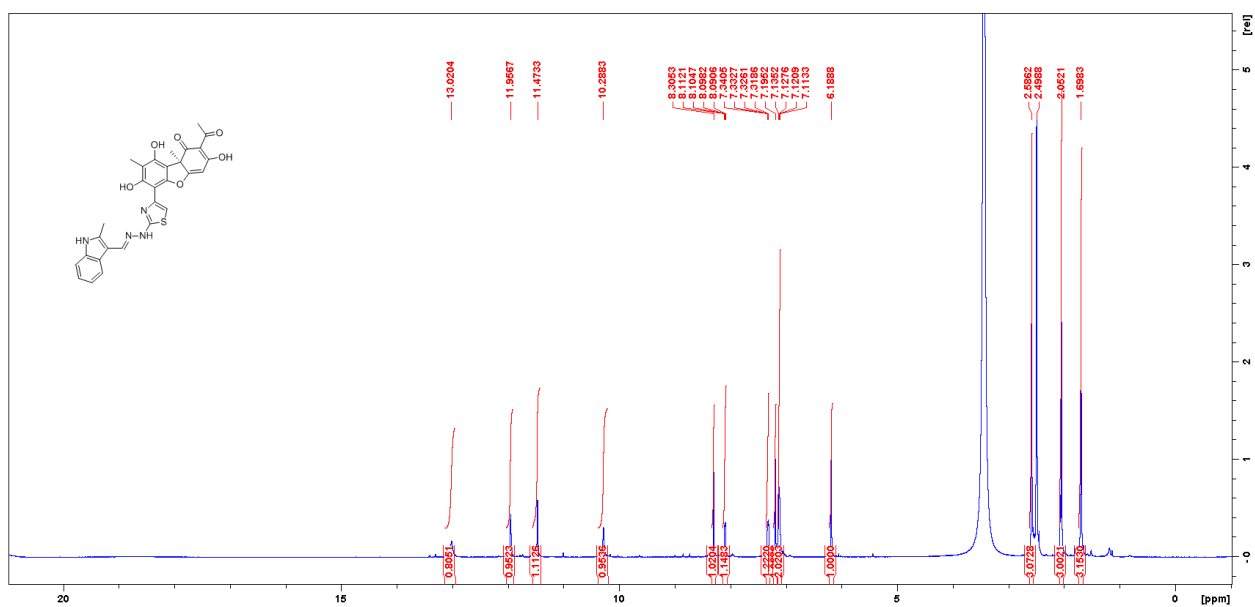

Figure S59: NMR  $^1\text{H}$  spectra of 16q

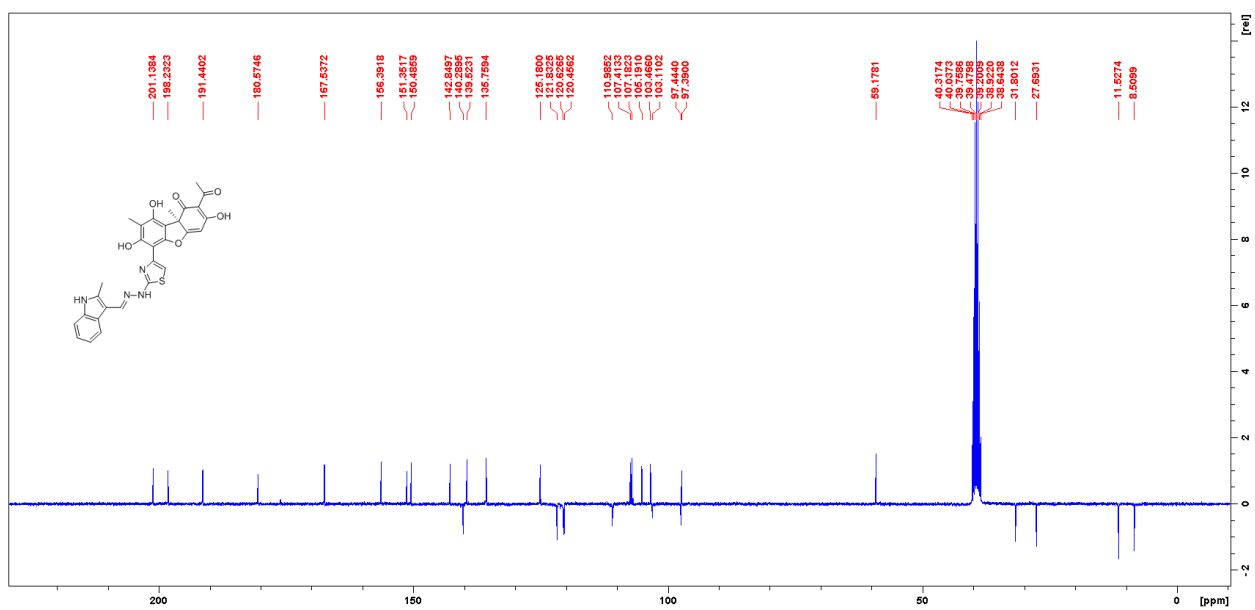

Figure S60: NMR  $^{13}\text{C}$  (J-MOD) spectra of 16q

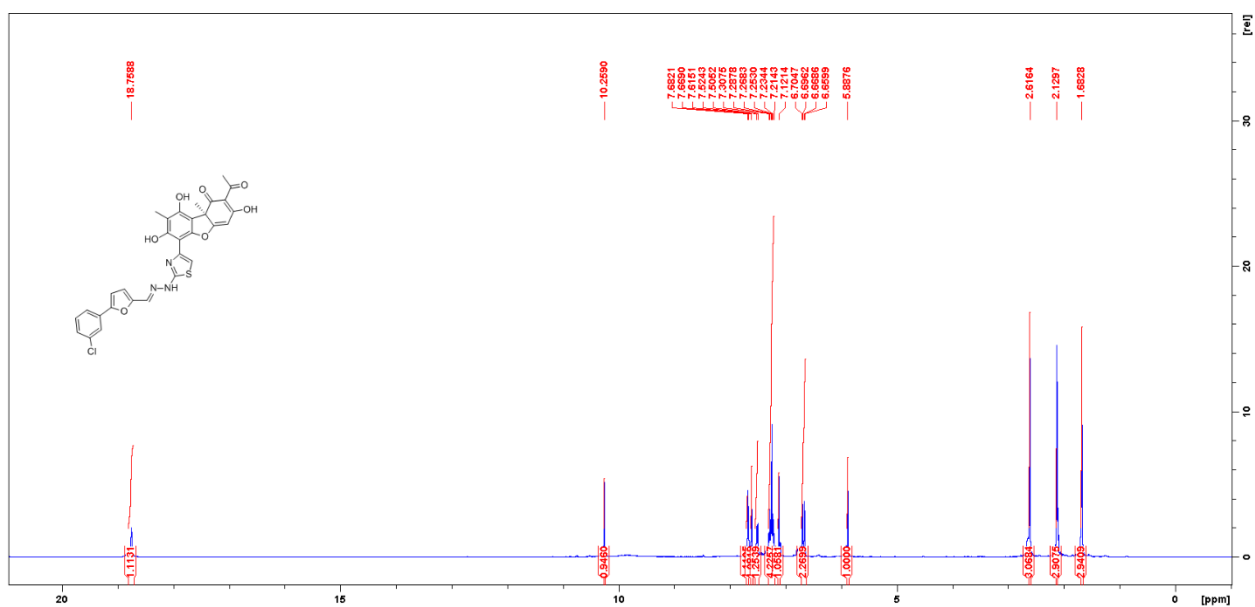

Figure S61: NMR  $^1\text{H}$  spectra of 16r

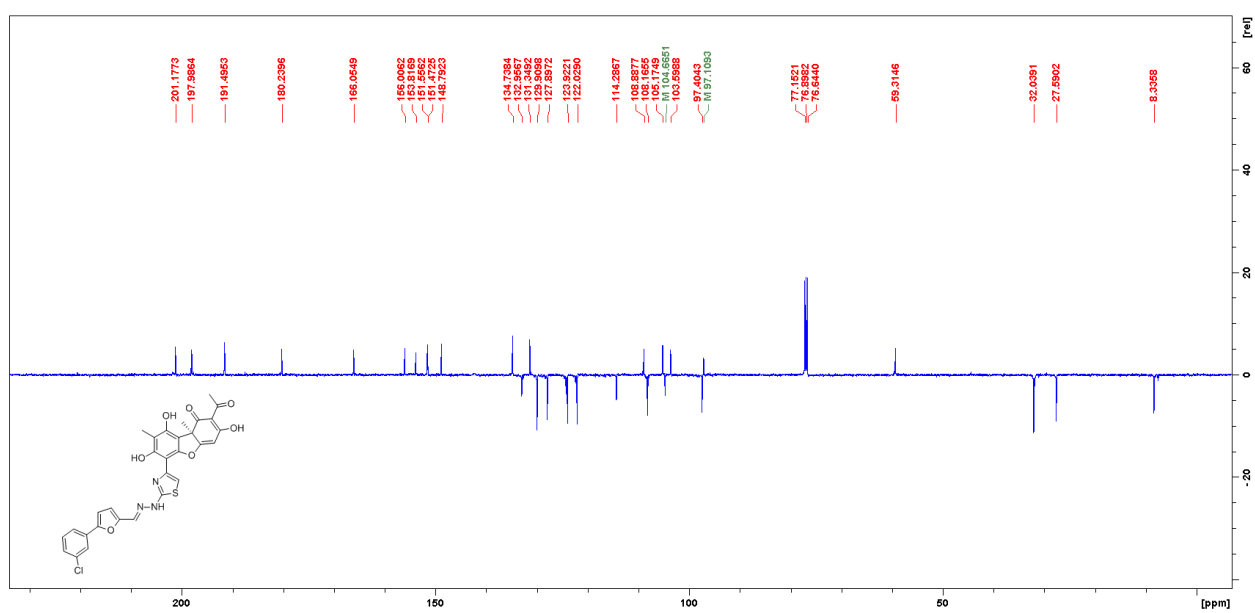

Figure S62: NMR  $^{13}\text{C}$  (J-MOD) spectra of 16r



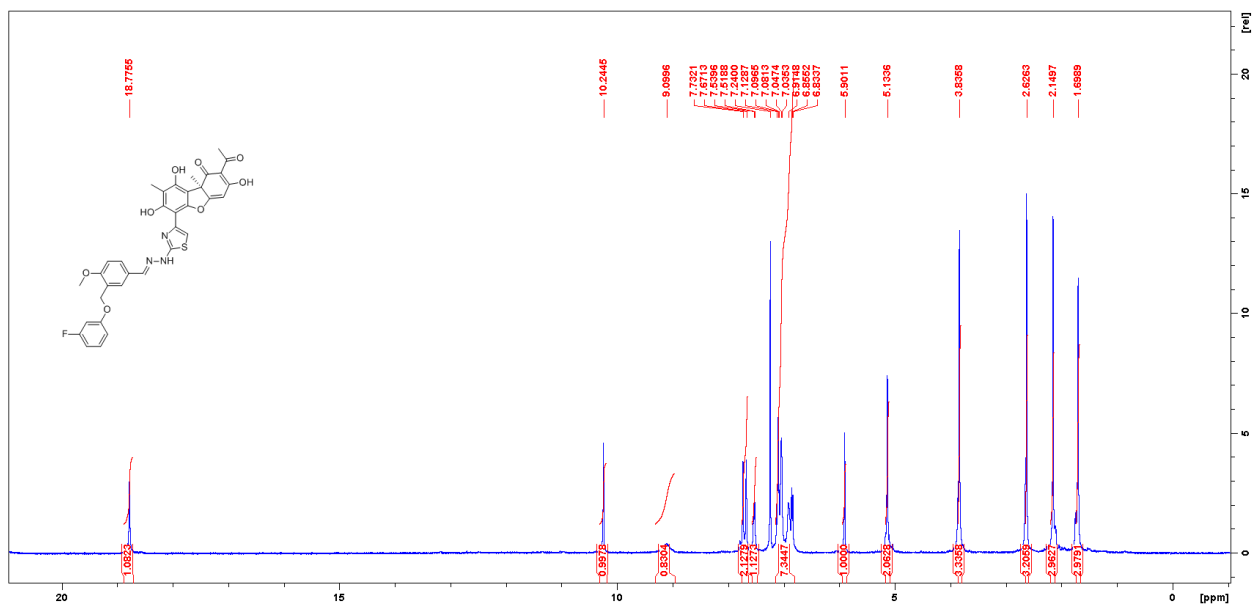

Figure S65: NMR  $^1\text{H}$  spectra of **17b**

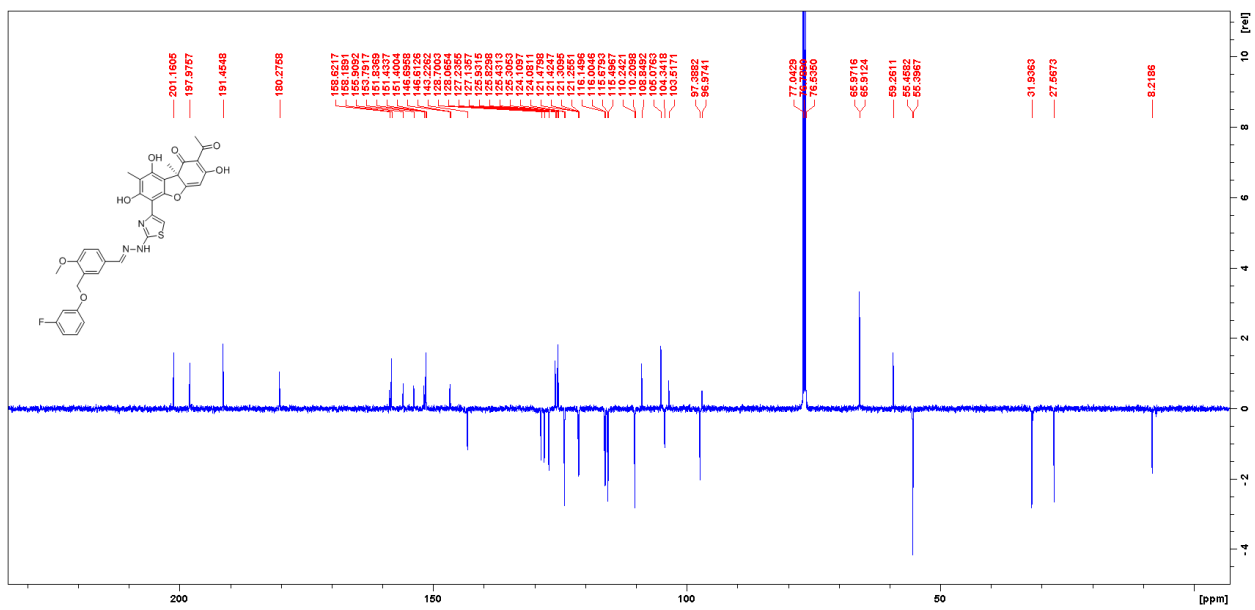

Figure S66: NMR  $^{13}\text{C}$  (J-MOD) spectra of **17b**



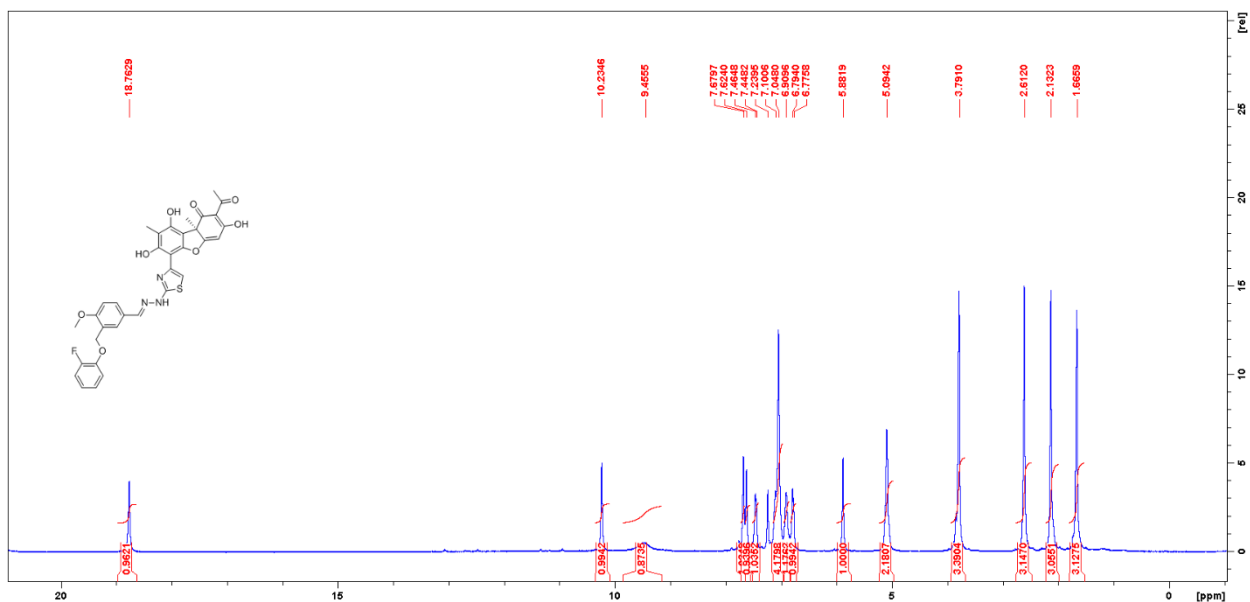

Figure S67: NMR  $^1\text{H}$  spectra of 17c

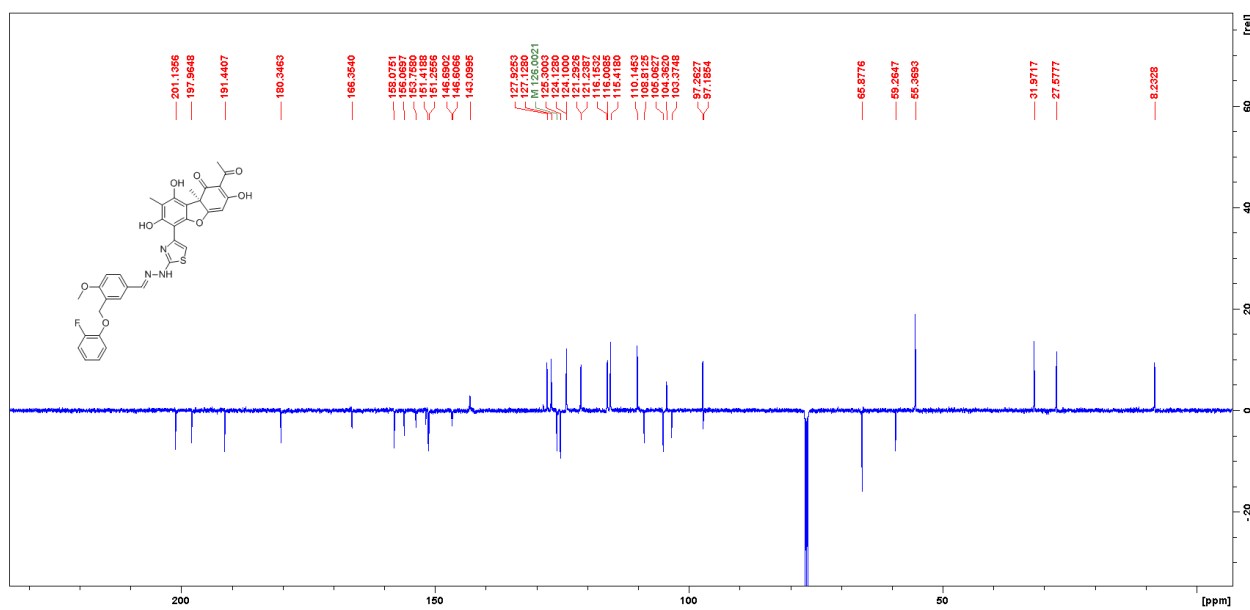

Figure S68: NMR  $^{13}\text{C}$  (J-MOD) spectra of 17c

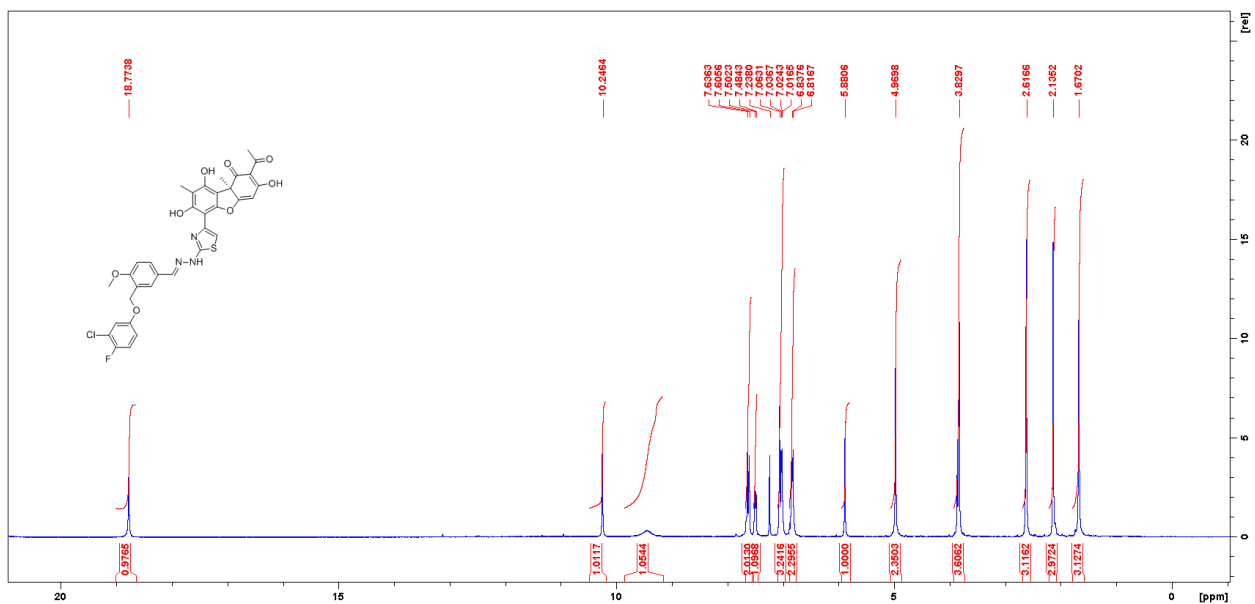

Figure S69: NMR  $^1\text{H}$  spectra of 17d

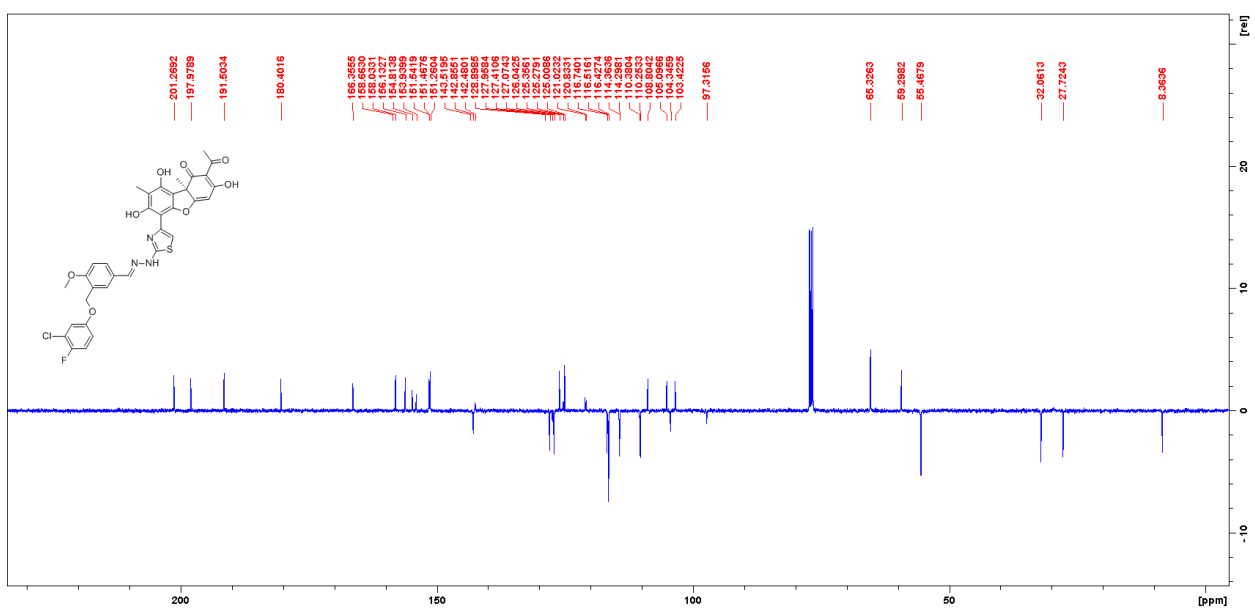

Figure S70: NMR  $^{13}\text{C}$  (J-MOD) spectra of 17d

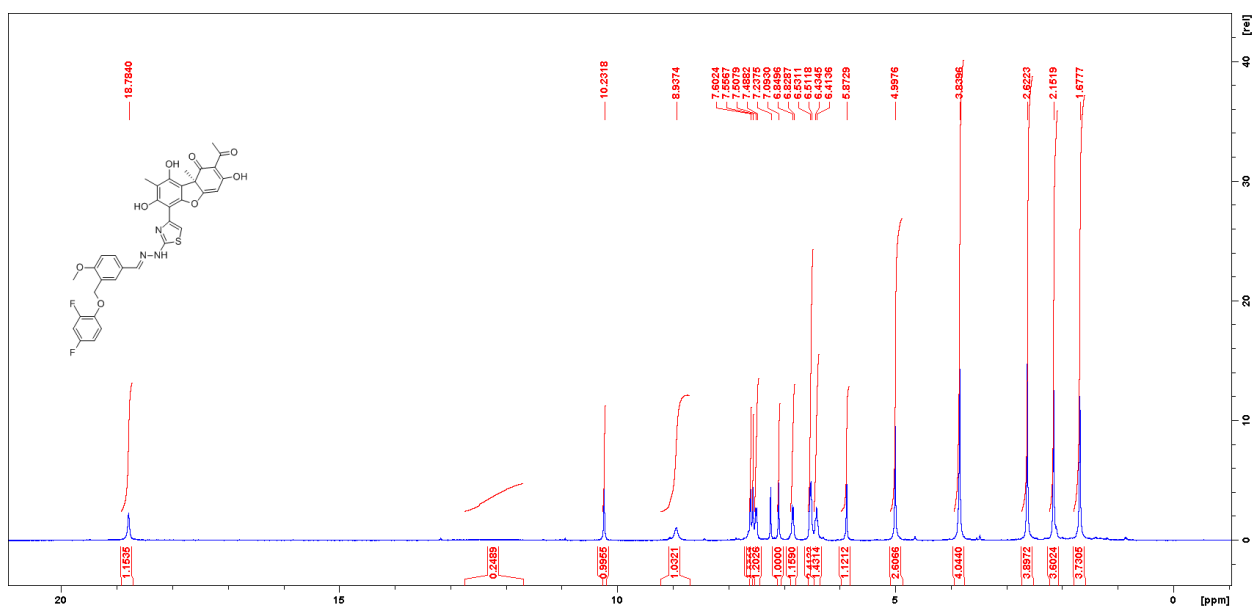

Figure S71: NMR  $^1\text{H}$  spectra of **17e**

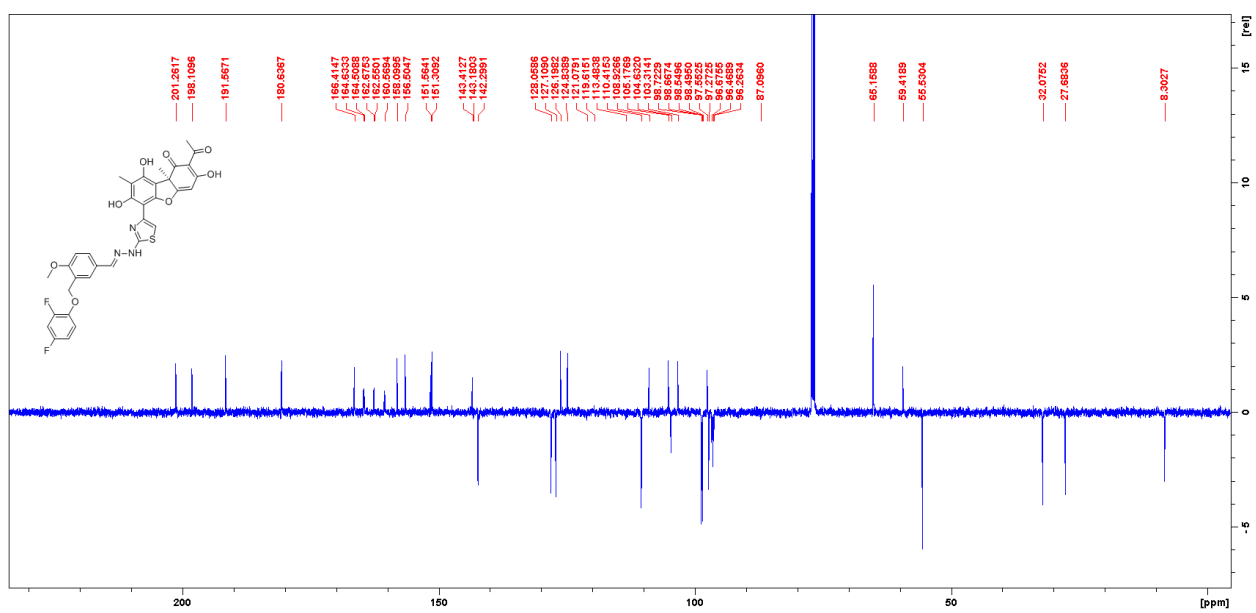

Figure S72: NMR  $^{13}\text{C}$  (J-MOD) spectra of **17e**

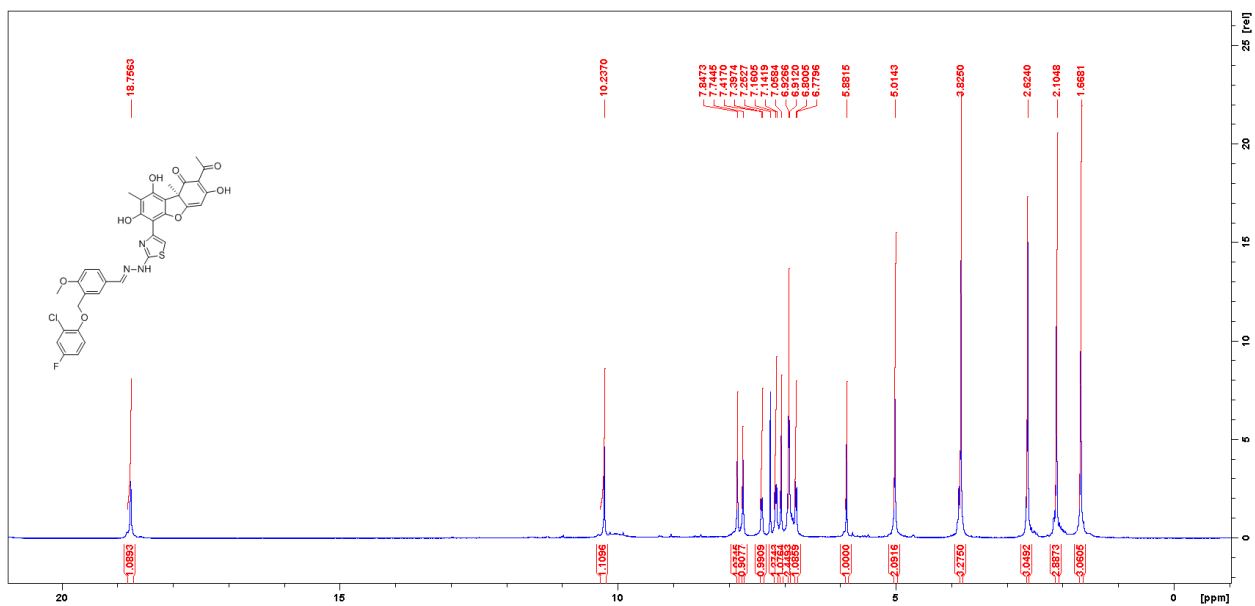

Figure S73: NMR  $^1\text{H}$  spectra of 17f

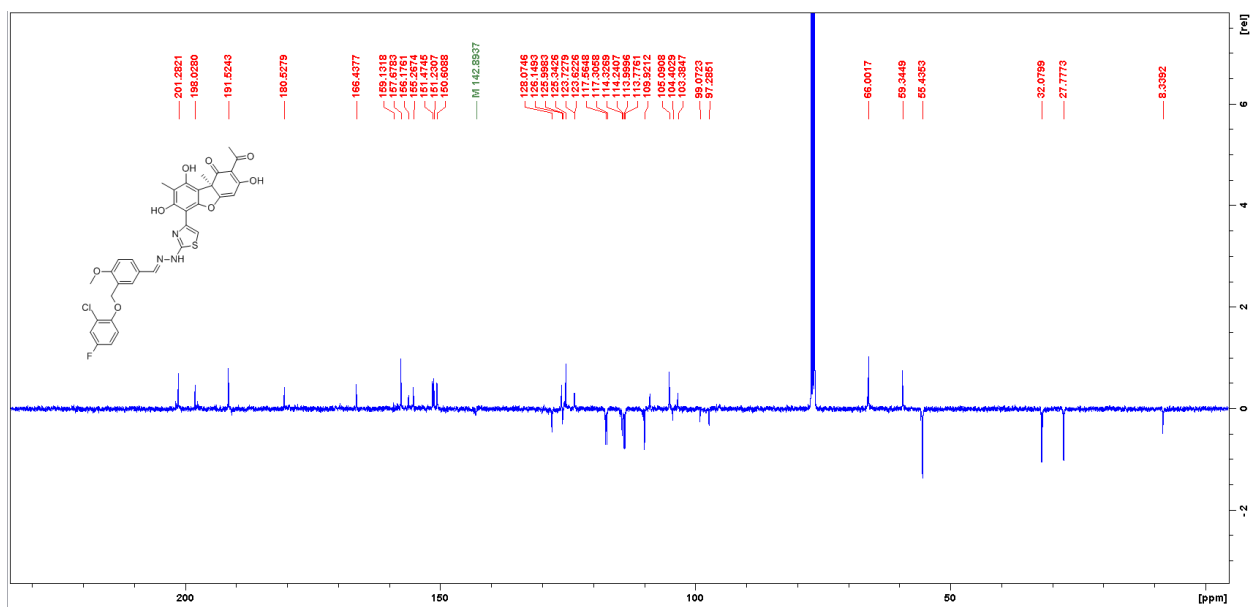

Figure S74: NMR  $^{13}\text{C}$  (J-MOD) spectra of 17f



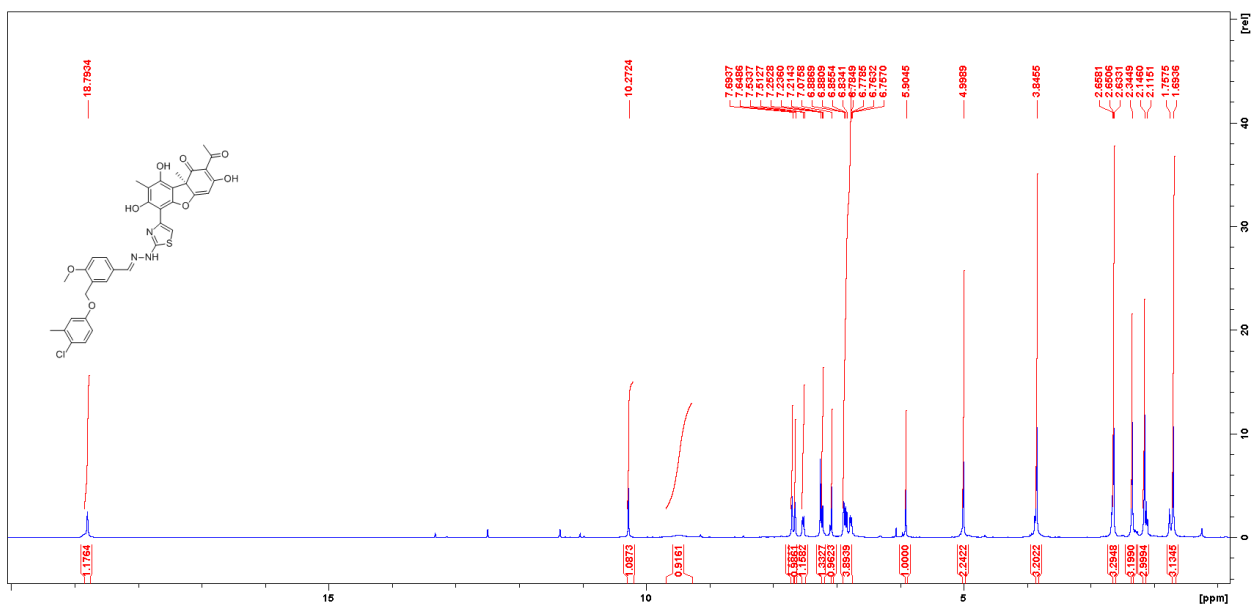

Figure S77: NMR  $^1\text{H}$  spectra of 17h

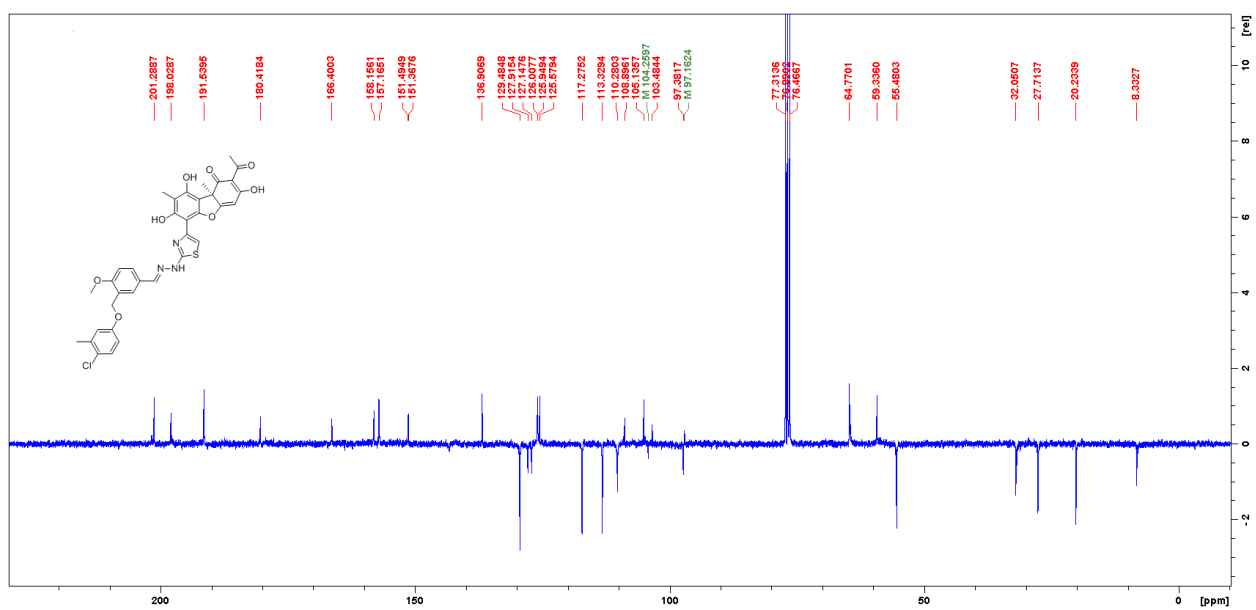

Figure S78: NMR  $^{13}\text{C}$  (J-MOD) spectra of 17h

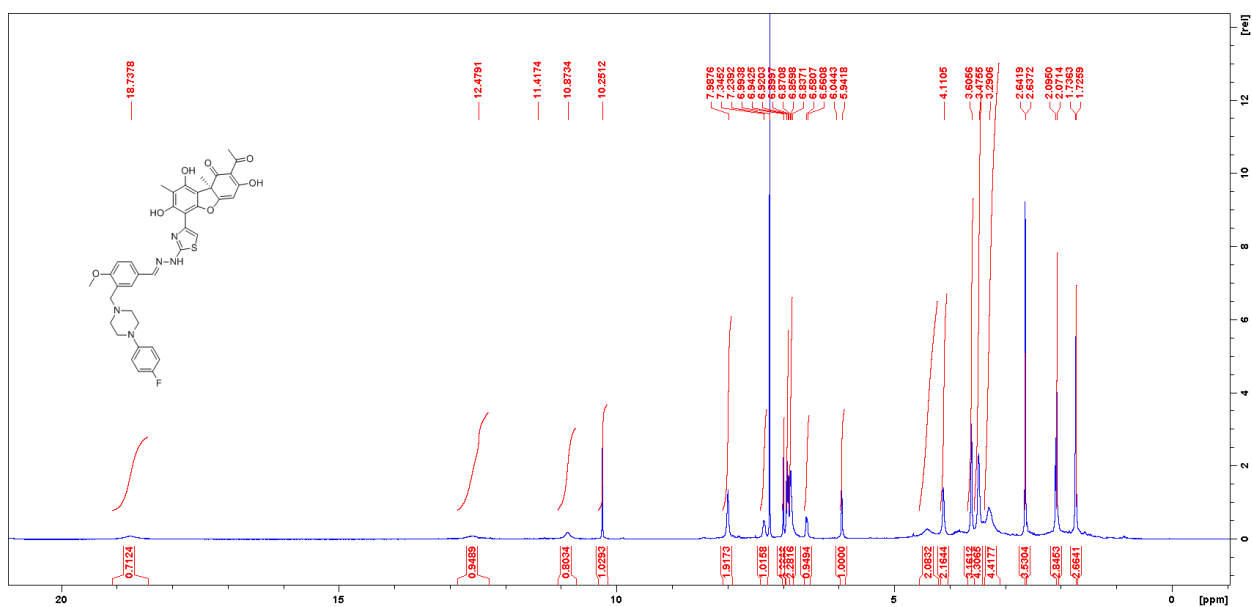

Figure S79: NMR <sup>1</sup>H spectra of 17i

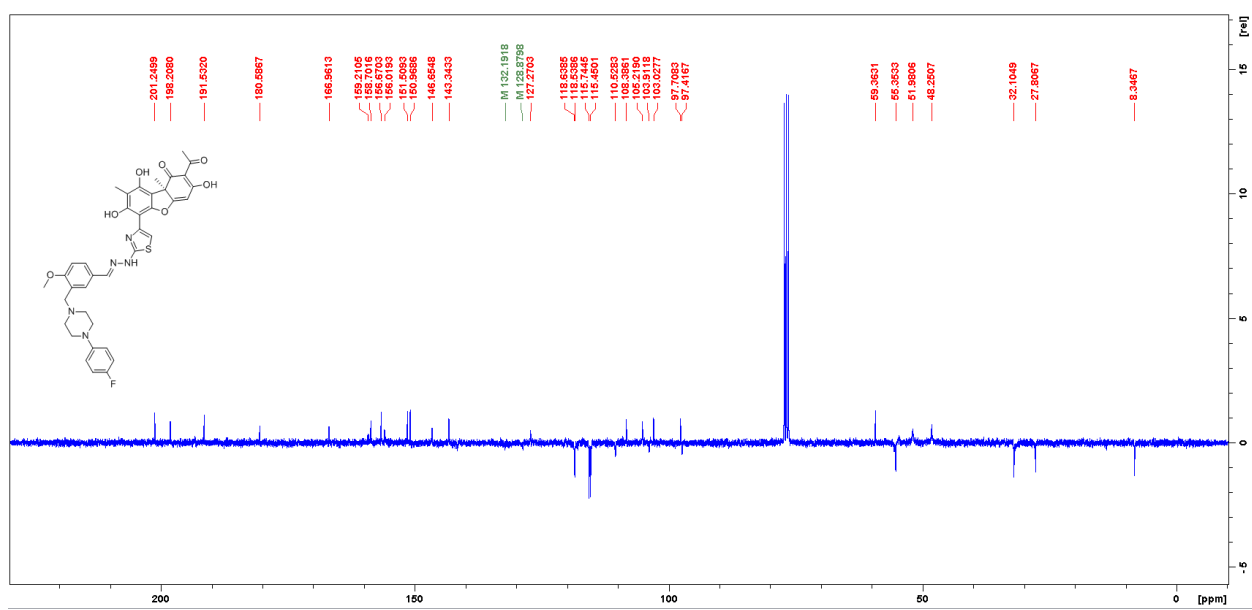

Figure S80: NMR <sup>13</sup>C (J-MOD) spectra of 17i

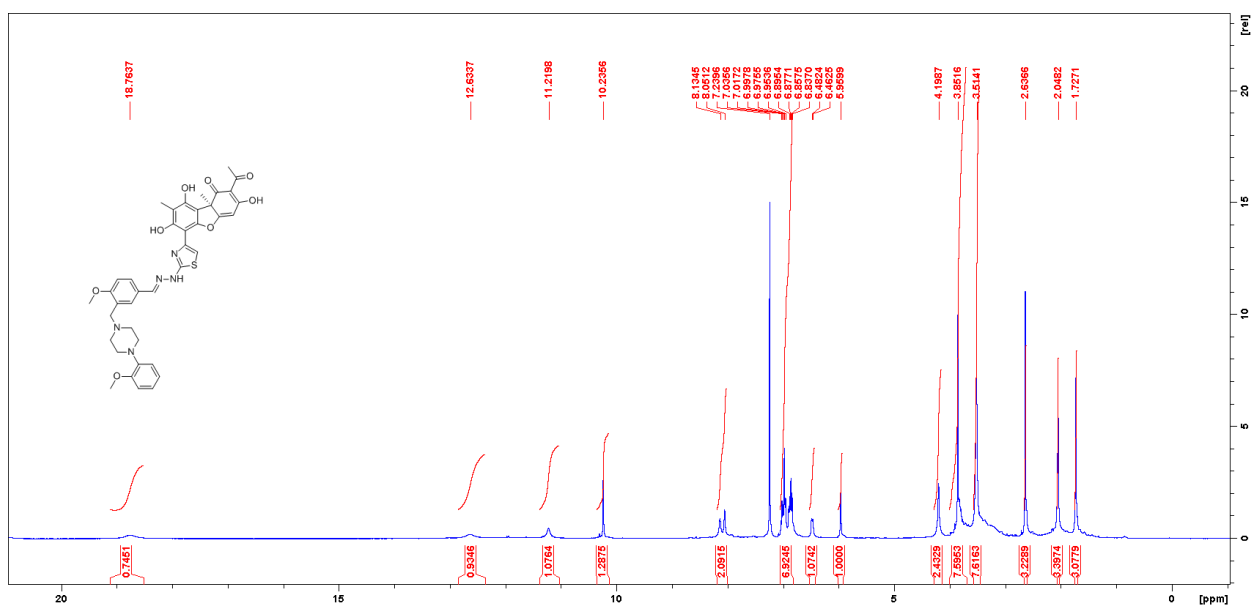

Figure S81: NMR  $^1\text{H}$  spectra of **17j**

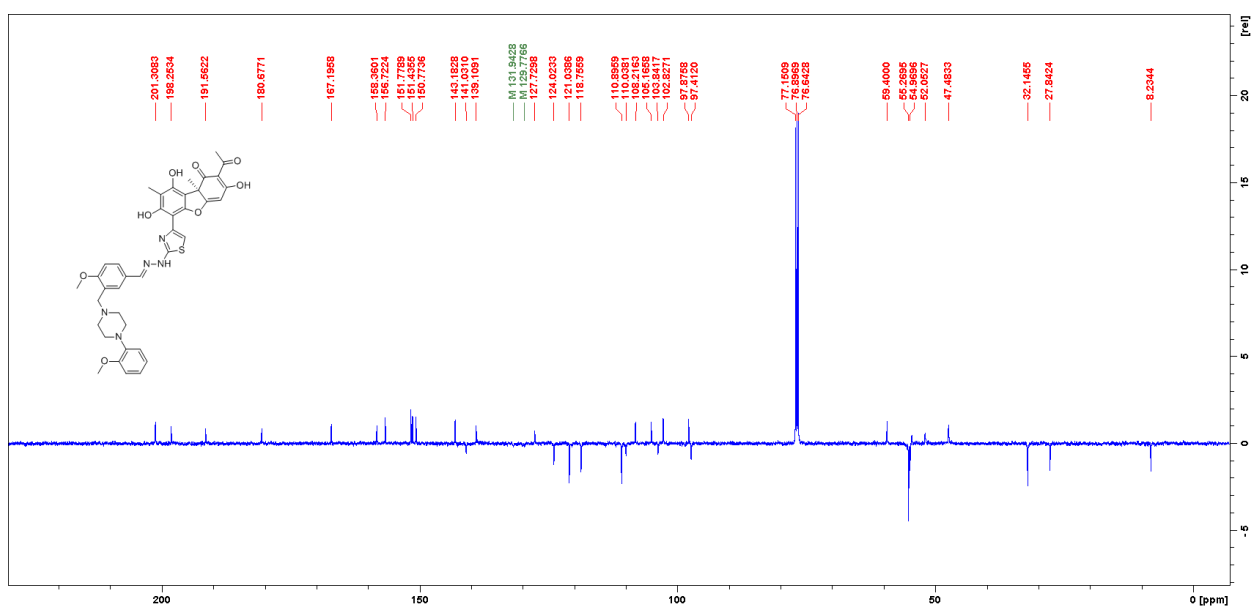

Figure S82: NMR  $^{13}\text{C}$  (J-MOD) spectra of **17j**



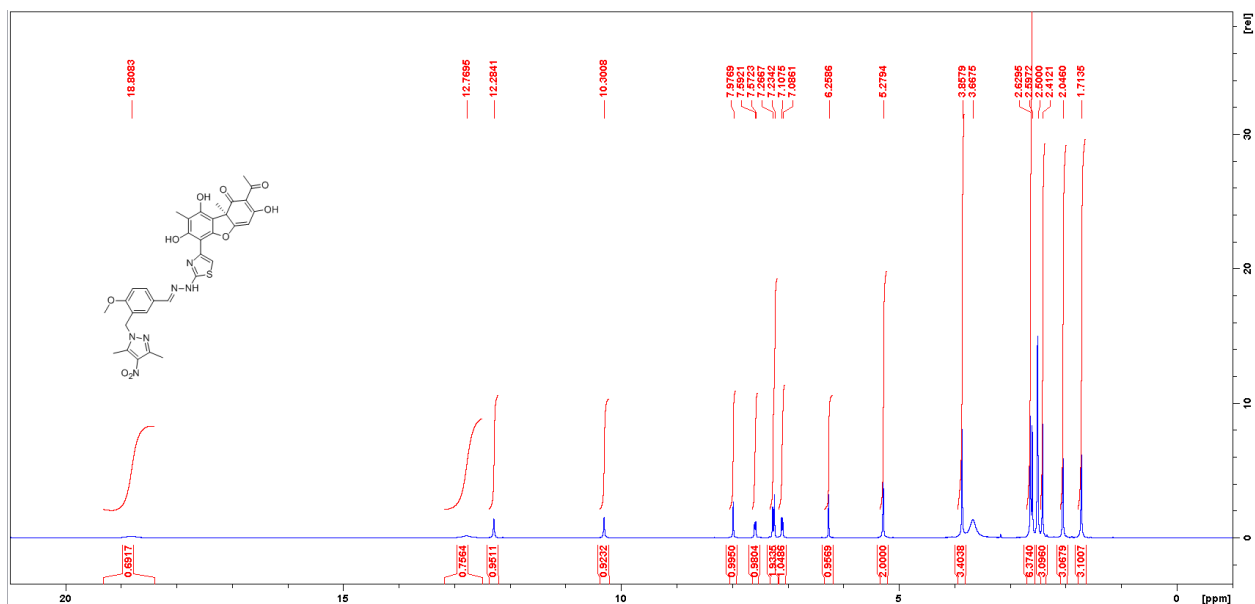

Figure S83: NMR  $^1\text{H}$  spectra of **17k**

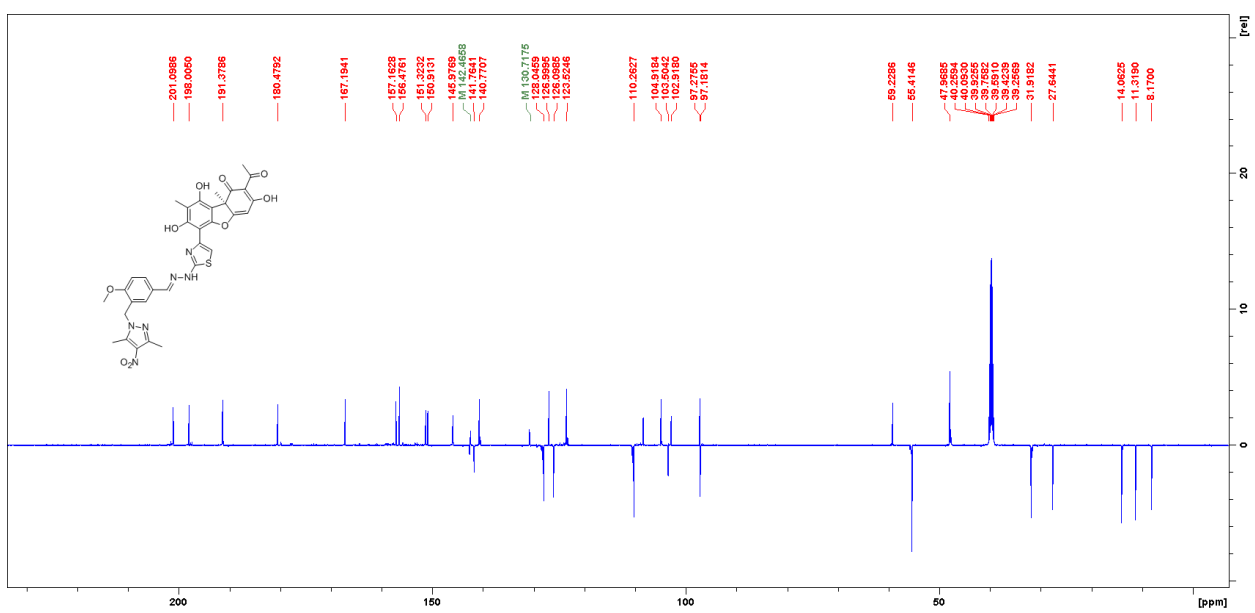

Figure S84: NMR  $^{13}\text{C}$  (J-MOD) spectra of **17k**

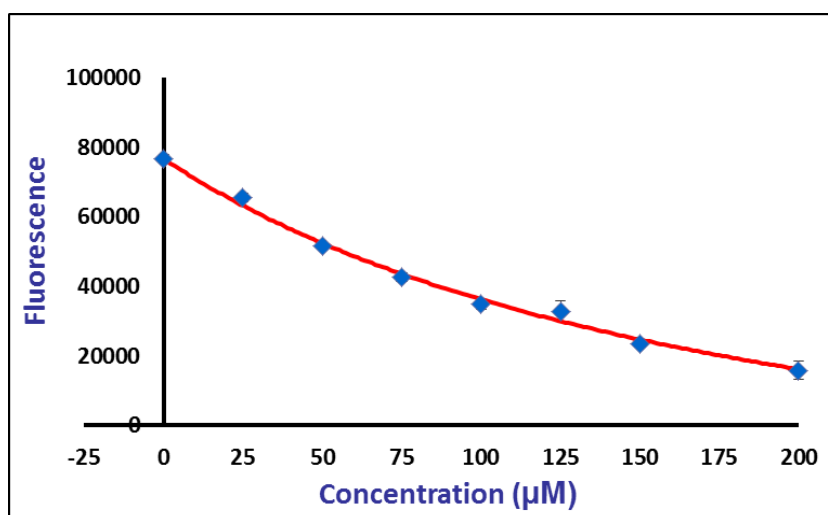

**Figure S85:** Changes in intrinsic fluorescence intensity of Tdp1 (10  $\mu\text{M}$ ) upon the addition of compound 16a(+) (25  $\mu\text{M}$ , 50  $\mu\text{M}$ , 75  $\mu\text{M}$ , 100  $\mu\text{M}$ , 125  $\mu\text{M}$ , 150  $\mu\text{M}$  and 200  $\mu\text{M}$ ). Buffer was 20 mM Tris and 250 mM NaCl (pH 8). Excitation wavelength was 280 nm and intrinsic fluorescence was measured at 350 nm. The  $K_D$  was  $139 \pm 32 \mu\text{M}$ . Experiment were conducted in triplicate.

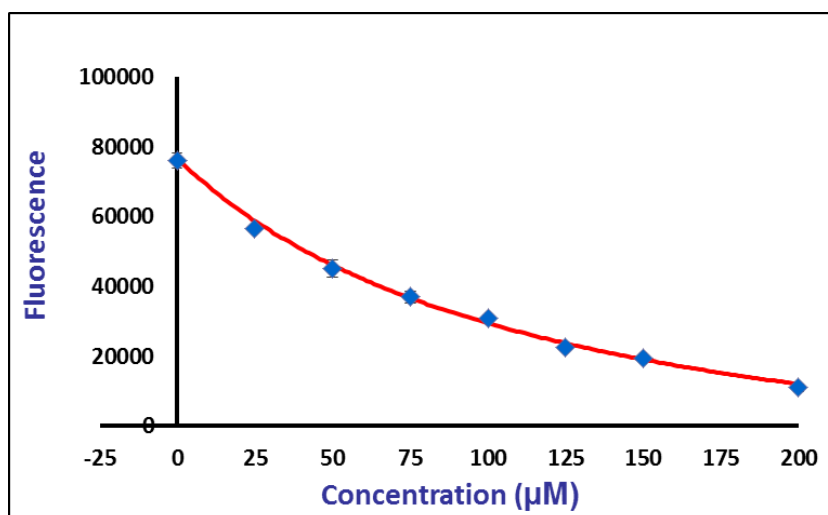

**Figure S86:** Changes in intrinsic fluorescence intensity of Tdp1 (10  $\mu\text{M}$ ) upon the addition of compound 16b(+) (25  $\mu\text{M}$ , 50  $\mu\text{M}$ , 75  $\mu\text{M}$ , 100  $\mu\text{M}$ , 125  $\mu\text{M}$ , 150  $\mu\text{M}$  and 200  $\mu\text{M}$ ). Buffer was 20 mM Tris and 250 mM NaCl (pH 8). Excitation wavelength was 280 nm and intrinsic fluorescence was measured at 350 nm. The  $K_D$  was  $77 \pm 24 \mu\text{M}$ . Experiment were conducted in triplicate.

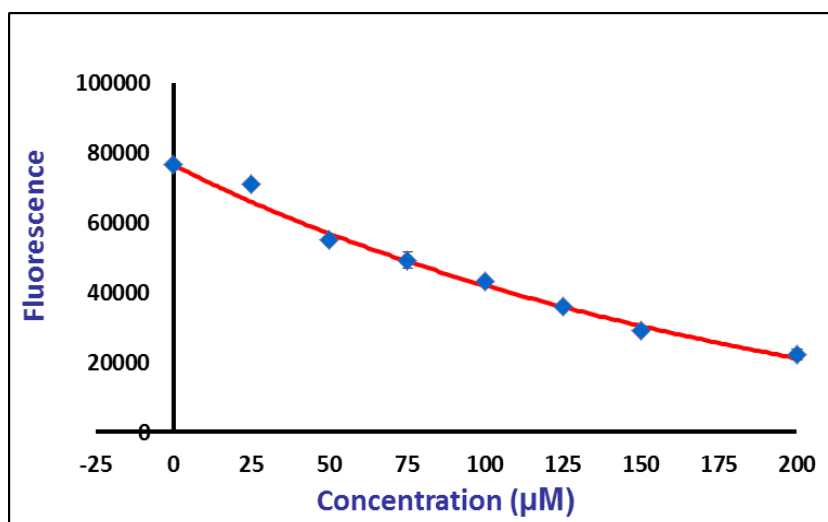

**Figure S87:** Changes in intrinsic fluorescence intensity of Tdp1 (10  $\mu\text{M}$ ) upon the addition of compound 16c(-) (25  $\mu\text{M}$ , 50  $\mu\text{M}$ , 75  $\mu\text{M}$ , 100  $\mu\text{M}$ , 125  $\mu\text{M}$ , 150  $\mu\text{M}$  and 200  $\mu\text{M}$ ). Buffer was 20 mM Tris and 250 mM NaCl (pH 8). Excitation wavelength was 280 nm and intrinsic fluorescence was measured at 350 nm. The  $K_D$  was  $262 \pm 25 \mu\text{M}$ . Experiment were conducted in triplicate.

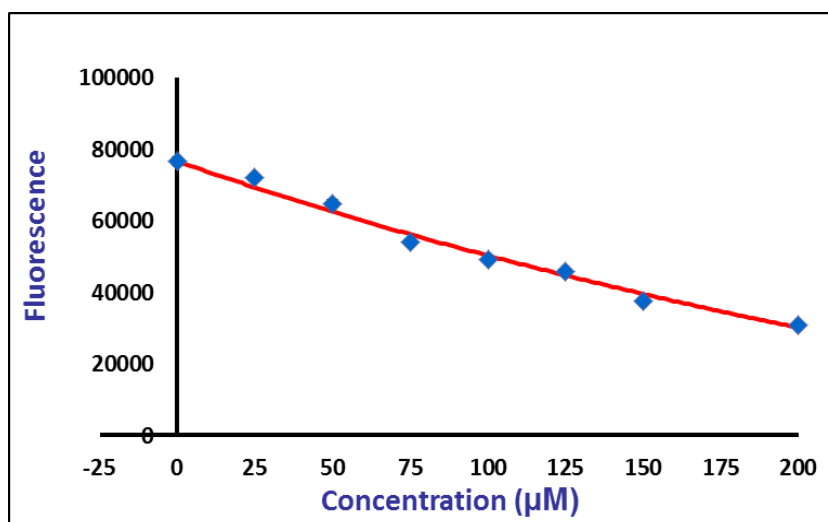

**Figure S88:** Changes in intrinsic fluorescence intensity of Tdp1 (10  $\mu\text{M}$ ) upon the addition of compound 16d(+) (25  $\mu\text{M}$ , 50  $\mu\text{M}$ , 75  $\mu\text{M}$ , 100  $\mu\text{M}$ , 125  $\mu\text{M}$ , 150  $\mu\text{M}$  and 200  $\mu\text{M}$ ). Buffer was 20 mM Tris and 250 mM NaCl (pH 8). Excitation wavelength was 280 nm and intrinsic fluorescence was measured at 350 nm. The  $K_D$  was  $597 \pm 98 \mu\text{M}$ . Experiment were conducted in triplicate.

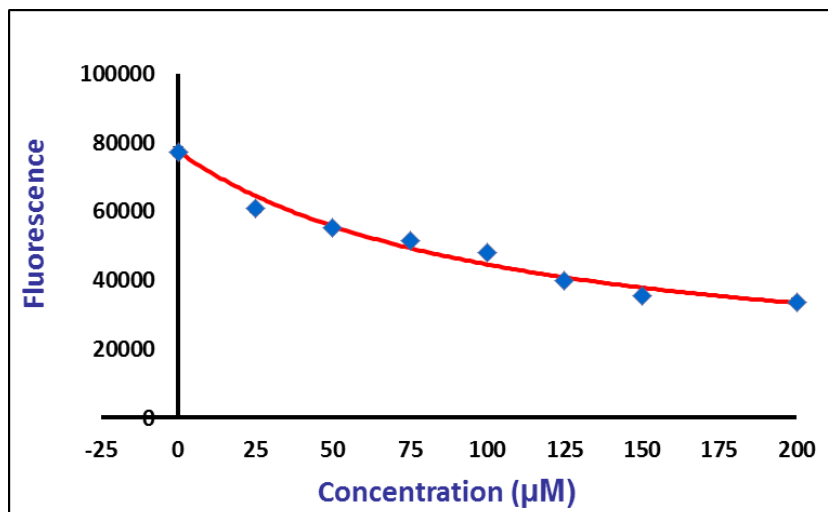

**Figure S 89:** Changes in intrinsic fluorescence intensity of Tdp1 (10  $\mu\text{M}$ ) upon the addition of compound 16f(+) (25  $\mu\text{M}$ , 50  $\mu\text{M}$ , 75  $\mu\text{M}$ , 100  $\mu\text{M}$ , 125  $\mu\text{M}$ , 150  $\mu\text{M}$  and 200  $\mu\text{M}$ ). Buffer was 20 mM Tris and 250 mM NaCl (pH 8). Excitation wavelength was 280 nm and intrinsic fluorescence was measured at 350 nm. The  $K_D$  was  $95 \pm 11 \mu\text{M}$ . Experiment were conducted in triplicate.

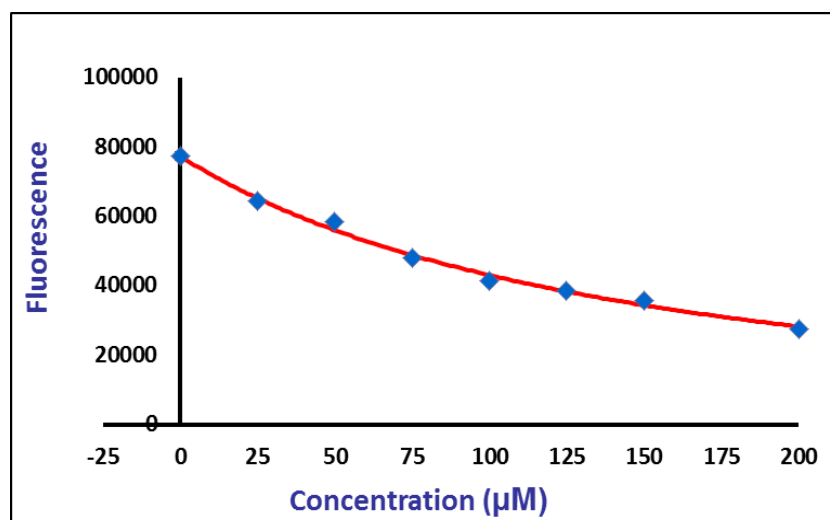

**Figure S90:** Changes in intrinsic fluorescence intensity of Tdp1 (10  $\mu\text{M}$ ) upon the addition of compound 16f(-) (25  $\mu\text{M}$ , 50  $\mu\text{M}$ , 75  $\mu\text{M}$ , 100  $\mu\text{M}$ , 125  $\mu\text{M}$ , 150  $\mu\text{M}$  and 200  $\mu\text{M}$ ). Buffer was 20 mM Tris and 250 mM NaCl (pH 8). Excitation wavelength was 280 nm and intrinsic fluorescence was measured at 350 nm. The  $K_D$  was  $148 \pm 9 \mu\text{M}$ . Experiment were conducted in triplicate.

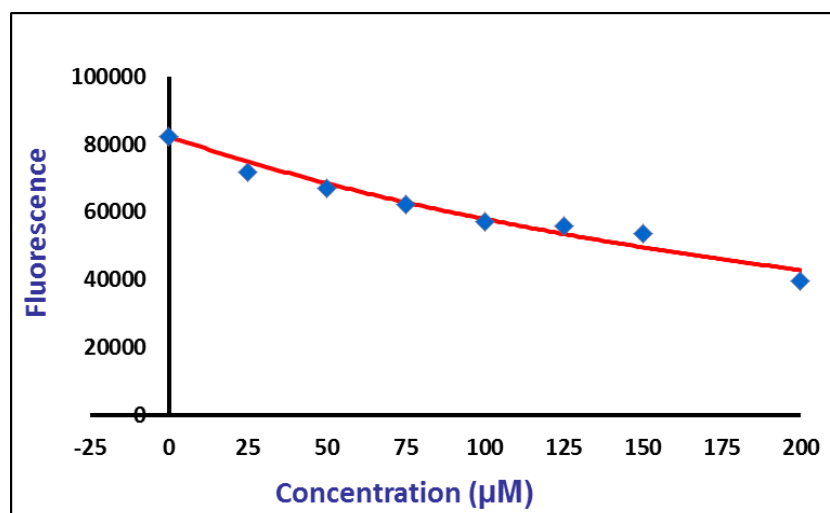

**Figure S91:** Changes in intrinsic fluorescence intensity of Tdp1 (10  $\mu\text{M}$ ) upon the addition of compound 16g(-) (25  $\mu\text{M}$ , 50  $\mu\text{M}$ , 75  $\mu\text{M}$ , 100  $\mu\text{M}$ , 125  $\mu\text{M}$ , 150  $\mu\text{M}$  and 200  $\mu\text{M}$ ). Buffer was 20 mM Tris and 250 mM NaCl (pH 8). Excitation wavelength was 280 nm and intrinsic fluorescence was measured at 350 nm. The  $K_D$  was  $281 \pm 25 \mu\text{M}$ . Experiment were conducted in triplicate.



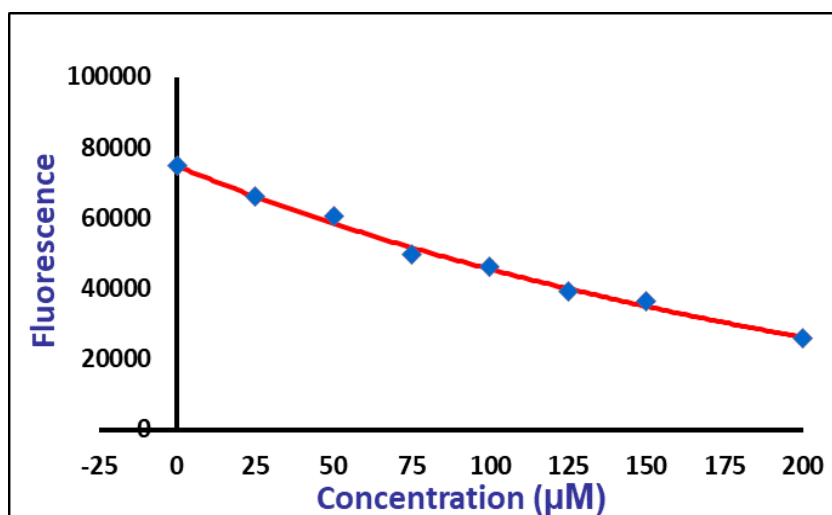

**Figure S92:** Changes in intrinsic fluorescence intensity of Tdp1 (10  $\mu\text{M}$ ) upon the addition of compound 16h(-) (25  $\mu\text{M}$ , 50  $\mu\text{M}$ , 75  $\mu\text{M}$ , 100  $\mu\text{M}$ , 125  $\mu\text{M}$ , 150  $\mu\text{M}$  and 200  $\mu\text{M}$ ). Buffer was 20 mM Tris and 250 mM NaCl (pH 8). Excitation wavelength was 280 nm and intrinsic fluorescence was measured at 350 nm. The  $K_D$  was  $355 \pm 50 \mu\text{M}$ . Experiment were conducted in triplicate.

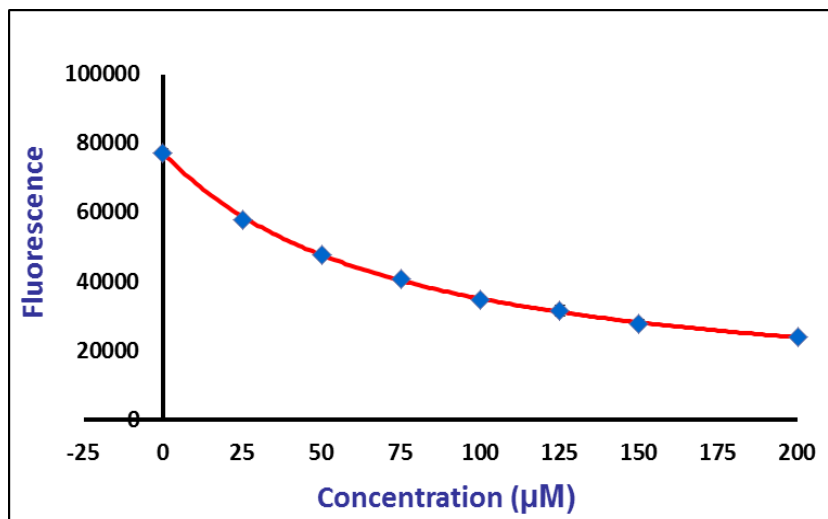

**Figure S93:** Changes in intrinsic fluorescence intensity of Tdp1 (10  $\mu\text{M}$ ) upon the addition of compound 16j(+) (25  $\mu\text{M}$ , 50  $\mu\text{M}$ , 75  $\mu\text{M}$ , 100  $\mu\text{M}$ , 125  $\mu\text{M}$ , 150  $\mu\text{M}$  and 200  $\mu\text{M}$ ). Buffer was 20 mM Tris and 250 mM NaCl (pH 8). Excitation wavelength was 280 nm and intrinsic fluorescence was measured at 350 nm. The  $K_D$  was  $65 \pm 7$   $\mu\text{M}$ . Experiment were conducted in triplicate.

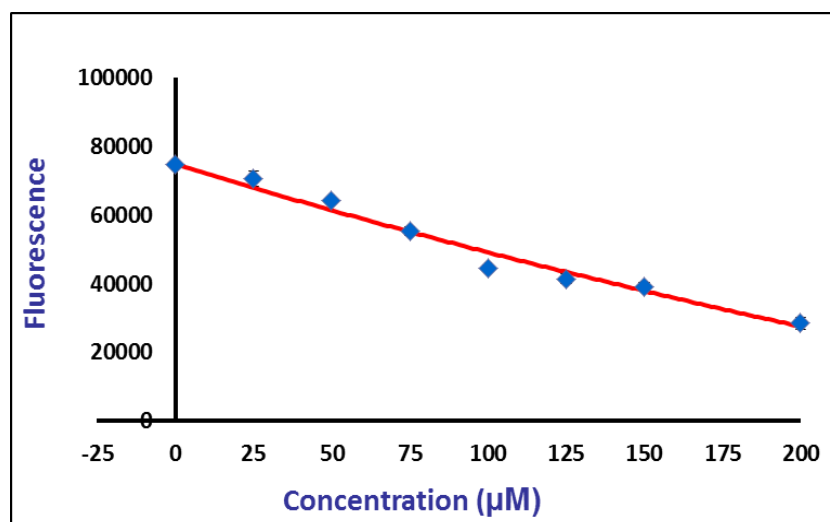

**Figure S94:** Changes in intrinsic fluorescence intensity of Tdp1 (10  $\mu\text{M}$ ) upon the addition of compound 16j(-) (25  $\mu\text{M}$ , 50  $\mu\text{M}$ , 75  $\mu\text{M}$ , 100  $\mu\text{M}$ , 125  $\mu\text{M}$ , 150  $\mu\text{M}$  and 200  $\mu\text{M}$ ). Buffer was 20 mM Tris and 250 mM NaCl (pH 8). Excitation wavelength was 280 nm and intrinsic fluorescence was measured at 350 nm. The  $K_D$  was  $771 \pm 46 \mu\text{M}$ . Experiment were conducted in triplicate.

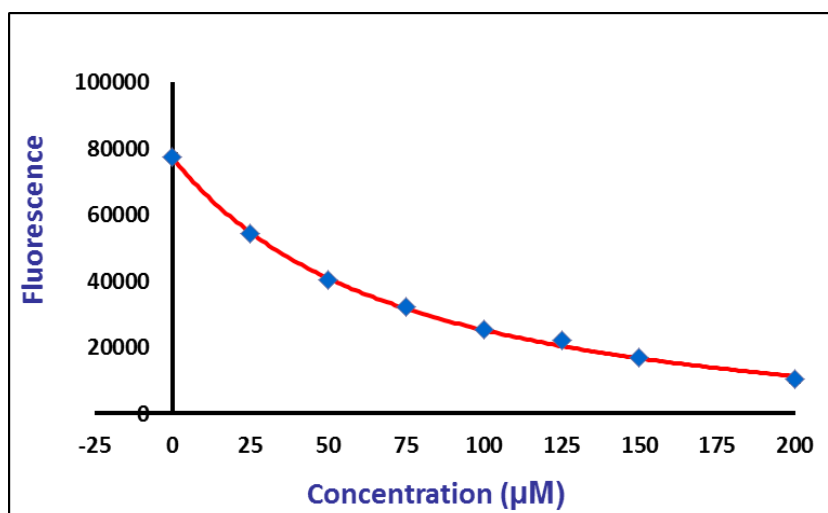

**Figure S95:** Changes in intrinsic fluorescence intensity of Tdp1 (10  $\mu\text{M}$ ) upon the addition of compound 16k(+) (25  $\mu\text{M}$ , 50  $\mu\text{M}$ , 75  $\mu\text{M}$ , 100  $\mu\text{M}$ , 125  $\mu\text{M}$ , 150  $\mu\text{M}$  and 200  $\mu\text{M}$ ). Buffer was 20 mM Tris and 250 mM NaCl (pH 8). Excitation wavelength was 280 nm and intrinsic fluorescence was measured at 350 nm. The  $K_D$  was  $67 \pm 9 \mu\text{M}$ . Experiment were conducted in triplicate.

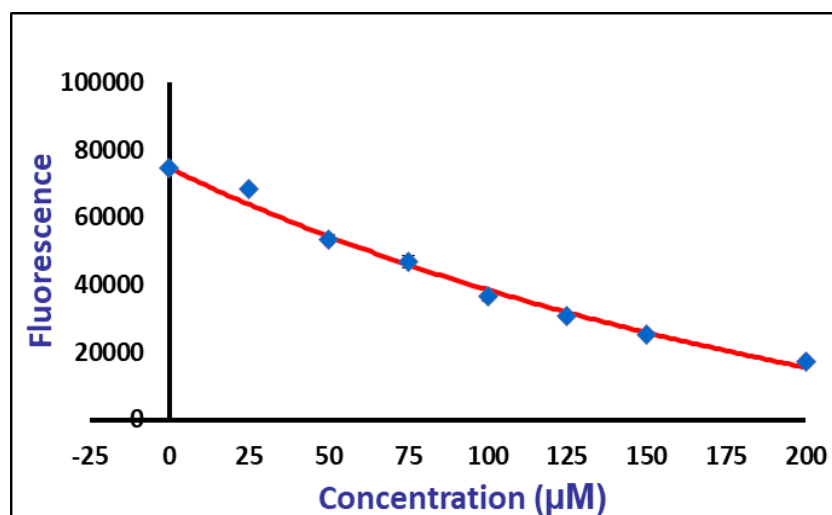

**Figure S96:** Changes in intrinsic fluorescence intensity of Tdp1 (10  $\mu\text{M}$ ) upon the addition of compound 16k(-) (25  $\mu\text{M}$ , 50  $\mu\text{M}$ , 75  $\mu\text{M}$ , 100  $\mu\text{M}$ , 125  $\mu\text{M}$ , 150  $\mu\text{M}$  and 200  $\mu\text{M}$ ). Buffer was 20 mM Tris and 250 mM NaCl (pH 8). Excitation wavelength was 280 nm and intrinsic fluorescence was measured at 350 nm. The  $K_D$  was  $250 \pm 24 \mu\text{M}$ . Experiment were conducted in triplicate.

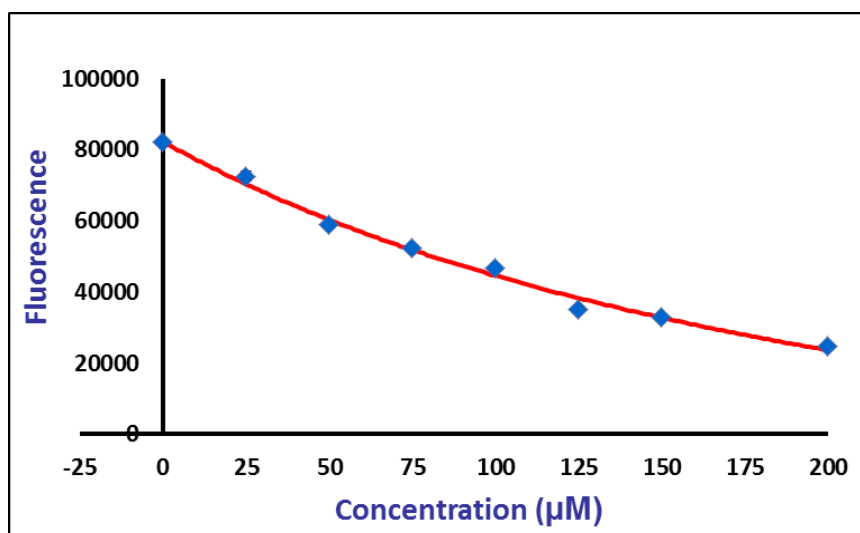

**Figure S97:** Changes in intrinsic fluorescence intensity of Tdp1 (10  $\mu\text{M}$ ) upon the addition of compound 16l(-) (25  $\mu\text{M}$ , 50  $\mu\text{M}$ , 75  $\mu\text{M}$ , 100  $\mu\text{M}$ , 125  $\mu\text{M}$ , 150  $\mu\text{M}$  and 200  $\mu\text{M}$ ). Buffer was 20 mM Tris and 250 mM NaCl (pH 8). Excitation wavelength was 280 nm and intrinsic fluorescence was measured at 350 nm. The  $K_D$  was  $233 \pm 9 \mu\text{M}$ . Experiment were conducted in triplicate.

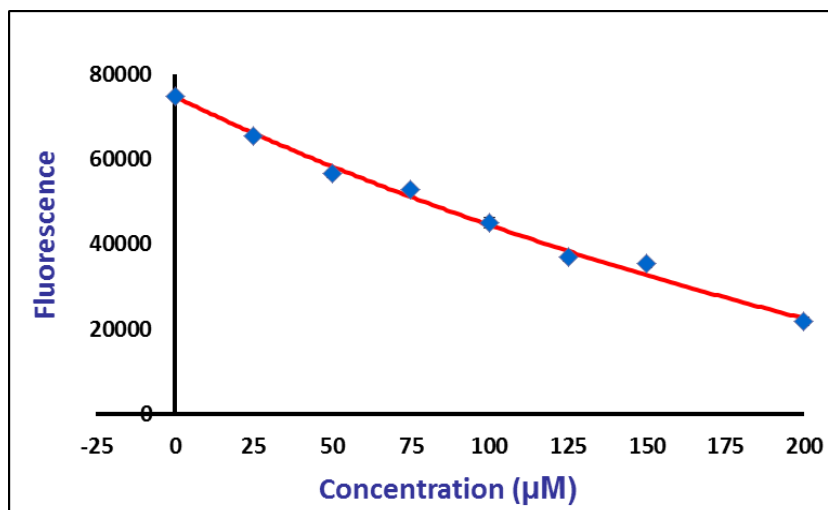

**Figure S98:** Changes in intrinsic fluorescence intensity of Tdp1 (10  $\mu\text{M}$ ) upon the addition of compound 16m(-) (25  $\mu\text{M}$ , 50  $\mu\text{M}$ , 75  $\mu\text{M}$ , 100  $\mu\text{M}$ , 125  $\mu\text{M}$ , 150  $\mu\text{M}$  and 200  $\mu\text{M}$ ). Buffer was 20 mM Tris and 250 mM NaCl (pH 8). Excitation wavelength was 280 nm and intrinsic fluorescence was measured at 350 nm. The  $K_D$  was  $354 \pm 40 \mu\text{M}$ . Experiment were conducted in triplicate.

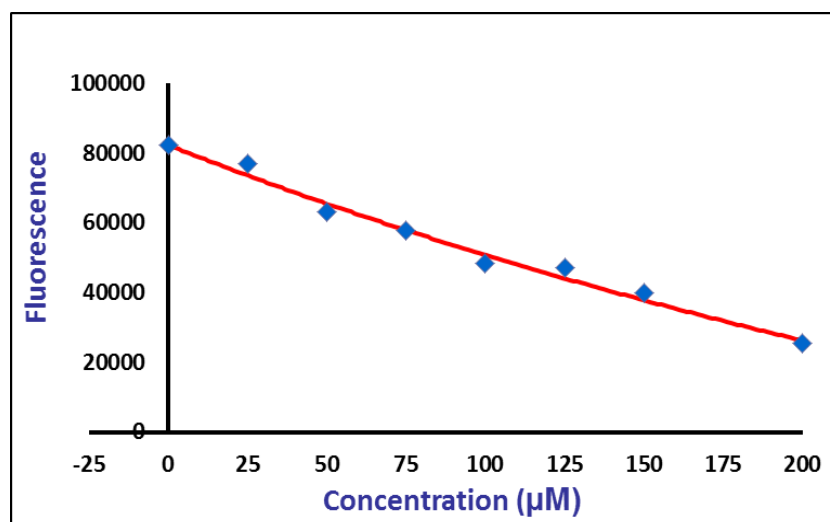

**Figure S99:** Changes in intrinsic fluorescence intensity of Tdp1 (10  $\mu\text{M}$ ) upon the addition of compound 16n(+) (25  $\mu\text{M}$ , 50  $\mu\text{M}$ , 75  $\mu\text{M}$ , 100  $\mu\text{M}$ , 125  $\mu\text{M}$ , 150  $\mu\text{M}$  and 200  $\mu\text{M}$ ). Buffer was 20 mM Tris and 250 mM NaCl (pH 8). Excitation wavelength was 280 nm and intrinsic fluorescence was measured at 350 nm. The  $K_D$  was  $719 \pm 17 \mu\text{M}$ . Experiment were conducted in triplicate.



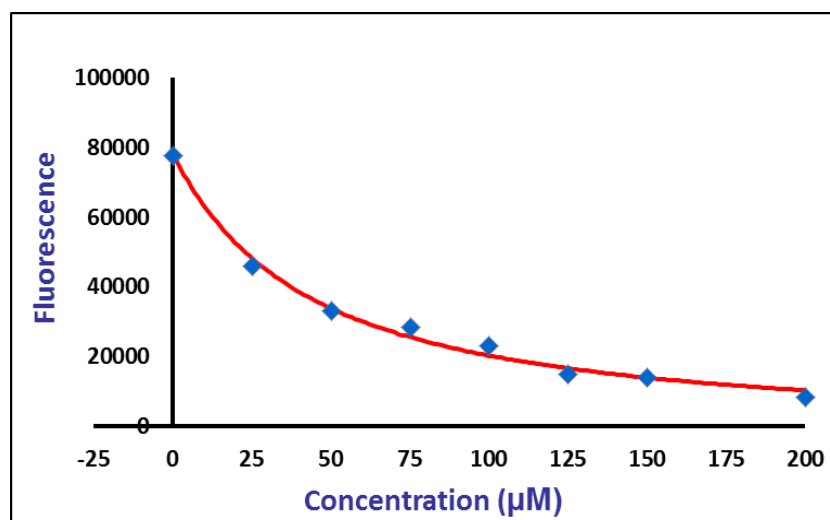

**Figure S100:** Changes in intrinsic fluorescence intensity of Tdp1 (10  $\mu\text{M}$ ) upon the addition of compound 16o(+) (25  $\mu\text{M}$ , 50  $\mu\text{M}$ , 75  $\mu\text{M}$ , 100  $\mu\text{M}$ , 125  $\mu\text{M}$ , 150  $\mu\text{M}$  and 200  $\mu\text{M}$ ). Buffer was 20 mM Tris and 250 mM NaCl (pH 8). Excitation wavelength was 280 nm and intrinsic fluorescence was measured at 350 nm. The  $K_D$  was  $38 \pm 2$   $\mu\text{M}$ . Experiment were conducted in triplicate.

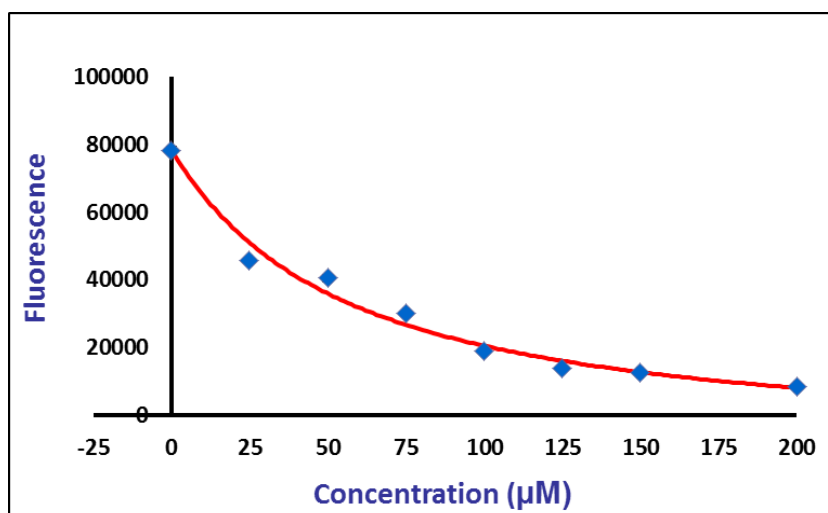

**Figure S101:** Changes in intrinsic fluorescence intensity of Tdp1 (10  $\mu\text{M}$ ) upon the addition of compound 16o(-) (25  $\mu\text{M}$ , 50  $\mu\text{M}$ , 75  $\mu\text{M}$ , 100  $\mu\text{M}$ , 125  $\mu\text{M}$ , 150  $\mu\text{M}$  and 200  $\mu\text{M}$ ). Buffer was 20 mM Tris and 250 mM NaCl (pH 8). Excitation wavelength was 280 nm and intrinsic fluorescence was measured at 350 nm. The  $K_D$  was  $51 \pm 4 \mu\text{M}$ . Experiment were conducted in triplicate.

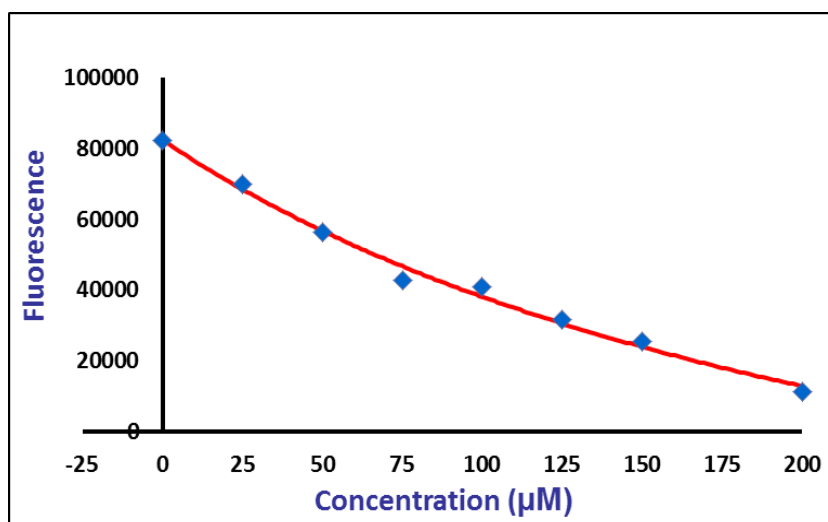

**Figure S102:** Changes in intrinsic fluorescence intensity of Tdp1 (10  $\mu\text{M}$ ) upon the addition of compound 16p(+) (25  $\mu\text{M}$ , 50  $\mu\text{M}$ , 75  $\mu\text{M}$ , 100  $\mu\text{M}$ , 125  $\mu\text{M}$ , 150  $\mu\text{M}$  and 200  $\mu\text{M}$ ). Buffer was 20 mM Tris and 250 mM NaCl (pH 8). Excitation wavelength was 280 nm and intrinsic fluorescence was measured at 350 nm. The  $K_D$  was  $268 \pm 11 \mu\text{M}$ . Experiment were conducted in triplicate.

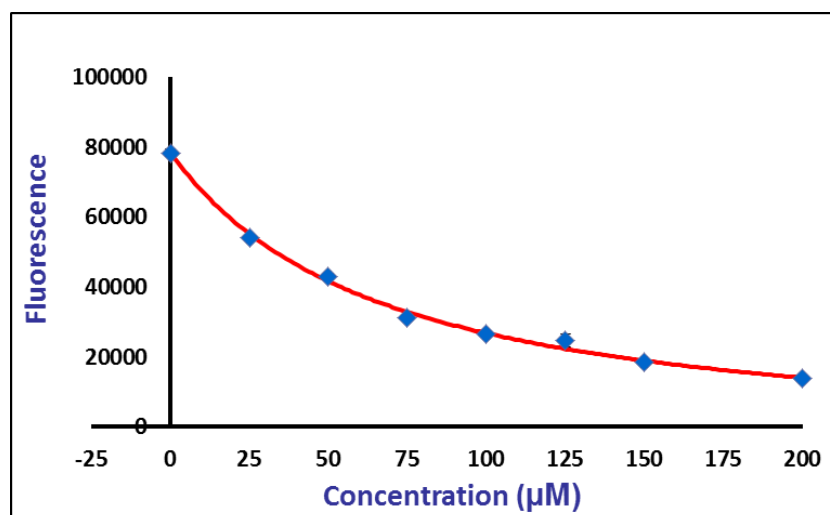

**Figure S103:** Changes in intrinsic fluorescence intensity of Tdp1 (10  $\mu\text{M}$ ) upon the addition of compound 16q(-) (25  $\mu\text{M}$ , 50  $\mu\text{M}$ , 75  $\mu\text{M}$ , 100  $\mu\text{M}$ , 125  $\mu\text{M}$ , 150  $\mu\text{M}$  and 200  $\mu\text{M}$ ). Buffer was 20 mM Tris and 250 mM NaCl (pH 8). Excitation wavelength was 280 nm and intrinsic fluorescence was measured at 350 nm. The  $K_D$  was  $58 \pm 4$   $\mu\text{M}$ . Experiment were conducted in triplicate.

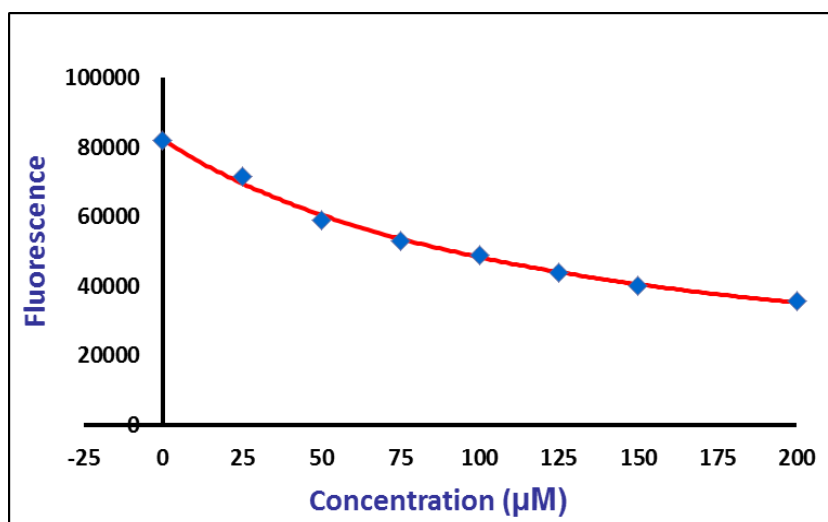

**Figure S104:** Changes in intrinsic fluorescence intensity of Tdp1 (10  $\mu\text{M}$ ) upon the addition of compound 16r(+) (25  $\mu\text{M}$ , 50  $\mu\text{M}$ , 75  $\mu\text{M}$ , 100  $\mu\text{M}$ , 125  $\mu\text{M}$ , 150  $\mu\text{M}$  and 200  $\mu\text{M}$ ). Buffer was 20 mM Tris and 250 mM NaCl (pH 8). Excitation wavelength was 280 nm and intrinsic fluorescence was measured at 350 nm. The  $K_D$  was  $113 \pm 52 \mu\text{M}$ . Experiment were conducted in triplicate.

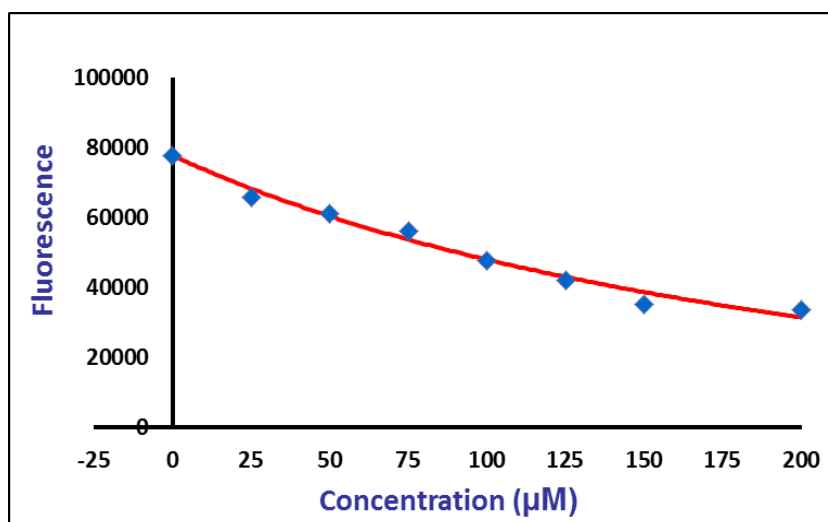

**Figure S105:** Changes in intrinsic fluorescence intensity of Tdp1 (10  $\mu\text{M}$ ) upon the addition of compound 17a(+) (25  $\mu\text{M}$ , 50  $\mu\text{M}$ , 75  $\mu\text{M}$ , 100  $\mu\text{M}$ , 125  $\mu\text{M}$ , 150  $\mu\text{M}$  and 200  $\mu\text{M}$ ). Buffer was 20 mM Tris and 250 mM NaCl (pH 8). Excitation wavelength was 280 nm and intrinsic fluorescence was measured at 350 nm. The  $K_D$  was  $212 \pm 25 \mu\text{M}$ . Experiment were conducted in triplicate.

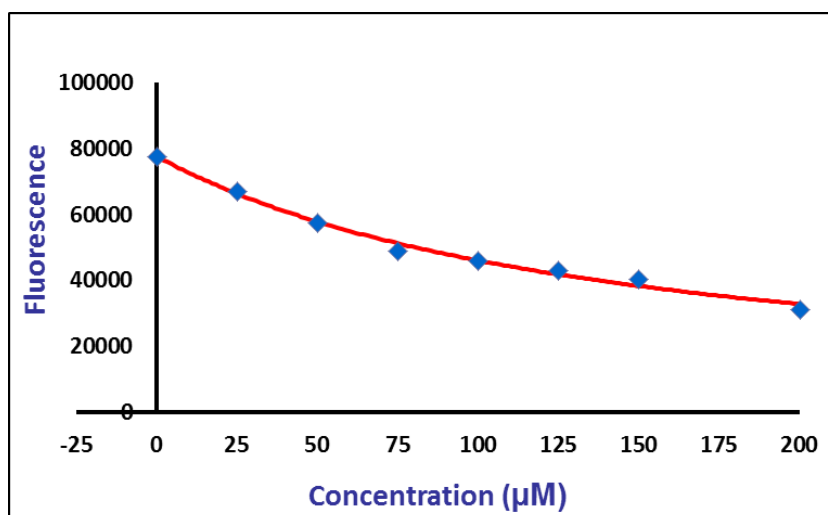

**Figure S106:** Changes in intrinsic fluorescence intensity of Tdp1 (10  $\mu\text{M}$ ) upon the addition of compound 17b(+) (25  $\mu\text{M}$ , 50  $\mu\text{M}$ , 75  $\mu\text{M}$ , 100  $\mu\text{M}$ , 125  $\mu\text{M}$ , 150  $\mu\text{M}$  and 200  $\mu\text{M}$ ). Buffer was 20 mM Tris and 250 mM NaCl (pH 8). Excitation wavelength was 280 nm and intrinsic fluorescence was measured at 350 nm. The  $K_D$  was  $131 \pm 15 \mu\text{M}$ . Experiment were conducted in triplicate.

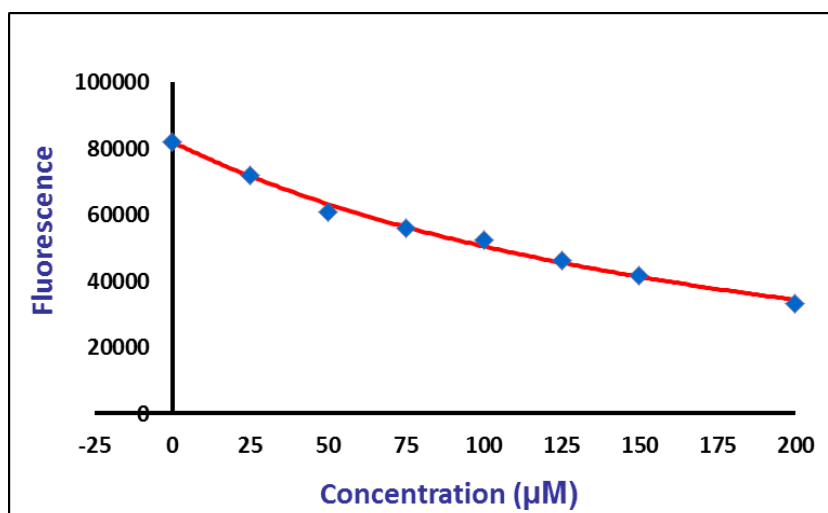

**Figure S107:** Changes in intrinsic fluorescence intensity of Tdp1 (10  $\mu\text{M}$ ) upon the addition of compound 17c(+) (25  $\mu\text{M}$ , 50  $\mu\text{M}$ , 75  $\mu\text{M}$ , 100  $\mu\text{M}$ , 125  $\mu\text{M}$ , 150  $\mu\text{M}$  and 200  $\mu\text{M}$ ). Buffer was 20 mM Tris and 250 mM NaCl (pH 8). Excitation wavelength was 280 nm and intrinsic fluorescence was measured at 350 nm. The  $K_D$  was  $204 \pm 23 \mu\text{M}$ . Experiment were conducted in triplicate.



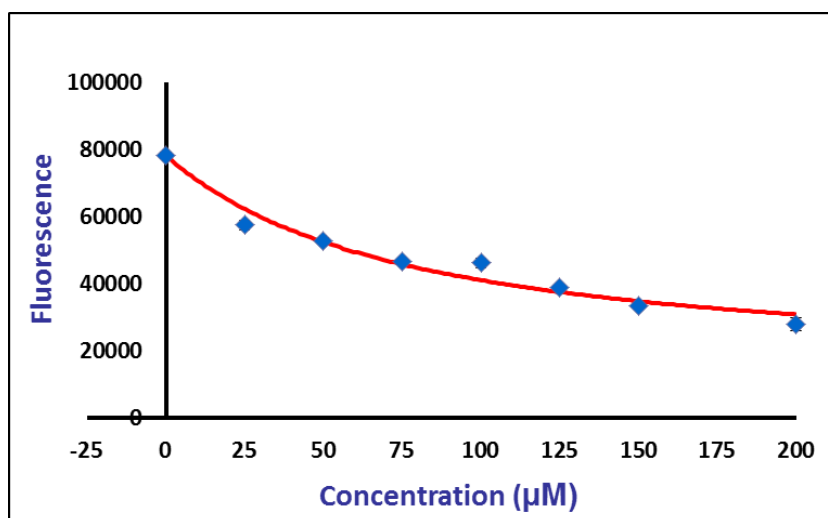

**Figure S108:** Changes in intrinsic fluorescence intensity of Tdp1 (10  $\mu\text{M}$ ) upon the addition of compound 17c(-) (25  $\mu\text{M}$ , 50  $\mu\text{M}$ , 75  $\mu\text{M}$ , 100  $\mu\text{M}$ , 125  $\mu\text{M}$ , 150  $\mu\text{M}$  and 200  $\mu\text{M}$ ). Buffer was 20 mM Tris and 250 mM NaCl (pH 8). Excitation wavelength was 280 nm and intrinsic fluorescence was measured at 350 nm. The  $K_D$  was  $74 \pm 4 \mu\text{M}$ . Experiment were conducted in triplicate.

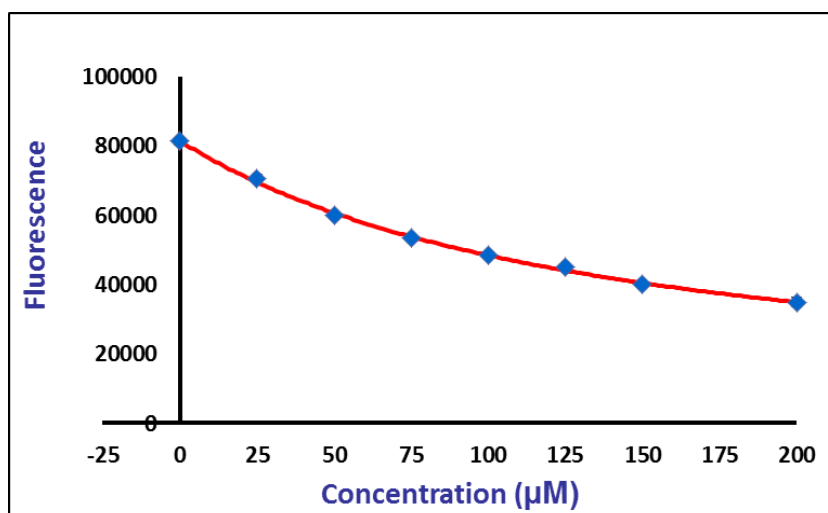

**Figure S109:** Changes in intrinsic fluorescence intensity of Tdp1 (10  $\mu\text{M}$ ) upon the addition of compound 17d(+) (25  $\mu\text{M}$ , 50  $\mu\text{M}$ , 75  $\mu\text{M}$ , 100  $\mu\text{M}$ , 125  $\mu\text{M}$ , 150  $\mu\text{M}$  and 200  $\mu\text{M}$ ). Buffer was 20 mM Tris and 250 mM NaCl (pH 8). Excitation wavelength was 280 nm and intrinsic fluorescence was measured at 350 nm. The  $K_D$  was  $130 \pm 29 \mu\text{M}$ . Experiment were conducted in triplicate.

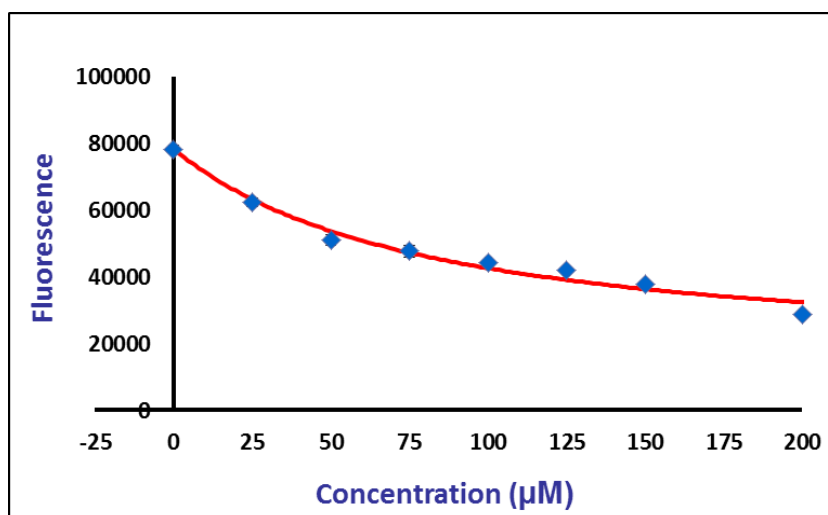

**Figure S110:** Changes in intrinsic fluorescence intensity of Tdp1 (10  $\mu\text{M}$ ) upon the addition of compound 17d(-) (25  $\mu\text{M}$ , 50  $\mu\text{M}$ , 75  $\mu\text{M}$ , 100  $\mu\text{M}$ , 125  $\mu\text{M}$ , 150  $\mu\text{M}$  and 200  $\mu\text{M}$ ). Buffer was 20 mM Tris and 250 mM NaCl (pH 8). Excitation wavelength was 280 nm and intrinsic fluorescence was measured at 350 nm. The  $K_D$  was  $76 \pm 5 \mu\text{M}$ . Experiment were conducted in triplicate.

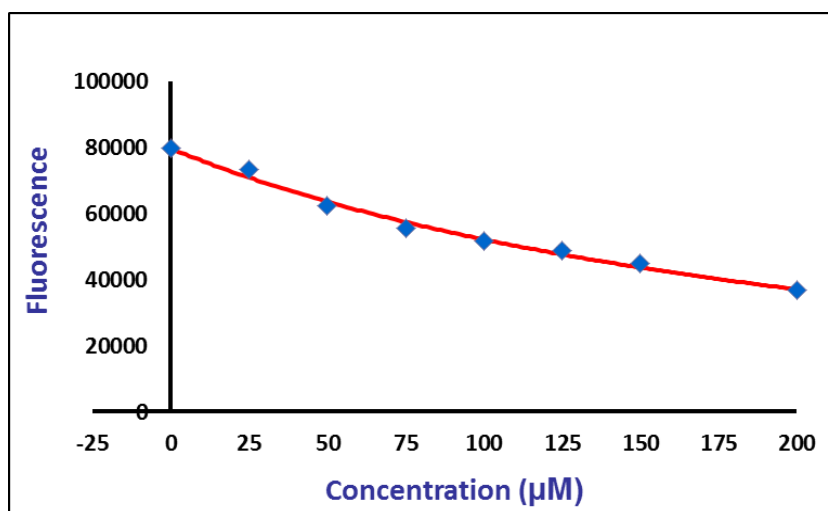

**Figure S111:** Changes in intrinsic fluorescence intensity of Tdp1 (10  $\mu\text{M}$ ) upon the addition of compound 17e(+) (25  $\mu\text{M}$ , 50  $\mu\text{M}$ , 75  $\mu\text{M}$ , 100  $\mu\text{M}$ , 125  $\mu\text{M}$ , 150  $\mu\text{M}$  and 200  $\mu\text{M}$ ). Buffer was 20 mM Tris and 250 mM NaCl (pH 8). Excitation wavelength was 280 nm and intrinsic fluorescence was measured at 350 nm. The  $K_D$  was  $213 \pm 4 \mu\text{M}$ . Experiment were conducted in triplicate.

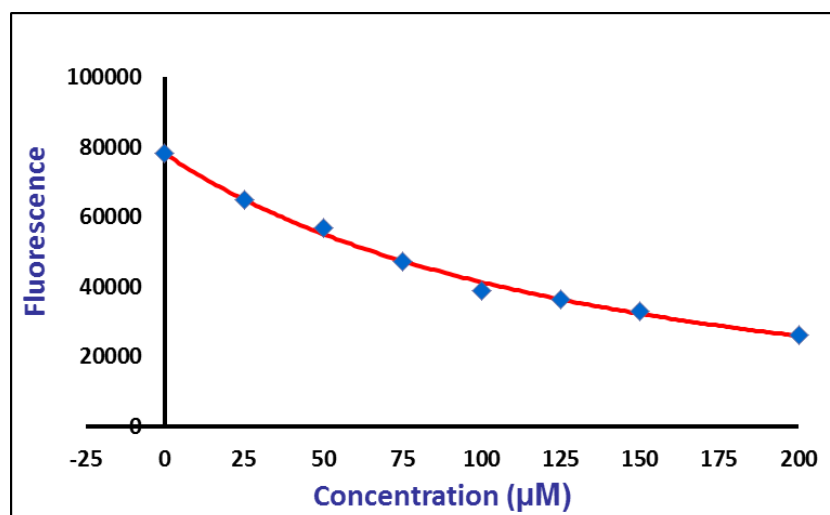

**Figure S 112:** Changes in intrinsic fluorescence intensity of Tdp1 (10  $\mu\text{M}$ ) upon the addition of compound 17e(-) (25  $\mu\text{M}$ , 50  $\mu\text{M}$ , 75  $\mu\text{M}$ , 100  $\mu\text{M}$ , 125  $\mu\text{M}$ , 150  $\mu\text{M}$  and 200  $\mu\text{M}$ ). Buffer was 20 mM Tris and 250 mM NaCl (pH 8). Excitation wavelength was 280 nm and intrinsic fluorescence was measured at 350 nm. The  $K_D$  was  $130 \pm 8 \mu\text{M}$ . Experiment were conducted in triplicate.

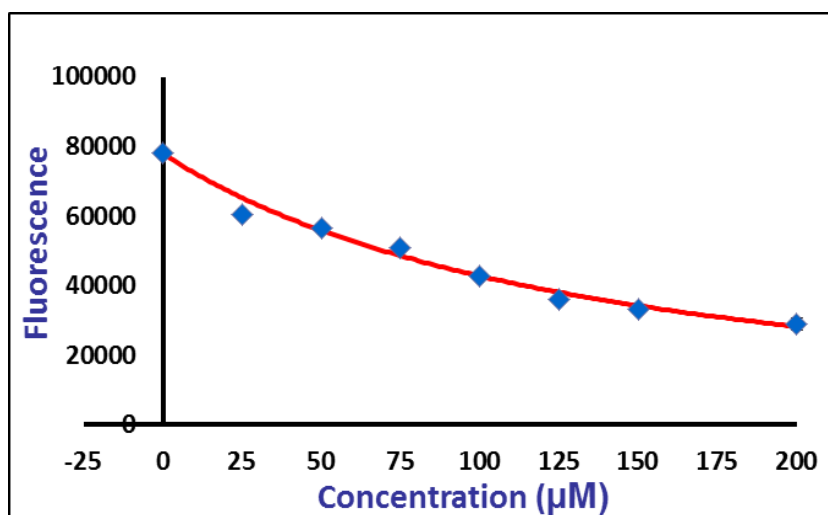

**Figure S113:** Changes in intrinsic fluorescence intensity of Tdp1 (10  $\mu\text{M}$ ) upon the addition of compound 17f(+) (25  $\mu\text{M}$ , 50  $\mu\text{M}$ , 75  $\mu\text{M}$ , 100  $\mu\text{M}$ , 125  $\mu\text{M}$ , 150  $\mu\text{M}$  and 200  $\mu\text{M}$ ). Buffer was 20 mM Tris and 250 mM NaCl (pH 8). Excitation wavelength was 280 nm and intrinsic fluorescence was measured at 350 nm. The  $K_D$  was  $127 \pm 14 \mu\text{M}$ . Experiment were conducted in triplicate.

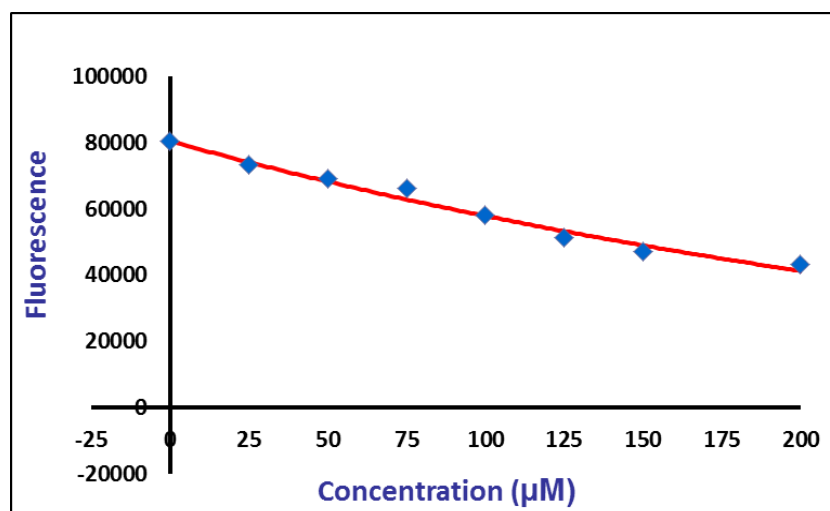

**Figure S114:** Changes in intrinsic fluorescence intensity of Tdp1 (10  $\mu\text{M}$ ) upon the addition of compound 17f(-) (25  $\mu\text{M}$ , 50  $\mu\text{M}$ , 75  $\mu\text{M}$ , 100  $\mu\text{M}$ , 125  $\mu\text{M}$ , 150  $\mu\text{M}$  and 200  $\mu\text{M}$ ). Buffer was 20 mM Tris and 250 mM NaCl (pH 8). Excitation wavelength was 280 nm and intrinsic fluorescence was measured at 350 nm. The  $K_D$  was  $536 \pm 90 \mu\text{M}$ . Experiment were conducted in triplicate.

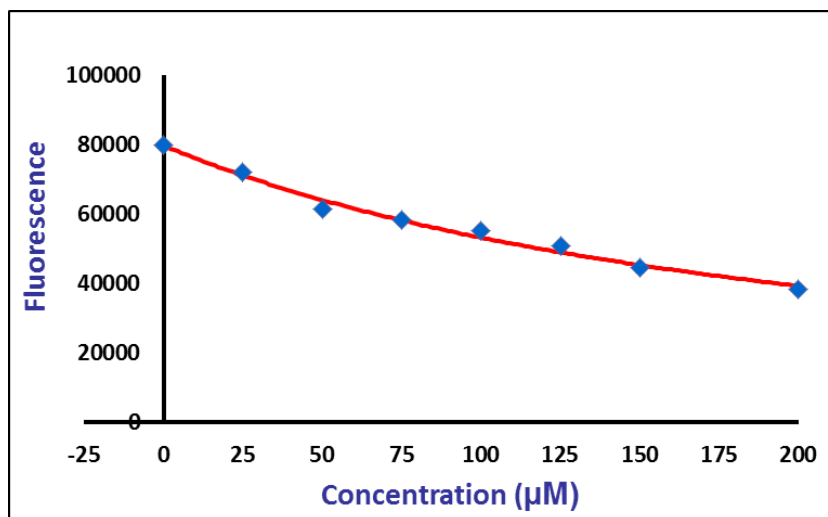

**Figure S115:** Changes in intrinsic fluorescence intensity of Tdp1 (10  $\mu\text{M}$ ) upon the addition of compound 17g(+) (25  $\mu\text{M}$ , 50  $\mu\text{M}$ , 75  $\mu\text{M}$ , 100  $\mu\text{M}$ , 125  $\mu\text{M}$ , 150  $\mu\text{M}$  and 200  $\mu\text{M}$ ). Buffer was 20 mM Tris and 250 mM NaCl (pH 8). Excitation wavelength was 280 nm and intrinsic fluorescence was measured at 350 nm. The  $K_D$  was  $223 \pm 42 \mu\text{M}$ . Experiment were conducted in triplicate.



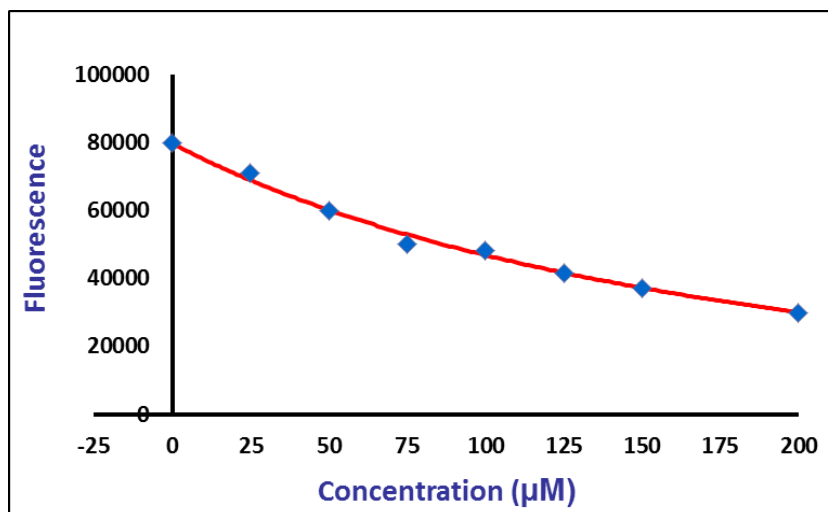

**Figure S116:** Changes in intrinsic fluorescence intensity of Tdp1 (10  $\mu\text{M}$ ) upon the addition of compound 17h(+) (25  $\mu\text{M}$ , 50  $\mu\text{M}$ , 75  $\mu\text{M}$ , 100  $\mu\text{M}$ , 125  $\mu\text{M}$ , 150  $\mu\text{M}$  and 200  $\mu\text{M}$ ). Buffer was 20 mM Tris and 250 mM NaCl (pH 8). Excitation wavelength was 280 nm and intrinsic fluorescence was measured at 350 nm. The  $K_D$  was  $188 \pm 22 \mu\text{M}$ . Experiment were conducted in triplicate.

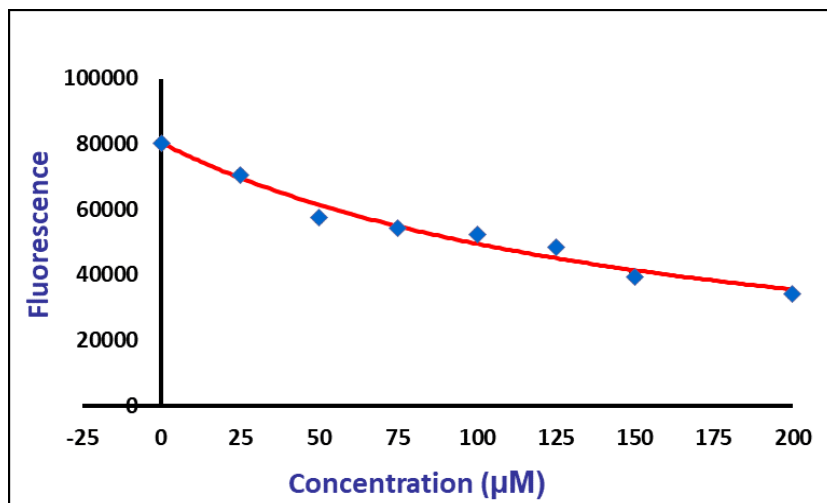

**Figure S117:** Changes in intrinsic fluorescence intensity of Tdp1 (10  $\mu\text{M}$ ) upon the addition of compound 17i(+) (25  $\mu\text{M}$ , 50  $\mu\text{M}$ , 75  $\mu\text{M}$ , 100  $\mu\text{M}$ , 125  $\mu\text{M}$ , 150  $\mu\text{M}$  and 200  $\mu\text{M}$ ). Buffer was 20 mM Tris and 250 mM NaCl (pH 8). Excitation wavelength was 280 nm and intrinsic fluorescence was measured at 350 nm. The  $K_D$  was  $161 \pm 22 \mu\text{M}$ . Experiment were conducted in triplicate.

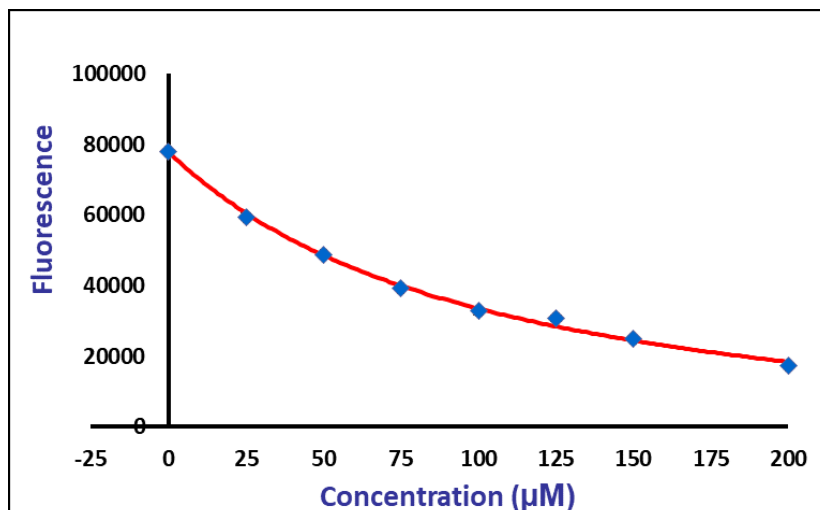

**Figure S 118:** Changes in intrinsic fluorescence intensity of Tdp1 (10  $\mu\text{M}$ ) upon the addition of compound 17j(+) (25  $\mu\text{M}$ , 50  $\mu\text{M}$ , 75  $\mu\text{M}$ , 100  $\mu\text{M}$ , 125  $\mu\text{M}$ , 150  $\mu\text{M}$  and 200  $\mu\text{M}$ ). Buffer was 20 mM Tris and 250 mM NaCl (pH 8). Excitation wavelength was 280 nm and intrinsic fluorescence was measured at 350 nm. The  $K_D$  was  $69 \pm 14 \mu\text{M}$ . Experiment were conducted in triplicate.

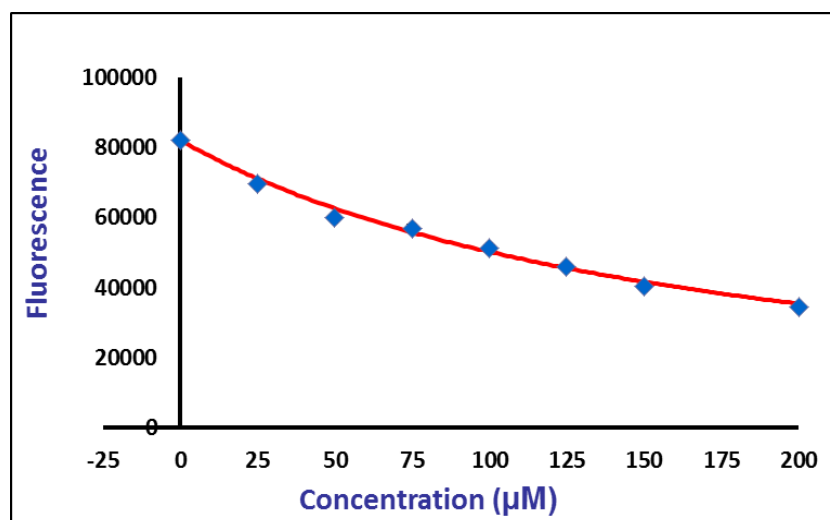

**Figure S 119:** Changes in intrinsic fluorescence intensity of Tdp1 (10  $\mu\text{M}$ ) upon the addition of compound 17k(+) (25  $\mu\text{M}$ , 50  $\mu\text{M}$ , 75  $\mu\text{M}$ , 100  $\mu\text{M}$ , 125  $\mu\text{M}$ , 150  $\mu\text{M}$  and 200  $\mu\text{M}$ ). Buffer was 20 mM Tris and 250 mM NaCl (pH 8). Excitation wavelength was 280 nm and intrinsic fluorescence was measured at 350 nm. The  $K_D$  was  $156 \pm 8 \mu\text{M}$ . Experiment were conducted in triplicate.

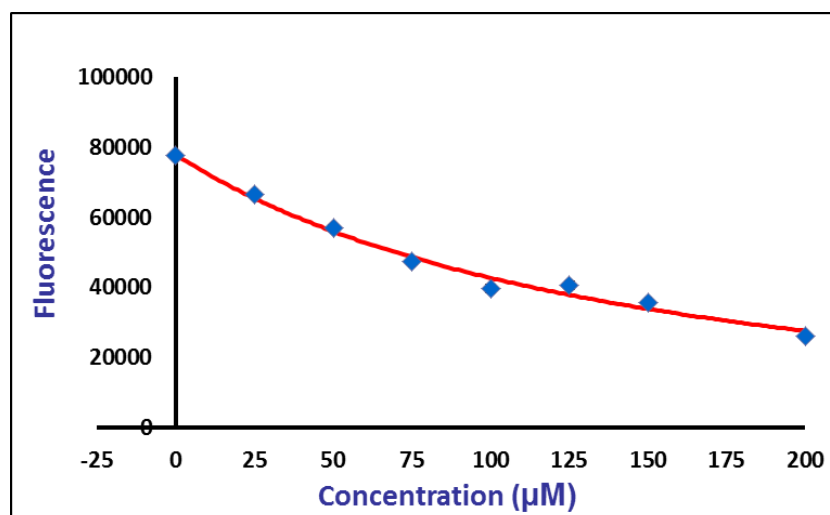

**Figure S120:** Changes in intrinsic fluorescence intensity of Tdp1 (10  $\mu\text{M}$ ) upon the addition of compound 17k(-) (25  $\mu\text{M}$ , 50  $\mu\text{M}$ , 75  $\mu\text{M}$ , 100  $\mu\text{M}$ , 125  $\mu\text{M}$ , 150  $\mu\text{M}$  and 200  $\mu\text{M}$ ). Buffer was 20 mM Tris and 250 mM NaCl (pH 8). Excitation wavelength was 280 nm and intrinsic fluorescence was measured at 350 nm. The  $K_D$  was  $142 \pm 11 \mu\text{M}$ . Experiment were conducted in triplicate.

**Table S17:** RMSD values of for heavy atoms between the co-crystallized benzene-1,2,4-tricarboxylic acid (6DIE) and the docked molecule.

| POSE    | ASP          |              | CHEMPLP      |              | CHEMSCORE    |              | GOLDScore    |              |
|---------|--------------|--------------|--------------|--------------|--------------|--------------|--------------|--------------|
|         | WATER        | NO WATER     | WATER        | NO WATER     | WATER        | NO WATER     | WATER        | NO WATER     |
| 1       | 2.890        | 2.912        | 2.748        | 4.825        | 0.568        | 8.145        | 9.505        | 4.019        |
| 2       | 2.869        | 2.906        | 2.956        | 4.774        | 0.631        | 2.773        | 9.486        | 3.922        |
| 3       | 2.929        | 2.785        | 2.752        | 3.668        | 0.639        | 2.751        | 9.797        | 4.132        |
| Average | <b>2.896</b> | <b>2.868</b> | <b>2.818</b> | <b>4.422</b> | <b>0.613</b> | <b>4.557</b> | <b>9.596</b> | <b>4.024</b> |

**Table S18:** Scores of the scoring function from the docked ligands with and without water.

| COMPOUND | ASP   |          | CHEMPLP |          | CHEMSCORE |          | GOLDScore |          |
|----------|-------|----------|---------|----------|-----------|----------|-----------|----------|
|          | WATER | NO WATER | WATER   | NO WATER | WATER     | NO WATER | WATER     | NO WATER |
| (+)-16a  | 38.9  | 36.1     | 69.7    | 64.5     | 28.9      | 27.9     | 66.6      | 69.0     |
| (-)-16a  | 38.0  | 33.2     | 66.3    | 54.5     | 29.3      | 23.7     | 71.1      | 69.5     |
| (+)-16b  | 39.4  | 33.1     | 66.9    | 57.9     | 30.0      | 28.6     | 67.7      | 66.5     |
| (-)-16b  | 33.2  | 33.8     | 70.9    | 61.0     | 27.7      | 23.1     | 74.7      | 67.9     |
| (+)-16c  | 38.8  | 34.0     | 64.8    | 55.4     | 29.2      | 28.7     | 66.0      | 66.6     |
| (-)-16c  | 37.2  | 33.1     | 73.2    | 63.3     | 30.5      | 23.1     | 67.6      | 70.1     |
| (+)-16d  | 40.4  | 37.6     | 63.7    | 63.7     | 30.8      | 26.2     | 72.8      | 68.6     |
| (-)-16d  | 41.0  | 38.7     | 71.3    | 68.7     | 29.1      | 28.6     | 81.3      | 59.9     |
| (+)-16e  | 38.7  | 34.4     | 65.6    | 67.7     | 31.4      | 26.9     | 73.9      | 68.6     |
| (-)-16e  | 38.8  | 35.5     | 71.6    | 65.6     | 31.2      | 29.2     | 78.4      | 66.9     |
| (+)-16f  | 38.4  | 32.8     | 65.7    | 62.5     | 31.7      | 28.2     | 78.7      | 67.8     |
| (-)-16f  | 38.6  | 34.8     | 73.0    | 67.4     | 30.9      | 28.3     | 79.4      | 72.5     |
| (+)-16g  | 38.1  | 32.9     | 69.5    | 61.6     | 29.8      | 26.3     | 71.5      | 67.0     |
| (-)-16g  | 39.1  | 34.6     | 71.9    | 67.8     | 31.6      | 29.0     | 77.3      | 60.3     |
| (+)-16h  | 37.6  | 33.0     | 68.9    | 64.7     | 32.0      | 28.4     | 71.8      | 70.5     |
| (-)-16h  | 39.7  | 36.3     | 70.5    | 75.9     | 31.8      | 27.0     | 78.6      | 61.6     |
| (+)-16i  | 38.2  | 33.1     | 65.5    | 62.5     | 31.2      | 28.0     | 72.8      | 68.7     |
| (-)-16i  | 38.4  | 35.5     | 70.8    | 66.8     | 32.2      | 28.4     | 75.3      | 65.5     |
| (+)-16j  | 37.9  | 31.3     | 68.4    | 60.2     | 28.3      | 25.1     | 68.8      | 65.3     |
| (-)-16j  | 35.4  | 35.2     | 65.4    | 68.9     | 30.3      | 29.0     | 74.5      | 63.0     |
| (+)-16k  | 39.7  | 32.4     | 64.7    | 56.7     | 31.1      | 26.6     | 69.4      | 65.0     |
| (-)-16k  | 38.6  | 34.8     | 68.2    | 65.4     | 30.5      | 27.8     | 74.2      | 59.7     |
| (+)-16l  | 41.0  | 33.3     | 64.4    | 60.2     | 30.4      | 24.7     | 66.1      | 63.0     |
| (-)-16l  | 38.7  | 36.0     | 67.8    | 63.4     | 28.6      | 26.3     | 73.7      | 61.0     |
| (+)-16m  | 38.0  | 32.5     | 66.7    | 63.2     | 31.9      | 26.8     | 66.6      | 63.6     |
| (-)-16m  | 39.5  | 35.4     | 70.7    | 65.9     | 30.9      | 29.6     | 75.4      | 59.2     |

|         |      |      |      |      |      |      |      |      |
|---------|------|------|------|------|------|------|------|------|
| (+)-16n | 40.4 | 33.0 | 72.2 | 63.5 | 29.2 | 26.6 | 71.3 | 63.5 |
| (-)-16n | 38.3 | 35.4 | 74.0 | 67.6 | 31.4 | 27.1 | 74.9 | 65.5 |
| (+)-16o | 42.7 | 37.1 | 64.3 | 56.4 | 29.2 | 23.2 | 67.6 | 64.6 |
| (-)-16o | 40.7 | 39.3 | 66.0 | 60.0 | 30.5 | 28.5 | 75.2 | 57.8 |
| (+)-16p | 42.7 | 37.0 | 75.9 | 71.4 | 34.1 | 29.2 | 76.3 | 74.1 |
| (-)-16p | 41.7 | 38.9 | 79.1 | 79.2 | 28.8 | 32.5 | 79.9 | 59.0 |
| (+)-16q | 43.1 | 35.8 | 67.4 | 68.5 | 30.4 | 28.9 | 70.9 | 77.6 |
| (-)-16q | 41.8 | 38.6 | 74.8 | 75.7 | 31.2 | 32.3 | 84.1 | 74.8 |
| (+)-16r | 42.2 | 35.6 | 76.7 | 68.7 | 33.0 | 28.2 | 89.9 | 79.3 |
| (-)-16r | 44.8 | 39.6 | 76.1 | 81.7 | 33.7 | 31.5 | 89.2 | 85.5 |
| (+)-17a | 46.7 | 40.2 | 82.8 | 79.2 | 33.7 | 24.5 | 79.4 | 79.7 |
| (-)-17a | 49.0 | 40.2 | 81.2 | 81.4 | 30.5 | 35.8 | 90.0 | 78.0 |
| (+)-17b | 47.9 | 38.2 | 88.7 | 75.1 | 31.2 | 26.9 | 82.6 | 74.0 |
| (-)-17b | 46.9 | 41.9 | 81.1 | 82.6 | 29.2 | 35.1 | 92.1 | 76.5 |
| (+)-17c | 47.1 | 38.1 | 82.7 | 78.5 | 29.2 | 28.2 | 78.0 | 81.0 |
| (-)-17c | 46.9 | 42.7 | 79.4 | 79.8 | 30.8 | 30.7 | 91.8 | 84.9 |
| (+)-17d | 47.7 | 38.4 | 84.2 | 76.9 | 31.8 | 28.1 | 88.5 | 75.1 |
| (-)-17d | 47.5 | 43.7 | 85.9 | 83.5 | 29.2 | 36.0 | 94.7 | 78.1 |
| (+)-17e | 47.4 | 40.9 | 82.8 | 80.4 | 28.5 | 26.5 | 81.1 | 75.6 |
| (-)-17e | 51.4 | 40.9 | 82.5 | 83.0 | 28.9 | 31.8 | 87.4 | 70.8 |
| (+)-17f | 48.3 | 39.2 | 78.1 | 76.5 | 33.2 | 26.7 | 90.4 | 75.5 |
| (-)-17f | 46.9 | 42.3 | 79.9 | 81.3 | 30.9 | 31.2 | 96.0 | 73.8 |
| (+)-17g | 46.7 | 35.8 | 85.1 | 81.7 | 33.4 | 30.2 | 88.7 | 78.3 |
| (-)-17g | 48.4 | 41.6 | 85.6 | 80.0 | 32.1 | 35.0 | 93.4 | 95.8 |
| (+)-17h | 46.3 | 37.3 | 85.5 | 79.2 | 33.5 | 30.2 | 78.5 | 80.6 |
| (-)-17h | 48.3 | 39.1 | 85.1 | 78.5 | 34.4 | 32.3 | 90.1 | 89.2 |
| (+)-17i | 49.2 | 41.8 | 93.3 | 83.8 | 30.9 | 31.5 | 81.1 | 78.4 |
| (-)-17i | 49.9 | 39.0 | 84.1 | 74.3 | 31.6 | 31.3 | 83.4 | 78.1 |
| (+)-17j | 53.6 | 40.4 | 88.4 | 86.7 | 33.2 | 28.3 | 83.0 | 82.4 |
| (+)-17k | 47.6 | 43.1 | 78.7 | 73.9 | 30.4 | 24.9 | 76.9 | 84.9 |
| (-)-17j | 47.7 | 38.0 | 83.8 | 80.8 | 30.9 | 28.4 | 94.8 | 87.1 |
| (-)-17k | 48.5 | 41.4 | 83.5 | 77.3 | 27.9 | 30.5 | 77.5 | 80.1 |

**Table S19:** The calculated molecular descriptors for the ligands.

| <b>Compound</b> | <b>MW</b> | <b>HB Donor</b> | <b>HB Acceptor</b> | <b>LogP</b> | <b>PSA</b> | <b>Rot. bonds</b> |
|-----------------|-----------|-----------------|--------------------|-------------|------------|-------------------|
| (+)-16a         | 504.5     | 3               | 11.3               | 2.0         | 147.5      | 8                 |
| (-)-16a         | 504.5     | 3               | 11.3               | 2.0         | 146.0      | 8                 |
| (+)-16b         | 504.5     | 3               | 10.8               | 2.4         | 146.7      | 8                 |
| (-)-16b         | 504.5     | 3               | 10.8               | 2.3         | 145.0      | 8                 |
| (+)-16c         | 504.5     | 3               | 11.3               | 2.0         | 147.5      | 8                 |
| (-)-16c         | 504.5     | 3               | 11.3               | 2.0         | 145.9      | 8                 |
| (+)-16d         | 554.5     | 3               | 10.8               | 2.1         | 181.6      | 9                 |
| (-)-16d         | 554.5     | 3               | 10.8               | 2.0         | 180.4      | 9                 |
| (+)-16e         | 523.6     | 3               | 9.8                | 3.0         | 136.2      | 8                 |
| (-)-16e         | 523.6     | 3               | 9.8                | 3.0         | 134.5      | 8                 |
| (+)-16f         | 588.4     | 3               | 9.8                | 3.3         | 136.2      | 8                 |
| (-)-16f         | 588.4     | 3               | 9.8                | 3.2         | 134.4      | 8                 |
| (+)-16g         | 509.6     | 3               | 9.8                | 2.7         | 136.3      | 8                 |
| (-)-16g         | 509.6     | 3               | 9.8                | 2.7         | 134.6      | 8                 |
| (+)-16h         | 588.5     | 3               | 9.8                | 3.3         | 136.2      | 8                 |
| (-)-16h         | 588.4     | 3               | 9.8                | 3.2         | 134.6      | 8                 |
| (+)-16i         | 523.6     | 3               | 9.8                | 3.0         | 136.2      | 8                 |
| (-)-16i         | 523.6     | 3               | 9.8                | 2.9         | 134.5      | 8                 |
| (+)-16j         | 509.6     | 3               | 9.8                | 2.7         | 135.7      | 8                 |
| (-)-16j         | 509.6     | 3               | 9.8                | 3.0         | 132.5      | 8                 |
| (+)-16k         | 493.5     | 3               | 10.3               | 2.4         | 144.1      | 8                 |
| (-)-16k         | 493.5     | 3               | 10.3               | 2.4         | 142.5      | 8                 |
| (+)-16l         | 493.5     | 3               | 10.3               | 2.2         | 143.5      | 8                 |
| (-)-16l         | 493.5     | 3               | 10.3               | 2.2         | 141.9      | 8                 |
| (+)-16m         | 492.5     | 4               | 9.8                | 2.4         | 148.2      | 8                 |
| (-)-16m         | 492.5     | 4               | 9.8                | 2.4         | 146.7      | 8                 |
| (+)-16n         | 506.5     | 3               | 9.8                | 3.1         | 135.8      | 8                 |
| (-)-16n         | 506.5     | 3               | 9.8                | 3.2         | 134.4      | 8                 |
| (+)-16o         | 493.5     | 4               | 11.3               | 1.5         | 162.2      | 8                 |
| (-)-16o         | 493.5     | 4               | 11.3               | 1.5         | 160.7      | 8                 |
| (+)-16p         | 542.6     | 4               | 9.8                | 2.9         | 147.3      | 8                 |
| (-)-16p         | 542.6     | 4               | 9.8                | 2.8         | 145.9      | 8                 |
| (+)-16q         | 556.6     | 4               | 9.8                | 3.2         | 146.7      | 8                 |
| (-)-16q         | 556.6     | 4               | 9.8                | 3.2         | 145.4      | 8                 |
| (+)-16r         | 604.0     | 3               | 10.3               | 3.8         | 138.0      | 8                 |
| (-)-16r         | 604.0     | 3               | 10.3               | 4.7         | 151.2      | 8                 |
| (+)-17a         | 657.7     | 3               | 11.3               | 4.4         | 140.9      | 12                |
| (-)-17a         | 657.7     | 3               | 11.3               | 4.5         | 140.9      | 12                |
| (+)-17b         | 657.7     | 3               | 11.3               | 4.4         | 141.3      | 12                |
| (-)-17b         | 657.7     | 3               | 11.3               | 4.5         | 141.0      | 12                |
| (+)-17c         | 657.7     | 3               | 11.3               | 4.3         | 141.7      | 12                |



|         |       |   |      |     |       |    |
|---------|-------|---|------|-----|-------|----|
| (-)-17c | 657.7 | 3 | 11.3 | 4.5 | 140.7 | 12 |
| (+)-17d | 692.1 | 3 | 11.3 | 4.7 | 140.9 | 12 |
| (-)-17d | 692.1 | 3 | 11.3 | 5.0 | 140.4 | 12 |
| (+)-17e | 675.7 | 3 | 11.3 | 4.5 | 141.7 | 12 |
| (-)-17e | 675.7 | 3 | 11.3 | 4.7 | 140.7 | 12 |
| (+)-17f | 692.1 | 3 | 11.3 | 4.7 | 142.5 | 12 |
| (-)-17f | 692.1 | 3 | 11.3 | 4.8 | 141.2 | 12 |
| (+)-17g | 725.9 | 3 | 11.0 | 5.6 | 134.3 | 13 |
| (-)-17g | 725.9 | 3 | 11.0 | 7.1 | 152.0 | 13 |
| (+)-17h | 688.2 | 3 | 11.3 | 4.8 | 140.6 | 12 |
| (-)-17h | 688.2 | 3 | 11.3 | 6.0 | 160.4 | 12 |
| (+)-17i | 740.8 | 4 | 14.0 | 3.7 | 151.3 | 12 |
| (-)-17i | 725.8 | 3 | 13.5 | 5.4 | 160.5 | 11 |
| (+)-17j | 752.8 | 4 | 14.8 | 3.6 | 156.6 | 13 |
| (-)-17j | 737.8 | 3 | 14.3 | 5.2 | 168.7 | 12 |
| (+)-17k | 701.7 | 4 | 15.0 | 2.1 | 189.2 | 13 |
| (-)-17k | 701.7 | 4 | 15.0 | 2.5 | 198.4 | 13 |

**Table S20:** Definition of lead-like, drug-like and Known drug space (KDS) in terms of molecular descriptors. The values given are the maxima for each descriptor for the volumes of chemical space used.

|                                            | <b>Lead-like Space</b> | <b>Drug-like Space</b> | <b>Known Drug Space</b> |
|--------------------------------------------|------------------------|------------------------|-------------------------|
| Molecular weight (g mol <sup>-1</sup> )    | 300                    | 500                    | 800                     |
| Lipophilicity (Log P)                      | 3                      | 5                      | 6.5                     |
| Hydrogen bond donors (HD)                  | 3                      | 5                      | 7                       |
| Hydrogen bond acceptors (HA)               | 3                      | 10                     | 15                      |
| Polar surface area (Å <sup>2</sup> ) (PSA) | 60                     | 140                    | 180                     |
| Rotatable bonds (RB)                       | 3                      | 10                     | 17                      |

**Table S21:** Known drug index calculated

| <b>Compound</b> | <b>KDI-2A</b> | <b>KDI-2B</b> |
|-----------------|---------------|---------------|
| (+)-16a         | 4.41          | 0.12          |
| (-)-16a         | 4.41          | 0.12          |
| (+)-16b         | 4.52          | 0.15          |
| (-)-16b         | 4.42          | 0.13          |
| (+)-16c         | 5.50          | 0.57          |
| (-)-16c         | 4.51          | 0.15          |
| (+)-16d         | 4.42          | 0.13          |
| (-)-16d         | 4.48          | 0.16          |
| (+)-16e         | 4.67          | 0.20          |
| (-)-16e         | 4.47          | 0.16          |
| (+)-16f         | 4.73          | 0.22          |
| (-)-16f         | 4.64          | 0.19          |
| (+)-16g         | 4.42          | 0.13          |
| (-)-16g         | 4.44          | 0.13          |
| (+)-16h         | 4.63          | 0.19          |
| (-)-16h         | 4.65          | 0.19          |
| (+)-16i         | 3.41          | 0.01          |
| (-)-16i         | 4.73          | 0.22          |
| (+)-16j         | 3.92          | 0.06          |
| (-)-16j         | 4.44          | 0.13          |
| (+)-16k         | 4.42          | 0.13          |
| (-)-16k         | 4.68          | 0.21          |
| (-)-16m         | 4.75          | 0.23          |
| (+)-16m         | 3.92          | 0.06          |
| (+)-16l         | 4.67          | 0.20          |
| (-)-16l         | 4.68          | 0.21          |
| (+)-16n         | 4.65          | 0.19          |
| (-)-16n         | 4.25          | 0.11          |
| (+)-16o         | 4.29          | 0.12          |
| (-)-16o         | 4.74          | 0.23          |
| (+)-16p         | 4.24          | 0.11          |
| (-)-16p         | 2.40          | 0.00          |
| (+)-16q         | 4.73          | 0.22          |
| (-)-16q         | 4.31          | 0.12          |
| (+)-16r         | 3.29          | 0.01          |
| (-)-16r         | 2.91          | 0.01          |
| (+)-17a         | 4.06          | 0.08          |
| (-)-17a         | 3.28          | 0.01          |
| (+)-17b         | 3.41          | 0.01          |
| (-)-17b         | 2.62          | 0.00          |
| (+)-17c         | 2.43          | 0.00          |
| (-)-17c         | 4.07          | 0.08          |
| (+)-17d         | 3.42          | 0.01          |
| (-)-17d         | 3.40          | 0.01          |
| (+)-17e         | 3.09          | 0.00          |
| (-)-17e         | 3.25          | 0.01          |
| (+)-17f         | 3.30          | 0.01          |
| (-)-17f         | 3.33          | 0.01          |
| (+)-17g         | 3.18          | 0.01          |

|         |      |      |
|---------|------|------|
| (-)-17g | 3.39 | 0.01 |
| (+)-17h | 3.35 | 0.01 |
| (-)-17h | 2.87 | 0.00 |
| (+)-17i | 3.40 | 0.01 |
| (-)-17i | 2.67 | 0.00 |
| (+)-17j | 3.28 | 0.01 |
| (-)-17j | 4.03 | 0.07 |
| (+)-17k | 4.25 | 0.09 |
| (-)-17k | 4.72 | 0.22 |

### **RMSD of other crystal structures of Tdp1 (docked without water)**

#### 1. 6dim

| Pose    | ASP   | ChemPLP | CS    | GS    |
|---------|-------|---------|-------|-------|
| 1       | 0.623 | 2.799   | 1.624 | 5.881 |
| 2       | 0.832 | 2.710   | 2.184 | 5.846 |
| 3       | 1.910 | 2.835   | 1.717 | 5.986 |
| Average | 1.122 | 2.781   | 1.842 | 5.904 |

#### 2. 6djd

| Pose    | ASP   | ChemPLP | CS    | GS    |
|---------|-------|---------|-------|-------|
| 1       | 2.792 | 2.839   | 2.788 | 5.969 |
| 2       | 2.800 | 2.816   | 2.862 | 5.923 |
| 3       | 2.593 | 2.739   | 2.949 | 6.407 |
| Average | 2.728 | 2.798   | 2.867 | 6.100 |

#### 3. 6dje

| Pose    | ASP   | ChemPLP | CS    | GS    |
|---------|-------|---------|-------|-------|
| 1       | 1.878 | 0.920   | 2.508 | 5.469 |
| 2       | 2.011 | 0.508   | 1.686 | 5.488 |
| 3       | 2.326 | 0.757   | 1.713 | 5.831 |
| Average | 2.071 | 0.728   | 1.969 | 5.596 |

#### 4.6djf

| Pose    | ASP   | ChemPLP | CS    | GS    |
|---------|-------|---------|-------|-------|
| 1       | 1.800 | 5.279   | 5.167 | 5.830 |
| 2       | 1.702 | 5.216   | 5.191 | 5.792 |
| 3       | 2.070 | 5.260   | 5.273 | 5.828 |
| Average | 1.857 | 5.252   | 5.210 | 5.817 |

#### 5. 6djg

| Pose | ASP   | ChemPLP | CS    | GS    |
|------|-------|---------|-------|-------|
| 1    | 2.037 | 5.187   | 1.891 | 5.892 |
| 2    | 2.178 | 5.198   | 1.881 | 5.824 |

|         |       |       |       |       |
|---------|-------|-------|-------|-------|
| 3       | 1.917 | 5.209 | 2.266 | 5.837 |
| Average | 2.044 | 5.198 | 2.012 | 5.851 |

#### 6. 6djh

| Pose    | ASP   | ChemPLP | CS    | GS    |
|---------|-------|---------|-------|-------|
| 1       | 1.622 | 0.800   | 5.400 | 5.680 |
| 2       | 1.999 | 0.796   | 5.281 | 5.633 |
| 3       | 1.949 | 0.857   | 5.272 | 5.527 |
| Average | 1.857 | 0.818   | 5.318 | 5.614 |

#### 7. 6dji

| Pose    | ASP   | ChemPLP | CS    | GS    |
|---------|-------|---------|-------|-------|
| 1       | 3.563 | 3.547   | 5.185 | 2.860 |
| 2       | 3.551 | 3.533   | 5.164 | 2.705 |
| 3       | 3.607 | 3.603   | 5.205 | 2.627 |
| Average | 3.574 | 3.561   | 5.184 | 2.730 |

#### 8. 6mj5

| Pose    | ASP   | ChemPLP | CS    | GS    |
|---------|-------|---------|-------|-------|
| 1       | 1.868 | 0.862   | 1.781 | 5.789 |
| 2       | 1.901 | 0.782   | 1.917 | 5.861 |
| 3       | 1.957 | 0.794   | 1.571 | 5.857 |
| Average | 1.908 | 0.813   | 1.756 | 5.836 |

#### 9. 6n17

| Pose    | ASP    | ChemPLP | CS     | GS     |
|---------|--------|---------|--------|--------|
| 1       | 12.490 | 13.368  | 12.501 | 11.456 |
| 2       | 12.192 | 13.356  | 12.329 | 11.535 |
| 3       | 12.498 | 12.616  | 12.432 | 11.886 |
| Average | 12.393 | 13.113  | 12.421 | 11.626 |

#### 10. 6n19

| Pose    | ASP   | ChemPLP | CS    | GS    |
|---------|-------|---------|-------|-------|
| 1       | 8.577 | 2.595   | 2.340 | 3.821 |
| 2       | 2.385 | 2.472   | 2.448 | 4.010 |
| 3       | 7.805 | 1.610   | 2.137 | 4.011 |
| Average | 6.256 | 2.226   | 2.309 | 3.947 |
